# Supplementary material
Source: PubMed Central journal article supplement (PMC2734157)
Supplement: msp113_1.pdf [file msp113_1.pdf]

**Supplementary Material for “Genomic features that predict allelic imbalance in humans are negatively correlated with gene density, expression evenness, and selective constraint”**

Tung, J, Fédrigo, O, Haygood, R, Mukherjee, S, Wray, GA

**Table S1: Factor weights for the four factors produced from the NMF analysis. Features are ordered by decreasing weight for the AI factor.**

| <b>Feature ID</b>                                                                    | <b>AI factor</b> | <b>Factor 2</b> | <b>Factor 3</b> | <b>Factor 4</b> |
|--------------------------------------------------------------------------------------|------------------|-----------------|-----------------|-----------------|
| proportion of C-T SNPs in 2 kb up relative to total num SNPs                         | 0.4797           | 0               | 0.05023         | 0.05527         |
| proportion of transitions in 2 kb up relative to total num of SNPs                   | 0.43752          | 0.17686         | 0.19444         | 0.25054         |
| number of C-T SNPs in 2kb flanking                                                   | 0.39944          | 0.02578         | 0               | 0.16425         |
| C-T SNPs per bp in 2kb flanking                                                      | 0.39944          | 0.02578         | 0               | 0.16425         |
| total snps per bp in 2 kb up                                                         | 0.38989          | 0.01193         | 0.03526         | 0.04173         |
| number of C-G SNPs in 2 kb up                                                        | 0.38523          | 0               | 0               | 0               |
| C-G SNPs per bp in 2 kb up                                                           | 0.38523          | 0               | 0               | 0               |
| C-G SNPs per bp in ccds plus 10kb flanking                                           | 0.37558          | 0.0774          | 0.0255          | 0.14676         |
| number of A-G SNPs in 10 kb up                                                       | 0.36722          | 0.08257         | 0.03047         | 0.1178          |
| A-G SNPs per bp in 10 kb up                                                          | 0.36722          | 0.08257         | 0.03047         | 0.1178          |
| number of transversions in 10 kb up                                                  | 0.3599           | 0.02407         | 0.0341          | 0.01629         |
| transversions per bp 10 kb up                                                        | 0.3599           | 0.02407         | 0.0341          | 0.01629         |
| number of A-G SNPs in 10kb flanking                                                  | 0.35711          | 0.13807         | 0.02004         | 0.18405         |
| A-G SNPs per bp in 10kb flanking                                                     | 0.35711          | 0.13807         | 0.02004         | 0.18405         |
| transversions per bp 5 kb up                                                         | 0.34326          | 0.0285          | 0.02865         | 0               |
| number of total SNPS in 10 kb up                                                     | 0.3432           | 0.0496          | 0.02818         | 0.0633          |
| total snps per bp in 10 kb up                                                        | 0.3432           | 0.0496          | 0.02818         | 0.0633          |
| number of transitions in 10 kb up                                                    | 0.33596          | 0.06312         | 0.02774         | 0.08668         |
| transitions per bp in 10 kb up                                                       | 0.33596          | 0.06312         | 0.02774         | 0.08668         |
| number of C-G SNPs in 10kb flanking                                                  | 0.32675          | 0.04723         | 0.03136         | 0.1032          |
| C-G SNPs per bp in 10kb flanking                                                     | 0.32675          | 0.04723         | 0.03136         | 0.1032          |
| number of A-T SNPs in 10kb flanking                                                  | 0.32046          | 0.05435         | 0               | 0               |
| A-T SNPs per bp in 10kb flanking                                                     | 0.32046          | 0.05435         | 0               | 0               |
| number of A-G SNPs in 5kb flanking                                                   | 0.30497          | 0.10462         | 0.01241         | 0.15311         |
| A-G SNPs per bp in 5kb flanking                                                      | 0.30497          | 0.10462         | 0.01241         | 0.15311         |
| number of transversions in 5 kb down                                                 | 0.28294          | 0.137           | 0.04818         | 0.08995         |
| number of A-T SNPs in 10 kb up                                                       | 0.26877          | 0               | 0               | 0               |
| A-T SNPs per bp in 10 kb up                                                          | 0.26877          | 0               | 0               | 0               |
| proportion of divergent sites that (no gaps) are transversions in ccds + 10 kb flank | 0.26002          | 0.48757         | 0.32599         | 0.39974         |
| proportion of transitions in 2 kb down relative to total num of SNPs                 | 0.25949          | 0.35319         | 0.14243         | 0.45487         |
| number of C-G SNPs in 10 kb up                                                       | 0.2586           | 0               | 0.02511         | 0               |
| C-G SNPs per bp in 10 kb up                                                          | 0.2586           | 0               | 0.02511         | 0               |
| total snps per bp in 5 kb down                                                       | 0.25821          | 0.12968         | 0.01153         | 0.17439         |
| number of C-T SNPs in 2 kb up                                                        | 0.25542          | 0               | 0               | 0.0098          |
| C-T SNPs per bp in 2 kb up                                                           | 0.25542          | 0               | 0               | 0.0098          |
| proportion of divergent sites that (no gaps) are transversions in 10 kb flank        | 0.25423          | 0.46463         | 0.30301         | 0.38924         |
| proportion of divergent sites that (no gaps) are transversions in 10 kb down         | 0.24007          | 0.42568         | 0.27452         | 0.35358         |
| frequency of AAGGA in 5' flanking                                                    | 0.2347           | 0.32837         | 0.13528         | 0.26699         |
| transitions per bp in the CCDS                                                       | 0.23439          | 0.07959         | 0.05169         | 0.14207         |
| frequency of CAATC in 5' flanking                                                    | 0.22377          | 0.31953         | 0.2924          | 0.10595         |

|                                                                                                |         |         |         |         |
|------------------------------------------------------------------------------------------------|---------|---------|---------|---------|
| frequency of TTTC in 5' flanking                                                               | 0.22363 | 0.42652 | 0.15209 | 0.22098 |
| proportion of CT divergent sites relative to total num divergent sites (no gaps) in 5 kb flank | 0.22103 | 0.4258  | 0.34228 | 0.40568 |
| frequency of TCATT in 5' flanking                                                              | 0.2196  | 0.44858 | 0.11839 | 0.03345 |
| frequency of ATCCT in 5' flanking                                                              | 0.21787 | 0.28418 | 0.26105 | 0.25126 |
| AT divergent sites per bp in 10 kb flank                                                       | 0.21753 | 0.25208 | 0.20607 | 0.12411 |
| AT divergent sites per bp in 5 kb flank                                                        | 0.21701 | 0.23544 | 0.22237 | 0.11264 |
| frequency of CAACC in 5' flanking                                                              | 0.21697 | 0.17839 | 0.2529  | 0.28675 |
| frequency of AAGAG in 5' flanking                                                              | 0.21673 | 0.29918 | 0.17583 | 0.22622 |
| proportion of transitions in introns relative to total number of SNPs                          | 0.21599 | 0.39823 | 0.2791  | 0.43817 |
| frequency of ACATC in 5' flanking                                                              | 0.21561 | 0.28283 | 0.11804 | 0.15084 |
| number LINEs in 10 kb downstream                                                               | 0.21555 | 0.14886 | 0.15893 | 0.07301 |
| frequency of CAATG in 5' flanking                                                              | 0.2154  | 0.28884 | 0.13303 | 0.14724 |
| frequency of AAATG in 5' flanking                                                              | 0.214   | 0.5679  | 0.14589 | 0.06679 |
| frequency of CAGAT in 5' flanking                                                              | 0.21393 | 0.39444 | 0.209   | 0.26759 |
| proportion of CT divergent sites relative to total num divergent sites (no gaps) in 10 kb up   | 0.21305 | 0.42812 | 0.31515 | 0.40676 |
| AC divergent sites per bp in 10 kb down                                                        | 0.21279 | 0.17923 | 0.17411 | 0.2514  |
| proportion of divergent sites that (no gaps) are transversions in 5 kb down                    | 0.21243 | 0.39299 | 0.2408  | 0.31162 |
| number of transitions in 2 kb down                                                             | 0.21054 | 0.09345 | 0.00672 | 0.19206 |
| transitions per bp in 2 kb down                                                                | 0.21054 | 0.09345 | 0.00672 | 0.19206 |
| proportion of divergent transversions per bp in 5 kb flank                                     | 0.2102  | 0.18633 | 0.20466 | 0.28708 |
| frequency of ATTCC in 5' flanking                                                              | 0.20875 | 0.31323 | 0.13368 | 0.16122 |
| frequency of ATTGC in 5' flanking                                                              | 0.20701 | 0.40654 | 0.2361  | 0.08142 |
| frequency of ACTCA in 5' flanking                                                              | 0.20674 | 0.34055 | 0.23947 | 0.2259  |
| frequency of CATT A in 5' flanking                                                             | 0.20554 | 0.44077 | 0.08044 | 0.00889 |
| proportion of transitions in 5 kb down relative to total num of SNPs                           | 0.20542 | 0.44051 | 0.23358 | 0.46361 |
| proportion of transitions in the CCDS relative to total number of SNPs                         | 0.20281 | 0.40762 | 0.2805  | 0.49304 |
| frequency of CTATT in 5' flanking                                                              | 0.20202 | 0.39281 | 0.09777 | 0.0008  |
| frequency of CAACT in 5' flanking                                                              | 0.20148 | 0.35428 | 0.14032 | 0.16113 |
| frequency of ATGGT in 5' flanking                                                              | 0.20074 | 0.36154 | 0.36094 | 0.1368  |
| number of total SNPs in exons                                                                  | 0.20033 | 0.06614 | 0.01679 | 0.09354 |
| frequency of ACTCT in 5' flanking                                                              | 0.19894 | 0.35519 | 0.2082  | 0.2542  |
| frequency of GCAAA in 5' flanking                                                              | 0.19813 | 0.35402 | 0.13191 | 0.12823 |
| frequency of TTCTC in 5' flanking                                                              | 0.198   | 0.31551 | 0.1965  | 0.21531 |
| frequency of CCAGA in 5' flanking                                                              | 0.19752 | 0.15347 | 0.17942 | 0.43537 |
| frequency of CCTAC in 5' flanking                                                              | 0.1953  | 0.21523 | 0.17856 | 0.30115 |
| frequency of TACCC in 5' flanking                                                              | 0.19519 | 0.26548 | 0.14338 | 0.22891 |
| frequency of CAAAT in 5' flanking                                                              | 0.19457 | 0.47702 | 0.13454 | 0.05755 |
| number of transversions in exons                                                               | 0.19414 | 0.02519 | 0       | 0.00238 |
| frequency of ATGAT in 5' flanking                                                              | 0.19394 | 0.45193 | 0.15219 | 0.0524  |
| number of A-G SNPs in 5 kb down                                                                | 0.19378 | 0.11087 | 0       | 0.13174 |
| A-G SNPs per bp in 5 kb down                                                                   | 0.19378 | 0.11087 | 0       | 0.13174 |
| frequency of GAGTT in 5' flanking                                                              | 0.19367 | 0.37888 | 0.31965 | 0.18281 |
| frequency of CTTTG in 5' flanking                                                              | 0.1931  | 0.39952 | 0.20143 | 0.20848 |
| frequency of AAGCA in 5' flanking                                                              | 0.19266 | 0.42989 | 0.19003 | 0.19953 |
| frequency of CTAGA in 5' flanking                                                              | 0.19202 | 0.28313 | 0.12486 | 0.14653 |
| frequency of TCAAC in 5' flanking                                                              | 0.19201 | 0.3015  | 0.12173 | 0.12347 |
| A-T SNPs per bp in ccds plus 10kb flanking                                                     | 0.19187 | 0.0776  | 0       | 0.01891 |

|                                                                                                        |         |         |         |         |
|--------------------------------------------------------------------------------------------------------|---------|---------|---------|---------|
| frequency of CAATA in 5' flanking                                                                      | 0.19117 | 0.39352 | 0.12945 | 0.01389 |
| proportion of divergent sites that (no gaps) are transversions in ccds + 2kb flank                     | 0.19108 | 0.38968 | 0.25964 | 0.31957 |
| frequency of AGACT in 5' flanking                                                                      | 0.19037 | 0.29526 | 0.2387  | 0.24683 |
| proportion of transitions in introns plus 5 kb flanking relative to total num of SNPs                  | 0.19035 | 0.42522 | 0.31923 | 0.47136 |
| frequency of AAGCT in 5' flanking                                                                      | 0.18954 | 0.36268 | 0.16976 | 0.22066 |
| frequency of TATCT in 5' flanking                                                                      | 0.18912 | 0.41099 | 0.08929 | 0.04269 |
| frequency of TGCTC in 5' flanking                                                                      | 0.18893 | 0.15506 | 0.16521 | 0.39228 |
| frequency of TTTGC in 5' flanking                                                                      | 0.18853 | 0.43565 | 0.11153 | 0.16748 |
| frequency of CTGTT in 5' flanking                                                                      | 0.18606 | 0.47336 | 0.21297 | 0.20718 |
| proportion of transitions in ccds plus 5kb flanking relative to total num of SNPs                      | 0.18567 | 0.42691 | 0.3223  | 0.47817 |
| frequency of GATTC in 5' flanking                                                                      | 0.18506 | 0.38253 | 0.25288 | 0.16434 |
| frequency of ACAAG in 5' flanking                                                                      | 0.1849  | 0.3625  | 0.18899 | 0.20155 |
| frequency of TCTCC in 5' flanking                                                                      | 0.18388 | 0.14713 | 0.21218 | 0.39802 |
| proportion of GT divergent sites relative to total num divergent sites (no gaps) in ccds + 10 kb flank | 0.18264 | 0.42611 | 0.22959 | 0.30141 |
| frequency of AGCTC in 5' flanking                                                                      | 0.18233 | 0.10802 | 0.18808 | 0.37578 |
| frequency of ACATT in 5' flanking                                                                      | 0.18178 | 0.47505 | 0.10564 | 0.04506 |
| frequency of AGAAT in 5' flanking                                                                      | 0.18143 | 0.47416 | 0.2005  | 0.07835 |
| frequency of CTCTT in 5' flanking                                                                      | 0.18016 | 0.26647 | 0.13461 | 0.15942 |
| frequency of GAGAG in 5' flanking                                                                      | 0.17887 | 0.13414 | 0.10163 | 0.31378 |
| AT divergent sites per bp in 10 kb up                                                                  | 0.17869 | 0.21893 | 0.20785 | 0.12292 |
| proportion of CT divergent sites relative to total num divergent sites (no gaps) in 5 kb up            | 0.17863 | 0.37844 | 0.28666 | 0.31929 |
| frequency of TGGTA in 5' flanking                                                                      | 0.17668 | 0.35763 | 0.14071 | 0.07038 |
| frequency of TTTTC in 5' flanking                                                                      | 0.17636 | 0.51201 | 0.14368 | 0.0761  |
| AG divergent sites per bp in introns                                                                   | 0.1761  | 0.18147 | 0.15112 | 0.2811  |
| frequency of AATGG in 5' flanking                                                                      | 0.17607 | 0.40113 | 0.1716  | 0.15005 |
| frequency of ATTGA in 5' flanking                                                                      | 0.17504 | 0.49846 | 0.1016  | 0.02851 |
| percentage LINEs in 10 kb downstream                                                                   | 0.1739  | 0.09815 | 0.05577 | 0.01557 |
| frequency of TAGCA in 5' flanking                                                                      | 0.17298 | 0.3998  | 0.11421 | 0.08604 |
| AT divergent sites per bp in 5 kb down                                                                 | 0.17279 | 0.18203 | 0.14414 | 0.06525 |
| frequency of ATCTC in 5' flanking                                                                      | 0.17262 | 0.25617 | 0.3355  | 0.17549 |
| frequency of ACTTG in 5' flanking                                                                      | 0.17243 | 0.33314 | 0.22228 | 0.17279 |
| proportion of C-G SNPs in exons relative to total num SNPs                                             | 0.17154 | 0       | 0       | 0       |
| frequency of TGATT in 5' flanking                                                                      | 0.17153 | 0.48771 | 0.14207 | 0.04225 |
| frequency of CCTTC in 5' flanking                                                                      | 0.17146 | 0.17209 | 0.14078 | 0.37069 |
| frequency of GGTAT in 5' flanking                                                                      | 0.16961 | 0.33316 | 0.13921 | 0.05453 |
| frequency of TTGCT in 5' flanking                                                                      | 0.16941 | 0.39896 | 0.15834 | 0.15641 |
| frequency of ATAGG in 5' flanking                                                                      | 0.16883 | 0.32897 | 0.20187 | 0.0871  |
| frequency of GGCTT in 5' flanking                                                                      | 0.16759 | 0.2265  | 0.15101 | 0.36076 |
| frequency of GGTA in 5' flanking                                                                       | 0.16637 | 0.41913 | 0.15359 | 0.11846 |
| frequency of CAAGT in 5' flanking                                                                      | 0.16594 | 0.38665 | 0.27453 | 0.19997 |
| frequency of GTTCC in 5' flanking                                                                      | 0.16575 | 0.18913 | 0.1385  | 0.34889 |
| frequency of GAAGG in 5' flanking                                                                      | 0.16496 | 0.16374 | 0.12256 | 0.43041 |
| frequency of TAATG in 5' flanking                                                                      | 0.16471 | 0.48239 | 0.09444 | 0.01624 |
| number of G-T SNPs in 10 kb up                                                                         | 0.16461 | 0.02571 | 0.05762 | 0       |
| G-T SNPs per bp in 10 kb up                                                                            | 0.16461 | 0.02571 | 0.05762 | 0       |
| frequency of TTTCT in 5' flanking                                                                      | 0.16417 | 0.40462 | 0.141   | 0.07531 |
| proportion of transitions in 10 kb up relative to total num of SNPs                                    | 0.16404 | 0.46327 | 0.26795 | 0.46645 |

|                                                                                                |         |         |         |         |
|------------------------------------------------------------------------------------------------|---------|---------|---------|---------|
| frequency of AAGAC in 5' flanking                                                              | 0.16397 | 0.30062 | 0.20202 | 0.19373 |
| frequency of CACTG in 5' flanking                                                              | 0.16364 | 0.21169 | 0.35423 | 0.40543 |
| frequency of ACTGA in 5' flanking                                                              | 0.16361 | 0.36228 | 0.12119 | 0.19359 |
| frequency of CAATT in 5' flanking                                                              | 0.16361 | 0.40527 | 0.13547 | 0.02415 |
| proportion of C-G SNPs in 2 kb up relative to total num SNPs                                   | 0.16351 | 0       | 0       | 0       |
| proportion of AT divergent sites relative to total num divergent sites (no gaps) in 5 kb flank | 0.1626  | 0.35076 | 0.19642 | 0.08905 |
| frequency of CTACC in 5' flanking                                                              | 0.16183 | 0.23515 | 0.17438 | 0.20079 |
| frequency of GATCC in 5' flanking                                                              | 0.16116 | 0.18478 | 0.35412 | 0.30372 |
| frequency of AGCAT in 5' flanking                                                              | 0.16037 | 0.2978  | 0.11949 | 0.11579 |
| percentage LINE1 in 5 kb downstream                                                            | 0.15946 | 0.00302 | 0.04875 | 0       |
| proportion of GT divergent sites relative to total num divergent sites (no gaps) in 10 kb up   | 0.15943 | 0.31447 | 0.16895 | 0.22803 |
| frequency of TCAAG in 5' flanking                                                              | 0.15941 | 0.33292 | 0.37135 | 0.19598 |
| AT divergent sites per bp in 10 kb down                                                        | 0.15939 | 0.18639 | 0.12879 | 0.085   |
| frequency of TAGGG in 5' flanking                                                              | 0.15848 | 0.22748 | 0.14394 | 0.29717 |
| frequency of GATAC in 5' flanking                                                              | 0.15802 | 0.35868 | 0.07785 | 0.0669  |
| frequency of TGAAA in 5' flanking                                                              | 0.158   | 0.46259 | 0.15218 | 0.05876 |
| frequency of GAGCT in 5' flanking                                                              | 0.15785 | 0.13736 | 0.17915 | 0.41239 |
| frequency of AGAGC in 5' flanking                                                              | 0.15752 | 0.15152 | 0.15109 | 0.40121 |
| frequency of TCATA in 5' flanking                                                              | 0.15698 | 0.44387 | 0.1215  | 0.00538 |
| frequency of TCTCT in 5' flanking                                                              | 0.15694 | 0.20899 | 0.18484 | 0.17692 |
| frequency of CACTT in 5' flanking                                                              | 0.15652 | 0.3331  | 0.27312 | 0.19447 |
| proportion of CG divergent sites relative to total num divergent sites (no gaps) in 10 kb down | 0.1552  | 0.23323 | 0.20782 | 0.37536 |
| frequency of GTTGA in 5' flanking                                                              | 0.15504 | 0.3309  | 0.13054 | 0.10398 |
| percentage LINEs in 5 kb downstream                                                            | 0.1549  | 0.01665 | 0.07093 | 0       |
| frequency of CTTGA in 5' flanking                                                              | 0.15474 | 0.34677 | 0.37235 | 0.16635 |
| frequency of TAAGC in 5' flanking                                                              | 0.15468 | 0.34755 | 0.15202 | 0.14525 |
| number of synonymous snps                                                                      | 0.15466 | 0.05934 | 0.006   | 0.07503 |
| proportion of G-T SNPs in introns plus 5 kb flanking relative to total num SNPs                | 0.1544  | 0.18558 | 0.13282 | 0.07462 |
| number LINE1 in 10 kb downstream                                                               | 0.15438 | 0.08457 | 0.08931 | 0.01202 |
| frequency of TTAAA in 5' flanking                                                              | 0.15399 | 0.53173 | 0.09392 | 0.01086 |
| frequency of AATGA in 5' flanking                                                              | 0.15376 | 0.38434 | 0.09424 | 0.06749 |
| GC content in ccds                                                                             | 0.15346 | 0.30793 | 0.29313 | 0.46538 |
| frequency of GAACA in 5' flanking                                                              | 0.15322 | 0.32035 | 0.09363 | 0.15142 |
| frequency of TGTCC in 5' flanking                                                              | 0.15301 | 0.11913 | 0.1106  | 0.36095 |
| frequency of ACTAG in 5' flanking                                                              | 0.15239 | 0.32627 | 0.12122 | 0.09951 |
| frequency of TTAGC in 5' flanking                                                              | 0.15232 | 0.3712  | 0.31409 | 0.11636 |
| frequency of TTGAC in 5' flanking                                                              | 0.15216 | 0.35472 | 0.148   | 0.12699 |
| frequency of CACTC in 5' flanking                                                              | 0.15126 | 0.11663 | 0.24109 | 0.3462  |
| proportion of AG divergent sites relative to total num divergent sites (no gaps) in 2 kb down  | 0.15123 | 0.31052 | 0.21385 | 0.31602 |
| number of G-T SNPs in 5 kb up                                                                  | 0.14948 | 0.0138  | 0.01247 | 0       |
| frequency of GCTGA in 5' flanking                                                              | 0.1488  | 0.16052 | 0.31558 | 0.38175 |
| frequency of AGATC in 5' flanking                                                              | 0.1485  | 0.24337 | 0.25965 | 0.17054 |
| frequency of AATTC in 5' flanking                                                              | 0.14838 | 0.38712 | 0.12915 | 0.04679 |
| frequency of ATCAT in 5' flanking                                                              | 0.14799 | 0.29624 | 0.10389 | 0.03649 |
| frequency of TAGGT in 5' flanking                                                              | 0.14751 | 0.32645 | 0.1243  | 0.10062 |
| proportion of AT divergent sites relative to total num divergent sites (no gaps) in 10 kb      | 0.14745 | 0.28069 | 0.19183 | 0.10838 |

|                                                                                             |         |         |         |         |
|---------------------------------------------------------------------------------------------|---------|---------|---------|---------|
| up                                                                                          |         |         |         |         |
| frequency of TAATA in 5' flanking                                                           | 0.1466  | 0.46731 | 0.12087 | 0       |
| frequency of TCTTT in 5' flanking                                                           | 0.14646 | 0.36922 | 0.14253 | 0.0629  |
| frequency of AGTGA in 5' flanking                                                           | 0.14561 | 0.30019 | 0.31323 | 0.17944 |
| frequency of TAGGC in 5' flanking                                                           | 0.14487 | 0.24096 | 0.24133 | 0.19187 |
| percentage LINE1 in 10 kb downstream                                                        | 0.14373 | 0.07502 | 0.03214 | 0.00521 |
| frequency of CTCTG in 5' flanking                                                           | 0.14356 | 0.13426 | 0.21257 | 0.39804 |
| frequency of TTATC in 5' flanking                                                           | 0.14333 | 0.47505 | 0.11757 | 0.01849 |
| frequency of TTTGG in 5' flanking                                                           | 0.14307 | 0.43759 | 0.21919 | 0.17436 |
| frequency of CTTGT in 5' flanking                                                           | 0.14182 | 0.32323 | 0.13599 | 0.14933 |
| frequency of GTACA in 5' flanking                                                           | 0.14021 | 0.28078 | 0.11771 | 0.09952 |
| frequency of TCACC in 5' flanking                                                           | 0.13906 | 0.12977 | 0.28027 | 0.28998 |
| frequency of CTTAC in 5' flanking                                                           | 0.13877 | 0.46312 | 0.12736 | 0.11285 |
| frequency of AACTG in 5' flanking                                                           | 0.13871 | 0.36081 | 0.11754 | 0.16253 |
| frequency of AAGTT in 5' flanking                                                           | 0.13826 | 0.54164 | 0.12256 | 0.06489 |
| transversions per bp in exons                                                               | 0.13817 | 0.01133 | 0.01267 | 0       |
| frequency of GTGCA in 5' flanking                                                           | 0.1376  | 0.16743 | 0.26834 | 0.34006 |
| frequency of TATTC in 5' flanking                                                           | 0.13684 | 0.37699 | 0.08687 | 0.01732 |
| proportion of A-C SNPs in ccds plus 10kb flanking relative to total num SNPs                | 0.1366  | 0.17682 | 0.14171 | 0.09695 |
| frequency of ATAGC in 5' flanking                                                           | 0.13659 | 0.37349 | 0.1591  | 0.05706 |
| proportion of AT divergent sites relative to total num divergent sites (no gaps) in 5 kb up | 0.13643 | 0.28078 | 0.18812 | 0.09786 |
| proportion of divergent sites that (no gaps) are transversions in 2 kb down                 | 0.13528 | 0.28997 | 0.19595 | 0.236   |
| proportion of AG divergent sites relative to total num divergent sites (no gaps) in introns | 0.13491 | 0.22326 | 0.15707 | 0.21053 |
| frequency of GTACC in 5' flanking                                                           | 0.1349  | 0.27101 | 0.1011  | 0.17268 |
| frequency of CCTTG in 5' flanking                                                           | 0.13458 | 0.19015 | 0.18106 | 0.36306 |
| number of C-G SNPs in exons                                                                 | 0.13438 | 0       | 0       | 0       |
| number of A-T SNPs in 2 kb up                                                               | 0.13438 | 0       | 0       | 0       |
| A-T SNPs per bp in 2 kb up                                                                  | 0.13438 | 0       | 0       | 0       |
| proportion of divergent transversions per bp in 5 kb up                                     | 0.1341  | 0.14399 | 0.14318 | 0.20389 |
| frequency of CTATA in 5' flanking                                                           | 0.13387 | 0.37387 | 0.10871 | 0.01968 |
| frequency of TTGGT in 5' flanking                                                           | 0.13383 | 0.35727 | 0.14115 | 0.13314 |
| frequency of TTACTION in 5' flanking                                                        | 0.13245 | 0.43404 | 0.08252 | 0.02035 |
| frequency of ACTAA in 5' flanking                                                           | 0.13239 | 0.40697 | 0.22622 | 0.06005 |
| proportion of AG divergent sites relative to total num divergent sites (no gaps) in exons   | 0.13229 | 0.2436  | 0.13405 | 0.18912 |
| number of divergent transitions in 5 kb flank                                               | 0.13179 | 0.10184 | 0.14617 | 0.197   |
| frequency of TCTTG in 5' flanking                                                           | 0.13173 | 0.34382 | 0.23537 | 0.16084 |
| frequency of ATAAC in 5' flanking                                                           | 0.13133 | 0.35667 | 0.10423 | 0       |
| frequency of GTTAC in 5' flanking                                                           | 0.1312  | 0.38766 | 0.15762 | 0.06392 |
| frequency of GTCTG in 5' flanking                                                           | 0.13073 | 0.13145 | 0.1322  | 0.32892 |
| proportion of A-T SNPs in 5 kb up relative to total num SNPs                                | 0.13002 | 0       | 0       | 0       |
| frequency of CTTGC in 5' flanking                                                           | 0.12952 | 0.2539  | 0.1739  | 0.32864 |
| CT divergent sites per bp in ccds                                                           | 0.12946 | 0.10819 | 0.1333  | 0.21906 |
| frequency of TGCTG in 5' flanking                                                           | 0.12937 | 0.18553 | 0.20049 | 0.37373 |
| frequency of GATCA in 5' flanking                                                           | 0.1289  | 0.17943 | 0.25995 | 0.14898 |
| frequency of AAAAA in 5' flanking                                                           | 0.12767 | 0.35222 | 0.20322 | 0.06627 |
| frequency of TCAGT in 5' flanking                                                           | 0.12746 | 0.31341 | 0.11971 | 0.14739 |
| frequency of TTGTT in 5' flanking                                                           | 0.12736 | 0.38103 | 0.14762 | 0.02814 |

|                                                                                          |         |         |         |         |
|------------------------------------------------------------------------------------------|---------|---------|---------|---------|
| proportion of G-T SNPs in ccds plus 5kb flanking relative to total num SNPs              | 0.12708 | 0.2487  | 0.17705 | 0.09465 |
| AT divergent sites per bp in 5 kb up                                                     | 0.12708 | 0.14232 | 0.15874 | 0.08432 |
| frequency of TTGAA in 5' flanking                                                        | 0.12653 | 0.45706 | 0.18693 | 0.04897 |
| frequency of TGCCT in 5' flanking                                                        | 0.12638 | 0.16263 | 0.30211 | 0.33408 |
| frequency of GCCTT in 5' flanking                                                        | 0.12622 | 0.22627 | 0.19392 | 0.36108 |
| frequency of TTGGG in 5' flanking                                                        | 0.12547 | 0.24758 | 0.29887 | 0.37329 |
| frequency of TTGGC in 5' flanking                                                        | 0.12538 | 0.27018 | 0.28301 | 0.26324 |
| proportion of A-G SNPs in introns plus 2 kb flanking relative to total num SNPs          | 0.12526 | 0.28223 | 0.20153 | 0.33992 |
| frequency of GTAGA in 5' flanking                                                        | 0.12353 | 0.39173 | 0.3133  | 0.18892 |
| frequency of ACCAC in 5' flanking                                                        | 0.1222  | 0.14265 | 0.30369 | 0.22604 |
| frequency of GCAAC in 5' flanking                                                        | 0.12213 | 0.23101 | 0.32594 | 0.19994 |
| frequency of AGTGT in 5' flanking                                                        | 0.12177 | 0.30713 | 0.09568 | 0.19158 |
| C-G SNPs per bp in introns plus 5 kb flanking                                            | 0.12159 | 0.01692 | 0.005   | 0.03908 |
| frequency of ATAAT in 5' flanking                                                        | 0.12117 | 0.39871 | 0.10998 | 0       |
| frequency of TATCA in 5' flanking                                                        | 0.12086 | 0.34048 | 0.07482 | 0.00277 |
| frequency of TAGTG in 5' flanking                                                        | 0.1203  | 0.46006 | 0.20251 | 0.09452 |
| frequency of CCAAG in 5' flanking                                                        | 0.11979 | 0.11198 | 0.18685 | 0.30179 |
| frequency of GTAAG in 5' flanking                                                        | 0.11946 | 0.38691 | 0.15229 | 0.10798 |
| proportion of AC divergent sites relative to total num divergent sites (no gaps) in ccds | 0.11898 | 0.23815 | 0.15901 | 0.18489 |
| frequency of GTATA in 5' flanking                                                        | 0.11892 | 0.40926 | 0.09131 | 0       |
| frequency of TGACC in 5' flanking                                                        | 0.11808 | 0.12073 | 0.21313 | 0.28266 |
| frequency of GAGTA in 5' flanking                                                        | 0.11768 | 0.36045 | 0.28646 | 0.10328 |
| frequency of ATTAT in 5' flanking                                                        | 0.11755 | 0.45168 | 0.12488 | 0       |
| frequency of GGTAG in 5' flanking                                                        | 0.11723 | 0.24668 | 0.15384 | 0.22888 |
| frequency of GGGTT in 5' flanking                                                        | 0.11676 | 0.17989 | 0.32398 | 0.35173 |
| frequency of GCTTG in 5' flanking                                                        | 0.11516 | 0.23794 | 0.27135 | 0.35016 |
| frequency of TTGTA in 5' flanking                                                        | 0.11505 | 0.51979 | 0.22768 | 0.03069 |
| frequency of GGATT in 5' flanking                                                        | 0.115   | 0.40471 | 0.41344 | 0.14952 |
| frequency of CTTAA in 5' flanking                                                        | 0.11419 | 0.44229 | 0.09547 | 0.05104 |
| transversions per bp introns plus 5 kb flanking                                          | 0.11402 | 0.028   | 0.00505 | 0.02356 |
| frequency of TACAG in 5' flanking                                                        | 0.11393 | 0.33658 | 0.37285 | 0.12951 |
| frequency of TAACC in 5' flanking                                                        | 0.11367 | 0.32321 | 0.13529 | 0.10671 |
| frequency of CACAG in 5' flanking                                                        | 0.113   | 0.09991 | 0.11743 | 0.30929 |
| frequency of TACTC in 5' flanking                                                        | 0.11234 | 0.3129  | 0.21327 | 0.08534 |
| frequency of AGGCT in 5' flanking                                                        | 0.11209 | 0.12689 | 0.41774 | 0.37146 |
| number of A-C SNPs in 2 kb down                                                          | 0.11136 | 0.03543 | 0       | 0.0087  |
| A-C SNPs per bp in 2 kb down                                                             | 0.11136 | 0.03543 | 0       | 0.0087  |
| frequency of CCTGT in 5' flanking                                                        | 0.11056 | 0.12212 | 0.29412 | 0.33205 |
| frequency of GTAGG in 5' flanking                                                        | 0.11054 | 0.26589 | 0.1605  | 0.25036 |
| frequency of TAGCT in 5' flanking                                                        | 0.10956 | 0.41251 | 0.38942 | 0.15427 |
| frequency of CCATC in 5' flanking                                                        | 0.10953 | 0.09017 | 0.15698 | 0.25978 |
| frequency of CTGTG in 5' flanking                                                        | 0.10893 | 0.12058 | 0.08727 | 0.28403 |
| frequency of GAATG in 5' flanking                                                        | 0.10773 | 0.24496 | 0.0732  | 0.10782 |
| proportion of divergent sites per bp in 5 kb up                                          | 0.10753 | 0.09612 | 0.11467 | 0.15269 |
| frequency of GTGAT in 5' flanking                                                        | 0.10611 | 0.30864 | 0.30836 | 0.14893 |
| frequency of GTCCC in 5' flanking                                                        | 0.10365 | 0.01521 | 0.09635 | 0.38087 |
| frequency of ACTAC in 5' flanking                                                        | 0.10351 | 0.30585 | 0.24604 | 0.07147 |

|                                                                                                |         |         |         |         |
|------------------------------------------------------------------------------------------------|---------|---------|---------|---------|
| frequency of TTTTG in 5' flanking                                                              | 0.10332 | 0.45798 | 0.23932 | 0.06204 |
| A-G SNPs per bp in introns plus 5 kb flanking                                                  | 0.10296 | 0.02547 | 0.00489 | 0.04893 |
| number MaLRs in 10 kb downstream                                                               | 0.10279 | 0.05024 | 0.09316 | 0.00568 |
| frequency of CAGTG in 5' flanking                                                              | 0.10248 | 0.21251 | 0.30823 | 0.35101 |
| frequency of ATGTA in 5' flanking                                                              | 0.10225 | 0.43137 | 0.09823 | 0.03306 |
| proportion of AT divergent sites relative to total num divergent sites (no gaps) in 2 kb flank | 0.10175 | 0.23081 | 0.13294 | 0.05874 |
| total % bases masked in 2 kb downstream                                                        | 0.10142 | 0.00556 | 0.34395 | 0.00116 |
| G-T SNPs per bp in introns plus 5 kb flanking                                                  | 0.10103 | 0.02253 | 0.00546 | 0.01517 |
| frequency of GCTCC in 5' flanking                                                              | 0.10064 | 0.01907 | 0.08286 | 0.48974 |
| frequency of AGTAG in 5' flanking                                                              | 0.09989 | 0.30434 | 0.37513 | 0.1261  |
| frequency of TTTGT in 5' flanking                                                              | 0.0997  | 0.40476 | 0.18629 | 0.05767 |
| percentage MER1 type in ceds plus 10 kb flanking                                               | 0.0978  | 0.14773 | 0.03176 | 0.02078 |
| proportion of total divergent sites that are gaps, including gaps in 2 kb down                 | 0.09739 | 0.32043 | 0.30494 | 0.25141 |
| frequency of AGGTC in 5' flanking                                                              | 0.09681 | 0.10813 | 0.16319 | 0.28209 |
| frequency of CTCCA in 5' flanking                                                              | 0.09593 | 0.04639 | 0.12698 | 0.23577 |
| transitions per bp in introns plus 5 kb flanking                                               | 0.09586 | 0.02284 | 0.00547 | 0.04381 |
| AT divergent sites per bp in 2 kb up                                                           | 0.09565 | 0.06684 | 0.09817 | 0.06074 |
| proportion of GT divergent sites relative to total num divergent sites (no gaps) in 5 kb up    | 0.09554 | 0.22303 | 0.12297 | 0.15606 |
| proportion of AT divergent sites relative to total num divergent sites (no gaps) in 2 kb up    | 0.09509 | 0.14073 | 0.10514 | 0.06971 |
| A-T SNPs per bp in introns plus 5 kb flanking                                                  | 0.09508 | 0.0318  | 0       | 0.007   |
| frequency of TTATT in 5' flanking                                                              | 0.09464 | 0.37171 | 0.12713 | 0.00283 |
| frequency of CCACC in 5' flanking                                                              | 0.09383 | 0.0372  | 0.31635 | 0.43437 |
| frequency of TCCCC in 5' flanking                                                              | 0.09383 | 0.04484 | 0.05098 | 0.3466  |
| proportion of A-C SNPs in 2 kb down relative to total num SNPs                                 | 0.09345 | 0.06614 | 0       | 0.02342 |
| percentage MIRs in 10 kb downstream                                                            | 0.09336 | 0.05089 | 0.08106 | 0.04886 |
| proportion of CG divergent sites relative to total num divergent sites (no gaps) in exons      | 0.09211 | 0.05757 | 0.08382 | 0.1144  |
| frequency of GAGAC in 5' flanking                                                              | 0.09202 | 0.13495 | 0.39836 | 0.27748 |
| number of divergent transitions in 5 kb up                                                     | 0.09163 | 0.07466 | 0.09794 | 0.12582 |
| frequency of ACGTT in 5' flanking                                                              | 0.0912  | 0.19447 | 0.10355 | 0.18068 |
| frequency of TCGTT in 5' flanking                                                              | 0.09092 | 0.24197 | 0.07791 | 0.15182 |
| A-C SNPs per bp in introns plus 2 kb flanking                                                  | 0.08975 | 0.01608 | 0.00802 | 0.01291 |
| frequency of CAACG in 5' flanking                                                              | 0.08931 | 0.12177 | 0.07542 | 0.24406 |
| proportion of C-T SNPs in 10 kb down relative to total num SNPs                                | 0.08918 | 0.21869 | 0.12381 | 0.20918 |
| proportion of GT divergent sites relative to total num divergent sites (no gaps) in ceds       | 0.08846 | 0.1995  | 0.10925 | 0.15981 |
| frequency of ATGTG in 5' flanking                                                              | 0.08676 | 0.17229 | 0.05106 | 0.09944 |
| number MIRs in 5 kb downstream                                                                 | 0.08379 | 0.02944 | 0.12171 | 0.02769 |
| frequency of CCTGG in 5' flanking                                                              | 0.08285 | 0.01731 | 0.22998 | 0.41776 |
| frequency of TAGCC in 5' flanking                                                              | 0.08272 | 0.19929 | 0.26786 | 0.17023 |
| proportion of CG divergent sites relative to total num divergent sites (no gaps) in ceds       | 0.0827  | 0.15367 | 0.15245 | 0.24329 |
| percentage MIRs in 5 kb downstream                                                             | 0.08256 | 0.02778 | 0.09857 | 0.01962 |
| frequency of GCTGC in 5' flanking                                                              | 0.0824  | 0.04441 | 0.06919 | 0.39742 |
| number of C-T SNPs in exons                                                                    | 0.08199 | 0.02669 | 0.01833 | 0.06642 |
| percentage LINEs in 2 kb downstream                                                            | 0.07973 | 0       | 0.04148 | 0       |
| proportion of C-T SNPs in exons relative to total num SNPs                                     | 0.07882 | 0.09232 | 0.12859 | 0.21953 |
| frequency of TTATA in 5' flanking                                                              | 0.07834 | 0.3846  | 0.07407 | 0       |
| frequency of CTAGC in 5' flanking                                                              | 0.07793 | 0.29884 | 0.17925 | 0.26547 |
| number LINEs in 10 kb upstream                                                                 | 0.07772 | 0.22256 | 0.11958 | 0.11346 |

|                                                               |         |         |         |         |
|---------------------------------------------------------------|---------|---------|---------|---------|
| frequency of GACGT in 5' flanking                             | 0.07668 | 0.06427 | 0.06582 | 0.34574 |
| frequency of CAGGG in 5' flanking                             | 0.07624 | 0.00472 | 0.08679 | 0.38215 |
| number of nonsynonymous snps                                  | 0.07563 | 0.01003 | 0.01641 | 0.03392 |
| frequency of GGTCC in 5' flanking                             | 0.07493 | 0.01654 | 0.07185 | 0.37251 |
| total % bases masked in 10 kb upstream                        | 0.07303 | 0.31709 | 0.41593 | 0.1935  |
| C-G SNPs per bp in introns plus 2 kb flanking                 | 0.07288 | 0.00738 | 0.00087 | 0.01514 |
| frequency of GCAGG in 5' flanking                             | 0.07272 | 0.01945 | 0.14438 | 0.42104 |
| frequency of ACGTG in 5' flanking                             | 0.0722  | 0.04069 | 0.08926 | 0.29115 |
| frequency of CTACA in 5' flanking                             | 0.07106 | 0.11341 | 0.09132 | 0.06751 |
| frequency of CAGCC in 5' flanking                             | 0.07104 | 0.02285 | 0.2649  | 0.4044  |
| proportion of C-T SNPs in 5 kb up relative to total num SNPs  | 0.07103 | 0.25252 | 0.12248 | 0.19947 |
| frequency of CGAAA in 5' flanking                             | 0.07097 | 0.13937 | 0.1116  | 0.14615 |
| frequency of ACCCC in 5' flanking                             | 0.06954 | 0.01747 | 0.10233 | 0.32202 |
| number LINE1 in 10 kb upstream                                | 0.06947 | 0.16055 | 0.09441 | 0.04386 |
| CG divergent sites per bp in ceds                             | 0.06924 | 0.06363 | 0.09873 | 0.17809 |
| AT divergent sites per bp in 2 kb flank                       | 0.06735 | 0.06017 | 0.0717  | 0.05076 |
| transversions per bp introns plus 2 kb flanking               | 0.06681 | 0.0103  | 0.00174 | 0.01004 |
| frequency of GGGTG in 5' flanking                             | 0.06679 | 0.02393 | 0.09472 | 0.32226 |
| frequency of GGACC in 5' flanking                             | 0.06497 | 0.01967 | 0.06299 | 0.35694 |
| A-G SNPs per bp in introns plus 2 kb flanking                 | 0.06476 | 0.00774 | 0.00211 | 0.02696 |
| frequency of GACCC in 5' flanking                             | 0.0643  | 0.00723 | 0.05471 | 0.28108 |
| proportion of A-C SNPs in 10 kb up relative to total num SNPs | 0.06406 | 0.08035 | 0.01159 | 0.06079 |
| number of A-T SNPs in exons                                   | 0.06239 | 0.0355  | 0       | 0.00291 |
| proportion of C-G SNPs in introns relative to total num SNPs  | 0.06164 | 0.06312 | 0.04105 | 0.03761 |
| frequency of GTAGT in 5' flanking                             | 0.0615  | 0.34461 | 0.22576 | 0.06655 |
| frequency of GGTGT in 5' flanking                             | 0.06056 | 0.07738 | 0.10207 | 0.18919 |
| transitions per bp in introns plus 2 kb flanking              | 0.05992 | 0.00648 | 0.00221 | 0.02178 |
| frequency of ATCGT in 5' flanking                             | 0.05963 | 0.16776 | 0.09735 | 0.20595 |
| frequency of TACAC in 5' flanking                             | 0.05786 | 0.09096 | 0.03545 | 0.05645 |
| frequency of CGGTT in 5' flanking                             | 0.05688 | 0.09535 | 0.03665 | 0.23357 |
| percentage LINE1 in 2 kb downstream                           | 0.05661 | 0       | 0.01148 | 0       |
| frequency of TCGAT in 5' flanking                             | 0.05624 | 0.16865 | 0.15185 | 0.10768 |
| number MIRs in 2kb upstream                                   | 0.05518 | 0.0355  | 0.07064 | 0.05404 |
| frequency of CGTTT in 5' flanking                             | 0.05461 | 0.16283 | 0.05083 | 0.17946 |
| A-T SNPs per bp in introns plus 2 kb flanking                 | 0.05455 | 0.01159 | 0       | 0.00296 |
| number of divergent transversions in exons                    | 0.05432 | 0.01513 | 0.02872 | 0.04404 |
| frequency of CTCGT in 5' flanking                             | 0.05378 | 0.0779  | 0.09805 | 0.22858 |
| proportion of A-G SNPs in 10 kb up relative to total num SNPs | 0.05345 | 0.23628 | 0.14349 | 0.26245 |
| frequency of GGCTC in 5' flanking                             | 0.0516  | 0.05018 | 0.22459 | 0.39769 |
| frequency of CGTTC in 5' flanking                             | 0.05102 | 0.0898  | 0.05342 | 0.27492 |
| frequency of ATGCG in 5' flanking                             | 0.05035 | 0.08521 | 0.06121 | 0.24873 |
| frequency of CGAAG in 5' flanking                             | 0.05024 | 0.08825 | 0.00664 | 0.27529 |
| G-T SNPs per bp in introns plus 2 kb flanking                 | 0.05023 | 0.00706 | 0.00154 | 0.0087  |
| percentage LINE2 in 5 kb downstream                           | 0.04973 | 0.01662 | 0.06638 | 0.00095 |
| percentage LTR in 5 kb downstream                             | 0.0489  | 0.00641 | 0.07651 | 0       |
| percentage MIRs in 2 kb downstream                            | 0.04829 | 0       | 0.0998  | 0       |
| frequency of ACCCG in 5' flanking                             | 0.04771 | 0       | 0.18077 | 0.37794 |



|                                                                                 |         |         |         |         |
|---------------------------------------------------------------------------------|---------|---------|---------|---------|
| frequency of GGATG in 5' flanking                                               | 0.04769 | 0.06145 | 0.04803 | 0.15899 |
| proportion of G-T SNPs in 10 kb down relative to total num SNPs                 | 0.04752 | 0.10864 | 0.11718 | 0.03685 |
| frequency of GGAGG in 5' flanking                                               | 0.04745 | 0.04075 | 0.19493 | 0.34938 |
| frequency of AAGCG in 5' flanking                                               | 0.04727 | 0.0788  | 0.15822 | 0.26548 |
| CG divergent sites per bp in introns                                            | 0.04644 | 0.04787 | 0.05588 | 0.14157 |
| frequency of TATGG in 5' flanking                                               | 0.04615 | 0.07655 | 0.03499 | 0.0237  |
| CG divergent sites per bp in exons                                              | 0.04589 | 0       | 0.04082 | 0.05963 |
| number of G-T SNPs in exons                                                     | 0.04476 | 0.01495 | 0.01634 | 0       |
| proportion of G-T SNPs in introns relative to total num SNPs                    | 0.04445 | 0.05303 | 0.03942 | 0.0164  |
| frequency of GCGAC in 5' flanking                                               | 0.04384 | 0       | 0.10419 | 0.35243 |
| frequency of GCCCC in 5' flanking                                               | 0.04373 | 0       | 0.02841 | 0.40195 |
| frequency of CGCAC in 5' flanking                                               | 0.04368 | 0.01944 | 0.109   | 0.30984 |
| number of exons in the gene                                                     | 0.04311 | 0.16458 | 0.06191 | 0.13084 |
| proportion of A-C SNPs in 5 kb down relative to total num SNPs                  | 0.04238 | 0.02911 | 0.0369  | 0.04808 |
| frequency of CGTGT in 5' flanking                                               | 0.04214 | 0.0528  | 0.04625 | 0.22645 |
| frequency of ACACG in 5' flanking                                               | 0.04157 | 0.02449 | 0.04206 | 0.20316 |
| frequency of AGTCG in 5' flanking                                               | 0.04139 | 0.0772  | 0.04636 | 0.30174 |
| frequency of ACCGG in 5' flanking                                               | 0.03958 | 0.01247 | 0.03493 | 0.23007 |
| percentage LTR in 10 kb downstream                                              | 0.03938 | 0.04172 | 0.08506 | 0       |
| frequency of ATCCG in 5' flanking                                               | 0.03918 | 0.08542 | 0.17834 | 0.27633 |
| percentage unclassified in 2kb upstream                                         | 0.03887 | 0       | 0.02785 | 0.02982 |
| frequency of CGTCA in 5' flanking                                               | 0.03852 | 0.04769 | 0.02744 | 0.16135 |
| percentage LINE2 in 5 kb upstream                                               | 0.03796 | 0.04319 | 0.04495 | 0.05462 |
| proportion of G-T SNPs in 2 kb down relative to total num SNPs                  | 0.03586 | 0.04518 | 0       | 0.0414  |
| frequency of TCGAG in 5' flanking                                               | 0.03556 | 0.0714  | 0.16824 | 0.18139 |
| proportion of G-T SNPs in introns plus 2 kb flanking relative to total num SNPs | 0.03261 | 0.05288 | 0.04789 | 0.02076 |
| frequency of CGAGA in 5' flanking                                               | 0.03209 | 0.05953 | 0.24954 | 0.19968 |
| total % bases masked in 2kb upstream                                            | 0.03191 | 0.13663 | 0.37021 | 0.1015  |
| frequency of GCGTA in 5' flanking                                               | 0.02929 | 0.08296 | 0.04362 | 0.13776 |
| frequency of TCGGA in 5' flanking                                               | 0.02908 | 0.07741 | 0.04787 | 0.34219 |
| number L3/CR1 in 5 kb downstream                                                | 0.02803 | 0       | 0       | 0.04523 |
| frequency of GGCCC in 5' flanking                                               | 0.02701 | 0       | 0.03868 | 0.38452 |
| frequency of GGTTCG in 5' flanking                                              | 0.02628 | 0.01486 | 0.07626 | 0.36403 |
| frequency of CGGAT in 5' flanking                                               | 0.02613 | 0.05611 | 0.14507 | 0.24306 |
| frequency of CCGAC in 5' flanking                                               | 0.02487 | 0.00563 | 0.03679 | 0.27188 |
| frequency of GGACG in 5' flanking                                               | 0.02438 | 0       | 0.03114 | 0.30157 |
| frequency of ACTCG in 5' flanking                                               | 0.02419 | 0.08191 | 0.15095 | 0.29109 |
| frequency of GTCCG in 5' flanking                                               | 0.02387 | 0.01527 | 0.03691 | 0.29858 |
| frequency of TAGCG in 5' flanking                                               | 0.02377 | 0.12674 | 0.09714 | 0.17394 |
| frequency of CGGAG in 5' flanking                                               | 0.02336 | 0.02019 | 0.09872 | 0.3723  |
| frequency of CTCGA in 5' flanking                                               | 0.02243 | 0.07375 | 0.22825 | 0.23989 |
| frequency of CGCTG in 5' flanking                                               | 0.02225 | 0       | 0.02715 | 0.4069  |
| frequency of AGCGT in 5' flanking                                               | 0.02167 | 0.09358 | 0.03991 | 0.21071 |
| frequency of CGGTG in 5' flanking                                               | 0.02164 | 0.03782 | 0.12163 | 0.27857 |
| number simple repeats in 2 kb downstream                                        | 0.02156 | 0.03977 | 0.01881 | 0.02932 |
| percentage ERV classII in 2kb upstream                                          | 0.02064 | 0       | 0.02892 | 0.03451 |
| percentage unclassified in 5 kb downstream                                      | 0.02008 | 0.01162 | 0.03547 | 0       |

|                                                                                    |         |         |         |         |
|------------------------------------------------------------------------------------|---------|---------|---------|---------|
| proportion of C-G SNPs in 5 kb down relative to total num SNPs                     | 0.01993 | 0.03974 | 0.08074 | 0.06388 |
| proportion of C-G SNPs in 2 kb down relative to total num SNPs                     | 0.01947 | 0.02355 | 0.01881 | 0.065   |
| frequency of GTGTG in 5' flanking                                                  | 0.01917 | 0.04631 | 0.02385 | 0.06993 |
| frequency of ACGAC in 5' flanking                                                  | 0.01915 | 0.10566 | 0.10811 | 0.23684 |
| frequency of CCGAG in 5' flanking                                                  | 0.01751 | 0.00358 | 0.21412 | 0.41633 |
| frequency of CCGTA in 5' flanking                                                  | 0.01721 | 0.12069 | 0.06881 | 0.18652 |
| percentage unclassified in ccds                                                    | 0.01702 | 0       | 0.01059 | 0.01542 |
| frequency of TCGTC in 5' flanking                                                  | 0.01639 | 0.09834 | 0.04524 | 0.30837 |
| percentage unclassified in ccds plus 2kb flanking                                  | 0.01619 | 0       | 0.01416 | 0.01807 |
| frequency of CGTCC in 5' flanking                                                  | 0.01583 | 0.01388 | 0.02158 | 0.39855 |
| frequency of GTCGG in 5' flanking                                                  | 0.01491 | 0.00954 | 0.04157 | 0.26739 |
| frequency of CGGGT in 5' flanking                                                  | 0.01477 | 0.00701 | 0.14198 | 0.34003 |
| frequency of CACGG in 5' flanking                                                  | 0.01415 | 0.01826 | 0.07054 | 0.28779 |
| frequency of CTGCG in 5' flanking                                                  | 0.01395 | 0.0283  | 0.03618 | 0.36808 |
| number MaLRs in ccds plus 10 kb flanking                                           | 0.0135  | 0.10186 | 0.00402 | 0.02129 |
| percentage low complexity in 5 kb downstream                                       | 0.01324 | 0.10694 | 0.02245 | 0.03963 |
| number of transversions in introns                                                 | 0.01317 | 0.10387 | 0       | 0.01098 |
| percentage unclassified in ccds plus 5 kb flanking                                 | 0.01271 | 0       | 0.04401 | 0.01633 |
| frequency of CTACG in 5' flanking                                                  | 0.01203 | 0.12961 | 0.11042 | 0.25733 |
| frequency of CGAGG in 5' flanking                                                  | 0.01186 | 0.01337 | 0.10624 | 0.38545 |
| frequency of TTCGC in 5' flanking                                                  | 0.01081 | 0.07591 | 0.11264 | 0.27502 |
| percentage simple repeats in 5 kb upstream                                         | 0.01041 | 0.01564 | 0.00829 | 0.06686 |
| frequency of GTGCG in 5' flanking                                                  | 0.00951 | 0.02926 | 0.07567 | 0.31567 |
| frequency of ACGGG in 5' flanking                                                  | 0.00829 | 0.00925 | 0.0734  | 0.21662 |
| percentage low complexity in 2 kb downstream                                       | 0.00806 | 0.07745 | 0       | 0.00949 |
| percentage ERVL in 2kb upstream                                                    | 0.00795 | 0.0164  | 0.00274 | 0       |
| frequency of CCCGC in 5' flanking                                                  | 0.00751 | 0.0203  | 0.0767  | 0.4499  |
| percentage ALUs in 5 kb downstream                                                 | 0.00711 | 0.02315 | 0.35254 | 0.03151 |
| frequency of CCGCT in 5' flanking                                                  | 0.00697 | 0.01398 | 0.03711 | 0.46551 |
| proportion of G-T SNPs in 10 kb up relative to total num SNPs                      | 0.00637 | 0.0755  | 0.08807 | 0.01859 |
| frequency of TGGCG in 5' flanking                                                  | 0.00637 | 0.02493 | 0.02731 | 0.32488 |
| number SINEs in 10 kb upstream                                                     | 0.00606 | 0.12324 | 0.42013 | 0.17238 |
| frequency of CGAGC in 5' flanking                                                  | 0.00564 | 0.05072 | 0.034   | 0.37464 |
| proportion unalignable (gaps in human or other species) per bp in ccds + 2kb flank | 0.0054  | 0       | 0.04127 | 0.04197 |
| proportion unalignable (gaps in human or other species) per bp in introns          | 0.00523 | 0.00111 | 0.04315 | 0.03857 |
| frequency of TACGA in 5' flanking                                                  | 0.00479 | 0.18895 | 0.08199 | 0.11796 |
| proportion unalignable (gaps in other species) per bp in 2 kb down                 | 0.00371 | 0.00071 | 0.03753 | 0.01598 |
| number ERV classI in ccds plus 2kb flanking                                        | 0.00306 | 0.04895 | 0.00119 | 0.00732 |
| number ERV classI in ccds                                                          | 0.00294 | 0.04605 | 0       | 0.00422 |
| frequency of CCGGC in 5' flanking                                                  | 0.00291 | 0.00572 | 0.05887 | 0.27873 |
| percentage unclassified in ccds plus 10 kb flanking                                | 0.00246 | 0       | 0.05516 | 0.00845 |
| percentage LTR in 5 kb upstream                                                    | 0.00222 | 0.05156 | 0.05414 | 0.04206 |
| percentage simple repeats in 2kb upstream                                          | 0.00134 | 0.00734 | 0.00285 | 0.04722 |
| number LINE1 in ccds plus 5 kb flanking                                            | 0.00085 | 0.11567 | 0       | 0.00995 |
| frequency of GCGTC in 5' flanking                                                  | 0.00073 | 0.04343 | 0.02028 | 0.3595  |
| number LINEs in ccds plus 5 kb flanking                                            | 0.00001 | 0.10169 | 0.00102 | 0.01323 |
| frequency of ACGCC in 5' flanking                                                  | 0.00001 | 0.02942 | 0.26939 | 0.31071 |

|                                                                                       |   |         |         |         |
|---------------------------------------------------------------------------------------|---|---------|---------|---------|
| total repeats (number SINEs + LINEs + LTR + DNA elements) in ccds                     | 0 | 0.11274 | 0.00657 | 0.01867 |
| percentage ALUs in 2kb upstream                                                       | 0 | 0.01987 | 0.31486 | 0.02592 |
| percentage L3/CR1 in 2kb upstream                                                     | 0 | 0.00921 | 0       | 0.00334 |
| percentage MER1 type in 2kb upstream                                                  | 0 | 0       | 0.01716 | 0       |
| percentage low complexity in 2kb upstream                                             | 0 | 0.05246 | 0       | 0.10204 |
| number SINEs in 2 kb downstream                                                       | 0 | 0       | 0.3296  | 0       |
| percentage SINEs in 2 kb downstream                                                   | 0 | 0       | 0.33995 | 0       |
| number ALUs in 2 kb downstream                                                        | 0 | 0       | 0.3225  | 0       |
| percentage LTR in 2 kb downstream                                                     | 0 | 0       | 0.08369 | 0       |
| number MaLRs in 2 kb downstream                                                       | 0 | 0       | 0.05324 | 0       |
| percentage MaLRs in 2 kb downstream                                                   | 0 | 0       | 0.07514 | 0       |
| percentage ERV classII in 2 kb downstream                                             | 0 | 0       | 0.01066 | 0       |
| percentage L3/CR1 in 5 kb upstream                                                    | 0 | 0.03022 | 0       | 0       |
| number MaLRs in 5 kb upstream                                                         | 0 | 0.10089 | 0.03402 | 0.01733 |
| percentage unclassified in 5 kb upstream                                              | 0 | 0       | 0.01819 | 0       |
| number low complexity in 5 kb upstream                                                | 0 | 0.16661 | 0.01662 | 0.1244  |
| percentage SINEs in 10 kb upstream                                                    | 0 | 0.11048 | 0.43388 | 0.15884 |
| number ALUs in 10 kb upstream                                                         | 0 | 0.08827 | 0.43125 | 0.13562 |
| percentage unclassified in 10 kb upstream                                             | 0 | 0       | 0.03804 | 0       |
| percentage low complexity in 10 kb upstream                                           | 0 | 0.14137 | 0.04097 | 0.19922 |
| percentage unclassified in 10 kb downstream                                           | 0 | 0.01757 | 0.01065 | 0.02368 |
| percentage satellites in 10 kb downstream                                             | 0 | 0.02422 | 0       | 0.01323 |
| number LINEs in ccds plus 2kb flanking                                                | 0 | 0.09702 | 0       | 0.01025 |
| number LINE1 in ccds plus 2kb flanking                                                | 0 | 0.11099 | 0       | 0.00664 |
| number L3/CR1 in ccds plus 5 kb flanking                                              | 0 | 0.05523 | 0       | 0.00425 |
| number L3/CR1 in ccds plus 10 kb flanking                                             | 0 | 0.05878 | 0       | 0.00829 |
| total repeats (number SINEs + LINEs + LTR + DNA elements) in ccds plus 10 kb flanking | 0 | 0.12554 | 0.03174 | 0.03551 |
| frequency of CGCCT in 5' flanking                                                     | 0 | 0.06604 | 0.34595 | 0.3973  |
| frequency of CGGCG in 5' flanking                                                     | 0 | 0.02128 | 0       | 0.19489 |
| frequency of CGGGC in 5' flanking                                                     | 0 | 0.00606 | 0.0722  | 0.3526  |
| frequency of GACGG in 5' flanking                                                     | 0 | 0.01319 | 0.11014 | 0.18598 |
| frequency of GCGAT in 5' flanking                                                     | 0 | 0.07248 | 0.26616 | 0.15793 |
| frequency of GCGCC in 5' flanking                                                     | 0 | 0.01863 | 0.08467 | 0.2732  |
| frequency of GCGGG in 5' flanking                                                     | 0 | 0.01747 | 0.03713 | 0.31672 |
| frequency of GCGGT in 5' flanking                                                     | 0 | 0.06198 | 0.09682 | 0.33797 |
| frequency of GGCGC in 5' flanking                                                     | 0 | 0.00992 | 0.06939 | 0.25885 |
| frequency of TCGCC in 5' flanking                                                     | 0 | 0.05465 | 0.16983 | 0.34933 |
| frequency of TCGGC in 5' flanking                                                     | 0 | 0.03052 | 0.22286 | 0.278   |
| proportion unalignable (gaps in other species) per bp in 10 kb flank                  | 0 | 0.01313 | 0.09386 | 0.10386 |

Table S2. Complete list of 2,269 features used in full model SVM. Features are color-coded by feature type (gray indicates polymorphism features, lavender indicates sequence features, and blue indicates divergence features).

| No. | Feature Description                                                    | No. | Feature Description                                                                 | No.  | Feature Description                 |
|-----|------------------------------------------------------------------------|-----|-------------------------------------------------------------------------------------|------|-------------------------------------|
| 1   | number of A-C SNPs in the CCDS                                         | 758 | number satellites in ccds plus 2kb flanking                                         | 1515 | frequency of GGCGA in 5 kb flanking |
| 2   | number of A-G SNPs in the CCDS                                         | 759 | percentage satellites in ccds plus 2kb flanking                                     | 1516 | frequency of GGCGC in 5 kb flanking |
| 3   | number of A-T SNPs in the CCDS                                         | 760 | number simple repeats in ccds plus 2kb flanking                                     | 1517 | frequency of GGCGG in 5 kb flanking |
| 4   | number of C-G SNPs in the CCDS                                         | 761 | percentage simple repeats in ccds plus 2kb flanking                                 | 1518 | frequency of GGCGT in 5 kb flanking |
| 5   | number of C-T SNPs in the CCDS                                         | 762 | number low complexity in ccds plus 2kb flanking                                     | 1519 | frequency of GGCTA in 5 kb flanking |
| 6   | number of G-T SNPs in the CCDS                                         | 763 | percentage low complexity in ccds plus 2kb flanking                                 | 1520 | frequency of GGCTC in 5 kb flanking |
| 7   | number of total snps in the CCDS                                       | 764 | total repeats (number SINEs + LINEs + LTR + DNA elements) in ccds plus 2kb flanking | 1521 | frequency of GGCTG in 5 kb flanking |
| 8   | number of transitions in the CCDS                                      | 765 | GC content in ccds plus 5 kb flanking                                               | 1522 | frequency of GGCTT in 5 kb flanking |
| 9   | number of transversions in the CCDS                                    | 766 | total % bases masked in ccds plus 5 kb flanking                                     | 1523 | frequency of GGGAA in 5 kb flanking |
| 10  | proportion of transitions in the CCDS relative to total number of SNPs | 767 | number SINEs in ccds plus 5 kb flanking                                             | 1524 | frequency of GGGAC in 5 kb flanking |
| 11  | proportion of A-C SNPs in the CCDS relative to total num SNPs          | 768 | percentage SINEs in ccds plus 5 kb flanking                                         | 1525 | frequency of GGGAG in 5 kb flanking |
| 12  | proportion of A-G SNPs in the CCDS relative to total num SNPs          | 769 | number ALUs in ccds plus 5 kb flanking                                              | 1526 | frequency of GGGAT in 5 kb flanking |
| 13  | proportion of A-T SNPs in the CCDS relative to total num SNPs          | 770 | percentage ALUs in ccds plus 5 kb flanking                                          | 1527 | frequency of GGGCA in 5 kb flanking |
| 14  | proportion of C-G SNPs in the CCDS relative to total num SNPs          | 771 | number MIRs in ccds plus 5 kb flanking                                              | 1528 | frequency of GGGCC in 5 kb flanking |
| 15  | proportion of C-T SNPs in the CCDS relative to total num SNPs          | 772 | percentage MIRs in ccds plus 5 kb flanking                                          | 1529 | frequency of GGGCG in 5 kb flanking |
| 16  | proportion of G-T SNPs in the CCDS relative to total num SNPs          | 773 | number LINEs in ccds plus 5 kb flanking                                             | 1530 | frequency of GGGCT in 5 kb flanking |
| 17  | A-C SNPs per bp in the CCDS                                            | 774 | percentage LINEs in ccds plus 5 kb flanking                                         | 1531 | frequency of GGGGA in 5 kb flanking |
| 18  | A-G SNPs per bp in the CCDS                                            | 775 | number LINE1 in ccds plus 5 kb flanking                                             | 1532 | frequency of GGGGC in 5 kb flanking |
| 19  | A-T SNPs per bp in the CCDS                                            | 776 | percentage LINE1 in ccds plus 5 kb flanking                                         | 1533 | frequency of GGGGG in 5 kb flanking |
| 20  | C-G SNPs per bp in the CCDS                                            | 777 | number LINE2 in ccds plus 5 kb flanking                                             | 1534 | frequency of GGGGT in 5 kb flanking |
| 21  | C-T SNPs per bp in the CCDS                                            | 778 | percentage LINE2 in ccds plus 5 kb flanking                                         | 1535 | frequency of GGGTA in 5 kb flanking |
| 22  | G-T SNPs per bp in the CCDS                                            | 779 | number L3/CR1 in ccds plus 5 kb flanking                                            | 1536 | frequency of GGGTC in 5 kb flanking |
| 23  | transitions per bp in the CCDS                                         | 780 | percentage L3/CR1 in ccds plus 5 kb flanking                                        | 1537 | frequency of GGGTG in 5 kb flanking |
| 24  | transversions per bp in the CCDS                                       | 781 | number LTR in ccds plus 5 kb flanking                                               | 1538 | frequency of GGGTT in 5 kb flanking |
| 25  | total snps per bp in the CCDS                                          | 782 | percentage LTR in ccds plus 5 kb flanking                                           | 1539 | frequency of GGTA in 5 kb flanking  |
| 26  | number of A-C SNPs in exons                                            | 783 | number MaLRs in ccds plus 5 kb flanking                                             | 1540 | frequency of GGTAC in 5 kb flanking |
| 27  | number of A-G SNPs in exons                                            | 784 | percentage MaLRs in ccds plus 5 kb flanking                                         | 1541 | frequency of GGTAG in 5 kb flanking |
| 28  | number of A-T SNPs in exons                                            | 785 | number ERVL in ccds plus 5 kb flanking                                              | 1542 | frequency of GGTAT in 5 kb flanking |

|    |                                                                     |     |                                                                                      |      |                                      |
|----|---------------------------------------------------------------------|-----|--------------------------------------------------------------------------------------|------|--------------------------------------|
| 29 | number of C-G SNPs in exons                                         | 786 | percentage ERVL in ccds plus 5 kb flanking                                           | 1543 | frequency of GGTCA in 5 kb flanking  |
| 30 | number of C-T SNPs in exons                                         | 787 | number ERV_classI in ccds plus 5 kb flanking                                         | 1544 | frequency of GGTC in 5 kb flanking   |
| 31 | number of G-T SNPs in exons                                         | 788 | percentage ERV_classI in ccds plus 5 kb flanking                                     | 1545 | frequency of GGTCG in 5 kb flanking  |
| 32 | number of total SNPs in exons                                       | 789 | number ERV_classII in ccds plus 5 kb flanking                                        | 1546 | frequency of GGTCT in 5 kb flanking  |
| 33 | number of transitions in exons                                      | 790 | percentage ERV_classII in ccds plus 5 kb flanking                                    | 1547 | frequency of GGTGA in 5 kb flanking  |
| 34 | number of transversions in exons                                    | 791 | number DNA elements in ccds plus 5 kb flanking                                       | 1548 | frequency of GGTGC in 5 kb flanking  |
| 35 | proportion of transitions in exons relative to total number of SNPs | 792 | percentage DNA elements in ccds plus 5 kb flanking                                   | 1549 | frequency of GGTGG in 5 kb flanking  |
| 36 | proportion of A-C SNPs in exons relative to total num SNPs          | 793 | number MER1_type in ccds plus 5 kb flanking                                          | 1550 | frequency of GGTGT in 5 kb flanking  |
| 37 | proportion of A-G SNPs in exons relative to total num SNPs          | 794 | percentage MER1_type in ccds plus 5 kb flanking                                      | 1551 | frequency of GGTTA in 5 kb flanking  |
| 38 | proportion of A-T SNPs in exons relative to total num SNPs          | 795 | number MER2_type in ccds plus 5 kb flanking                                          | 1552 | frequency of GGTTTC in 5 kb flanking |
| 39 | proportion of C-G SNPs in exons relative to total num SNPs          | 796 | percentage MER2_type in ccds plus 5 kb flanking                                      | 1553 | frequency of GGTTG in 5 kb flanking  |
| 40 | proportion of C-T SNPs in exons relative to total num SNPs          | 797 | number unclassified in ccds plus 5 kb flanking                                       | 1554 | frequency of GGTTT in 5 kb flanking  |
| 41 | proportion of G-T SNPs in exons relative to total num SNPs          | 798 | percentage unclassified in ccds plus 5 kb flanking                                   | 1555 | frequency of GTAAA in 5 kb flanking  |
| 42 | A-C SNPs per bp in exons                                            | 799 | number small RNA in ccds plus 5 kb flanking                                          | 1556 | frequency of GTAAC in 5 kb flanking  |
| 43 | A-G SNPs per bp in exons                                            | 800 | percentage small RNA in ccds plus 5 kb flanking                                      | 1557 | frequency of GTAAG in 5 kb flanking  |
| 44 | A-T SNPs per bp in exons                                            | 801 | number satellites in ccds plus 5 kb flanking                                         | 1558 | frequency of GTAAT in 5 kb flanking  |
| 45 | C-G SNPs per bp in exons                                            | 802 | percentage satellites in ccds plus 5 kb flanking                                     | 1559 | frequency of GTACA in 5 kb flanking  |
| 46 | C-T SNPs per bp in exons                                            | 803 | number simple repeats in ccds plus 5 kb flanking                                     | 1560 | frequency of GTACC in 5 kb flanking  |
| 47 | G-T SNPs per bp in exons                                            | 804 | percentage simple repeats in ccds plus 5 kb flanking                                 | 1561 | frequency of GTACG in 5 kb flanking  |
| 48 | transitions per bp in exons                                         | 805 | number low complexity in ccds plus 5 kb flanking                                     | 1562 | frequency of GTACT in 5 kb flanking  |
| 49 | transversions per bp in exons                                       | 806 | percentage low complexity in ccds plus 5 kb flanking                                 | 1563 | frequency of GTAGA in 5 kb flanking  |
| 50 | total snps per bp in exons                                          | 807 | total repeats (number SINEs + LINEs + LTR + DNA elements) in ccds plus 5 kb flanking | 1564 | frequency of GTAGC in 5 kb flanking  |
| 51 | number of A-C SNPs in introns                                       | 808 | GC content in ccds plus 10 kb flanking                                               | 1565 | frequency of GTAGG in 5 kb flanking  |
| 52 | number of A-G SNPs in introns                                       | 809 | total % bases masked in ccds plus 10 kb flanking                                     | 1566 | frequency of GTAGT in 5 kb flanking  |
| 53 | number of A-T SNPs in introns                                       | 810 | number SINEs in ccds plus 10 kb flanking                                             | 1567 | frequency of GTATA in 5 kb flanking  |
| 54 | number of C-G SNPs in introns                                       | 811 | percentage SINEs in ccds plus 10 kb flanking                                         | 1568 | frequency of GTATC in 5 kb flanking  |
| 55 | number of C-T SNPs in introns                                       | 812 | number ALUs in ccds plus 10 kb flanking                                              | 1569 | frequency of GTATG in 5 kb flanking  |
| 56 | number of G-T SNPs in introns                                       | 813 | percentage ALUs in ccds plus 10 kb flanking                                          | 1570 | frequency of GTATT in 5 kb flanking  |
| 57 | number of total SNPs in introns                                     | 814 | number MIRs in ccds plus 10 kb flanking                                              | 1571 | frequency of GTCAA in 5 kb flanking  |
| 58 | number of transitions in introns                                    | 815 | percentage MIRs in ccds plus 10 kb flanking                                          | 1572 | frequency of GTCAC in 5 kb flanking  |
| 59 | number of transversions in introns                                  | 816 | number LINEs in ccds plus 10 kb flanking                                             | 1573 | frequency of GTCAG in 5 kb flanking  |

|    |                                                                       |     |                                                       |      |                                     |
|----|-----------------------------------------------------------------------|-----|-------------------------------------------------------|------|-------------------------------------|
| 60 | proportion of transitions in introns relative to total number of SNPs | 817 | percentage LINEs in ccds plus 10 kb flanking          | 1574 | frequency of GTCAT in 5 kb flanking |
| 61 | proportion of A-C SNPs in introns relative to total num SNPs          | 818 | number LINE1 in ccds plus 10 kb flanking              | 1575 | frequency of GTCCA in 5 kb flanking |
| 62 | proportion of A-G SNPs in introns relative to total num SNPs          | 819 | percentage LINE1 in ccds plus 10 kb flanking          | 1576 | frequency of GTCCC in 5 kb flanking |
| 63 | proportion of A-T SNPs in introns relative to total num SNPs          | 820 | number LINE2 in ccds plus 10 kb flanking              | 1577 | frequency of GTCCG in 5 kb flanking |
| 64 | proportion of C-G SNPs in introns relative to total num SNPs          | 821 | percentage LINE2 in ccds plus 10 kb flanking          | 1578 | frequency of GTCCT in 5 kb flanking |
| 65 | proportion of C-T SNPs in introns relative to total num SNPs          | 822 | number L3/CR1 in ccds plus 10 kb flanking             | 1579 | frequency of GTCGA in 5 kb flanking |
| 66 | proportion of G-T SNPs in introns relative to total num SNPs          | 823 | percentage L3/CR1 in ccds plus 10 kb flanking         | 1580 | frequency of GTCGC in 5 kb flanking |
| 67 | A-C SNPs per bp in introns                                            | 824 | number LTR in ccds plus 10 kb flanking                | 1581 | frequency of GTCGG in 5 kb flanking |
| 68 | A-G SNPs per bp in introns                                            | 825 | percentage LTR in ccds plus 10 kb flanking            | 1582 | frequency of GTCGT in 5 kb flanking |
| 69 | A-T SNPs per bp in introns                                            | 826 | number MaLRs in ccds plus 10 kb flanking              | 1583 | frequency of GTCTA in 5 kb flanking |
| 70 | C-G SNPs per bp in introns                                            | 827 | percentage MaLRs in ccds plus 10 kb flanking          | 1584 | frequency of GTCTC in 5 kb flanking |
| 71 | C-T SNPs per bp in introns                                            | 828 | number ERVL in ccds plus 10 kb flanking               | 1585 | frequency of GTCTG in 5 kb flanking |
| 72 | G-T SNPs per bp in introns                                            | 829 | percentage ERVL in ccds plus 10 kb flanking           | 1586 | frequency of GTCTT in 5 kb flanking |
| 73 | transitions per bp in introns                                         | 830 | number ERV_classI in ccds plus 10 kb flanking         | 1587 | frequency of GTGAA in 5 kb flanking |
| 74 | transversions per bp in introns                                       | 831 | percentage ERV_classI in ccds plus 10 kb flanking     | 1588 | frequency of GTGAC in 5 kb flanking |
| 75 | total snps per bp in introns                                          | 832 | number ERV_classII in ccds plus 10 kb flanking        | 1589 | frequency of GTGAG in 5 kb flanking |
| 76 | number of A-C SNPs in 2 kb up                                         | 833 | percentage ERV_classII in ccds plus 10 kb flanking    | 1590 | frequency of GTGAT in 5 kb flanking |
| 77 | number of A-G SNPs in 2 kb up                                         | 834 | number DNA elements in ccds plus 10 kb flanking       | 1591 | frequency of GTGCA in 5 kb flanking |
| 78 | number of A-T SNPs in 2 kb up                                         | 835 | percentage DNA elements in ccds plus 10 kb flanking   | 1592 | frequency of GTGCC in 5 kb flanking |
| 79 | number of C-G SNPs in 2 kb up                                         | 836 | number MER1_type in ccds plus 10 kb flanking          | 1593 | frequency of GTGCG in 5 kb flanking |
| 80 | number of C-T SNPs in 2 kb up                                         | 837 | percentage MER1_type in ccds plus 10 kb flanking      | 1594 | frequency of GTGCT in 5 kb flanking |
| 81 | number of G-T SNPs in 2 kb up                                         | 838 | number MER2_type in ccds plus 10 kb flanking          | 1595 | frequency of GTGGA in 5 kb flanking |
| 82 | number of total SNPs in 2 kb up                                       | 839 | percentage MER2_type in ccds plus 10 kb flanking      | 1596 | frequency of GTGGC in 5 kb flanking |
| 83 | number of transitions in 2 kb up                                      | 840 | number unclassified in ccds plus 10 kb flanking       | 1597 | frequency of GTGGG in 5 kb flanking |
| 84 | number of transversions in 2 kb up                                    | 841 | percentage unclassified in ccds plus 10 kb flanking   | 1598 | frequency of GTGGT in 5 kb flanking |
| 85 | proportion of transitions in 2 kb up relative to total num of SNPs    | 842 | number small RNA in ccds plus 10 kb flanking          | 1599 | frequency of GTGTA in 5 kb flanking |
| 86 | proportion of A-C SNPs in 2 kb up relative to total num SNPs          | 843 | percentage small RNA in ccds plus 10 kb flanking      | 1600 | frequency of GTGTC in 5 kb flanking |
| 87 | proportion of A-G SNPs in 2 kb up relative to total num SNPs          | 844 | number satellites in ccds plus 10 kb flanking         | 1601 | frequency of GTGTG in 5 kb flanking |
| 88 | proportion of A-T SNPs in 2 kb up relative to total num SNPs          | 845 | percentage satellites in ccds plus 10 kb flanking     | 1602 | frequency of GTGTT in 5 kb flanking |
| 89 | proportion of C-G SNPs in 2 kb up relative to total num SNPs          | 846 | number simple repeats in ccds plus 10 kb flanking     | 1603 | frequency of GTTAA in 5 kb flanking |
| 90 | proportion of C-T SNPs in 2 kb up relative to total num SNPs          | 847 | percentage simple repeats in ccds plus 10 kb flanking | 1604 | frequency of GTTAC in 5 kb flanking |

|     |                                                                      |     |                                                                                       |      |                                     |
|-----|----------------------------------------------------------------------|-----|---------------------------------------------------------------------------------------|------|-------------------------------------|
| 91  | proportion of G-T SNPs in 2 kb up relative to total num SNPs         | 848 | number low complexity in ccds plus 10 kb flanking                                     | 1605 | frequency of GTTAG in 5 kb flanking |
| 92  | A-C SNPs per bp in 2 kb up                                           | 849 | percentage low complexity in ccds plus 10 kb flanking                                 | 1606 | frequency of GTTAT in 5 kb flanking |
| 93  | A-G SNPs per bp in 2 kb up                                           | 850 | total repeats (number SINEs + LINEs + LTR + DNA elements) in ccds plus 10 kb flanking | 1607 | frequency of GTTCA in 5 kb flanking |
| 94  | A-T SNPs per bp in 2 kb up                                           | 851 | frequency of AAAAA in 5 kb flanking                                                   | 1608 | frequency of GTTCC in 5 kb flanking |
| 95  | C-G SNPs per bp in 2 kb up                                           | 852 | frequency of AAAAC in 5 kb flanking                                                   | 1609 | frequency of GTTCG in 5 kb flanking |
| 96  | C-T SNPs per bp in 2 kb up                                           | 853 | frequency of AAAAG in 5 kb flanking                                                   | 1610 | frequency of GTTCT in 5 kb flanking |
| 97  | G-T SNPs per bp in 2 kb up                                           | 854 | frequency of AAAAT in 5 kb flanking                                                   | 1611 | frequency of GTTGA in 5 kb flanking |
| 98  | transitions per bp in 2 kb up                                        | 855 | frequency of AAACA in 5 kb flanking                                                   | 1612 | frequency of GTTGC in 5 kb flanking |
| 99  | transversions per bp 2 kb up                                         | 856 | frequency of AAACC in 5 kb flanking                                                   | 1613 | frequency of GTTGG in 5 kb flanking |
| 100 | total snps per bp in 2 kb up                                         | 857 | frequency of AAACG in 5 kb flanking                                                   | 1614 | frequency of GTTGT in 5 kb flanking |
| 101 | number of A-C SNPs in 2 kb down                                      | 858 | frequency of AAACT in 5 kb flanking                                                   | 1615 | frequency of GTTTA in 5 kb flanking |
| 102 | number of A-G SNPs in 2 kb down                                      | 859 | frequency of AAAGA in 5 kb flanking                                                   | 1616 | frequency of GTTTC in 5 kb flanking |
| 103 | number of A-T SNPs in 2 kb down                                      | 860 | frequency of AAAGC in 5 kb flanking                                                   | 1617 | frequency of GTTTG in 5 kb flanking |
| 104 | number of C-G SNPs in 2 kb down                                      | 861 | frequency of AAAGG in 5 kb flanking                                                   | 1618 | frequency of GTTTT in 5 kb flanking |
| 105 | number of C-T SNPs in 2 kb down                                      | 862 | frequency of AAAGT in 5 kb flanking                                                   | 1619 | frequency of TAAAA in 5 kb flanking |
| 106 | number of G-T SNPs in 2 kb down                                      | 863 | frequency of AAATA in 5 kb flanking                                                   | 1620 | frequency of TAAAC in 5 kb flanking |
| 107 | number of total SNPS in 2 kb down                                    | 864 | frequency of AAATC in 5 kb flanking                                                   | 1621 | frequency of TAAAG in 5 kb flanking |
| 108 | number of transitions in 2 kb down                                   | 865 | frequency of AAATG in 5 kb flanking                                                   | 1622 | frequency of TAAAT in 5 kb flanking |
| 109 | number of transversions in 2 kb down                                 | 866 | frequency of AAATT in 5 kb flanking                                                   | 1623 | frequency of TAACA in 5 kb flanking |
| 110 | proportion of transitions in 2 kb down relative to total num of SNPs | 867 | frequency of AACAA in 5 kb flanking                                                   | 1624 | frequency of TAACC in 5 kb flanking |
| 111 | proportion of A-C SNPs in 2 kb down relative to total num SNPs       | 868 | frequency of AACAC in 5 kb flanking                                                   | 1625 | frequency of TAACG in 5 kb flanking |
| 112 | proportion of A-G SNPs in 2 kb down relative to total num SNPs       | 869 | frequency of AACAG in 5 kb flanking                                                   | 1626 | frequency of TAACT in 5 kb flanking |
| 113 | proportion of A-T SNPs in 2 kb down relative to total num SNPs       | 870 | frequency of AACAT in 5 kb flanking                                                   | 1627 | frequency of TAAGA in 5 kb flanking |
| 114 | proportion of C-G SNPs in 2 kb down relative to total num SNPs       | 871 | frequency of AACCA in 5 kb flanking                                                   | 1628 | frequency of TAAGC in 5 kb flanking |
| 115 | proportion of C-T SNPs in 2 kb down relative to total num SNPs       | 872 | frequency of AACCC in 5 kb flanking                                                   | 1629 | frequency of TAAGG in 5 kb flanking |
| 116 | proportion of G-T SNPs in 2 kb down relative to total num SNPs       | 873 | frequency of AACCG in 5 kb flanking                                                   | 1630 | frequency of TAAGT in 5 kb flanking |
| 117 | A-C SNPs per bp in 2 kb down                                         | 874 | frequency of AACCT in 5 kb flanking                                                   | 1631 | frequency of TAATA in 5 kb flanking |
| 118 | A-G SNPs per bp in 2 kb down                                         | 875 | frequency of AACGA in 5 kb flanking                                                   | 1632 | frequency of TAATC in 5 kb flanking |
| 119 | A-T SNPs per bp in 2 kb down                                         | 876 | frequency of AACGC in 5 kb flanking                                                   | 1633 | frequency of TAATG in 5 kb flanking |
| 120 | C-G SNPs per bp in 2 kb down                                         | 877 | frequency of AACGG in 5 kb flanking                                                   | 1634 | frequency of TAATT in 5 kb flanking |
| 121 | C-T SNPs per bp in 2 kb down                                         | 878 | frequency of AACGT in 5 kb flanking                                                   | 1635 | frequency of TACAA in 5 kb flanking |
| 122 | G-T SNPs per bp in 2 kb down                                         | 879 | frequency of AACTA in 5 kb flanking                                                   | 1636 | frequency of TACAC in 5 kb flanking |
| 123 | transitions per bp in 2 kb down                                      | 880 | frequency of AACTC in 5 kb                                                            | 1637 | frequency of TACAG in 5 kb          |

|     |                                                                    |     |                                     |      |                                     |
|-----|--------------------------------------------------------------------|-----|-------------------------------------|------|-------------------------------------|
|     |                                                                    |     | flanking                            |      | flanking                            |
| 124 | transversions per bp 2 kb down                                     | 881 | frequency of AACTG in 5 kb flanking | 1638 | frequency of TACAT in 5 kb flanking |
| 125 | total snps per bp in 2 kb down                                     | 882 | frequency of AACCT in 5 kb flanking | 1639 | frequency of TACCA in 5 kb flanking |
| 126 | number of A-C SNPs in 5 kb up                                      | 883 | frequency of AAGAA in 5 kb flanking | 1640 | frequency of TACCC in 5 kb flanking |
| 127 | number of A-G SNPs in 5 kb up                                      | 884 | frequency of AAGAC in 5 kb flanking | 1641 | frequency of TACCG in 5 kb flanking |
| 128 | number of A-T SNPs in 5 kb up                                      | 885 | frequency of AAGAG in 5 kb flanking | 1642 | frequency of TACCT in 5 kb flanking |
| 129 | number of C-G SNPs in 5 kb up                                      | 886 | frequency of AAGAT in 5 kb flanking | 1643 | frequency of TACGA in 5 kb flanking |
| 130 | number of C-T SNPs in 5 kb up                                      | 887 | frequency of AAGCA in 5 kb flanking | 1644 | frequency of TACGC in 5 kb flanking |
| 131 | number of G-T SNPs in 5 kb up                                      | 888 | frequency of AAGCC in 5 kb flanking | 1645 | frequency of TACGG in 5 kb flanking |
| 132 | number of total SNPs in 5 kb up                                    | 889 | frequency of AAGCG in 5 kb flanking | 1646 | frequency of TACGT in 5 kb flanking |
| 133 | number of transitions in 5 kb up                                   | 890 | frequency of AAGCT in 5 kb flanking | 1647 | frequency of TACTA in 5 kb flanking |
| 134 | number of transversions in 5 kb up                                 | 891 | frequency of AAGGA in 5 kb flanking | 1648 | frequency of TACTC in 5 kb flanking |
| 135 | proportion of transitions in 5 kb up relative to total num of SNPs | 892 | frequency of AAGGC in 5 kb flanking | 1649 | frequency of TACTG in 5 kb flanking |
| 136 | proportion of A-C SNPs in 5 kb up relative to total num SNPs       | 893 | frequency of AAGGG in 5 kb flanking | 1650 | frequency of TACTT in 5 kb flanking |
| 137 | proportion of A-G SNPs in 5 kb up relative to total num SNPs       | 894 | frequency of AAGGT in 5 kb flanking | 1651 | frequency of TAGAA in 5 kb flanking |
| 138 | proportion of A-T SNPs in 5 kb up relative to total num SNPs       | 895 | frequency of AAGTA in 5 kb flanking | 1652 | frequency of TAGAC in 5 kb flanking |
| 139 | proportion of C-G SNPs in 5 kb up relative to total num SNPs       | 896 | frequency of AAGTC in 5 kb flanking | 1653 | frequency of TAGAG in 5 kb flanking |
| 140 | proportion of C-T SNPs in 5 kb up relative to total num SNPs       | 897 | frequency of AAGTG in 5 kb flanking | 1654 | frequency of TAGAT in 5 kb flanking |
| 141 | proportion of G-T SNPs in 5 kb up relative to total num SNPs       | 898 | frequency of AAGTT in 5 kb flanking | 1655 | frequency of TAGCA in 5 kb flanking |
| 142 | A-C SNPs per bp in 5 kb up                                         | 899 | frequency of AATAA in 5 kb flanking | 1656 | frequency of TAGCC in 5 kb flanking |
| 143 | A-G SNPs per bp in 5 kb up                                         | 900 | frequency of AATAC in 5 kb flanking | 1657 | frequency of TAGCG in 5 kb flanking |
| 144 | A-T SNPs per bp in 5 kb up                                         | 901 | frequency of AATAG in 5 kb flanking | 1658 | frequency of TAGCT in 5 kb flanking |
| 145 | C-G SNPs per bp in 5 kb up                                         | 902 | frequency of AATAT in 5 kb flanking | 1659 | frequency of TAGGA in 5 kb flanking |
| 146 | C-T SNPs per bp in 5 kb up                                         | 903 | frequency of AATCA in 5 kb flanking | 1660 | frequency of TAGGC in 5 kb flanking |
| 147 | G-T SNPs per bp in 5 kb up                                         | 904 | frequency of AATCC in 5 kb flanking | 1661 | frequency of TAGGG in 5 kb flanking |
| 148 | transitions per bp in 5 kb up                                      | 905 | frequency of AATCG in 5 kb flanking | 1662 | frequency of TAGGT in 5 kb flanking |
| 149 | transversions per bp 5 kb up                                       | 906 | frequency of AATCT in 5 kb flanking | 1663 | frequency of TAGTA in 5 kb flanking |
| 150 | total snps per bp in 5 kb up                                       | 907 | frequency of AATGA in 5 kb flanking | 1664 | frequency of TAGTC in 5 kb flanking |
| 151 | number of A-C SNPs in 5 kb down                                    | 908 | frequency of AATGC in 5 kb flanking | 1665 | frequency of TAGTG in 5 kb flanking |
| 152 | number of A-G SNPs in 5 kb down                                    | 909 | frequency of AATGG in 5 kb flanking | 1666 | frequency of TAGTT in 5 kb flanking |
| 153 | number of A-T SNPs in 5 kb down                                    | 910 | frequency of AATGT in 5 kb flanking | 1667 | frequency of TATAA in 5 kb flanking |
| 154 | number of C-G SNPs in 5 kb down                                    | 911 | frequency of AATTA in 5 kb flanking | 1668 | frequency of TATAC in 5 kb flanking |
| 155 | number of C-T SNPs in 5 kb down                                    | 912 | frequency of AATTC in 5 kb flanking | 1669 | frequency of TATAG in 5 kb flanking |
| 156 | number of G-T SNPs in 5 kb down                                    | 913 | frequency of AATTG in 5 kb flanking | 1670 | frequency of TATAT in 5 kb flanking |



|     |                                                                      |     |                                     |      |                                     |
|-----|----------------------------------------------------------------------|-----|-------------------------------------|------|-------------------------------------|
| 157 | number of total SNPS in 5 kb down                                    | 914 | frequency of AATTT in 5 kb flanking | 1671 | frequency of TATCA in 5 kb flanking |
| 158 | number of transitions in 5 kb down                                   | 915 | frequency of ACAA in 5 kb flanking  | 1672 | frequency of TATCC in 5 kb flanking |
| 159 | number of transversions in 5 kb down                                 | 916 | frequency of ACAAC in 5 kb flanking | 1673 | frequency of TATCG in 5 kb flanking |
| 160 | proportion of transitions in 5 kb down relative to total num of SNPs | 917 | frequency of ACAAG in 5 kb flanking | 1674 | frequency of TATCT in 5 kb flanking |
| 161 | proportion of A-C SNPs in 5 kb down relative to total num SNPs       | 918 | frequency of ACAAT in 5 kb flanking | 1675 | frequency of TATGA in 5 kb flanking |
| 162 | proportion of A-G SNPs in 5 kb down relative to total num SNPs       | 919 | frequency of ACACA in 5 kb flanking | 1676 | frequency of TATGC in 5 kb flanking |
| 163 | proportion of A-T SNPs in 5 kb down relative to total num SNPs       | 920 | frequency of ACACC in 5 kb flanking | 1677 | frequency of TATGG in 5 kb flanking |
| 164 | proportion of C-G SNPs in 5 kb down relative to total num SNPs       | 921 | frequency of ACACG in 5 kb flanking | 1678 | frequency of TATGT in 5 kb flanking |
| 165 | proportion of C-T SNPs in 5 kb down relative to total num SNPs       | 922 | frequency of ACACT in 5 kb flanking | 1679 | frequency of TATTA in 5 kb flanking |
| 166 | proportion of G-T SNPs in 5 kb down relative to total num SNPs       | 923 | frequency of ACAGA in 5 kb flanking | 1680 | frequency of TATTC in 5 kb flanking |
| 167 | A-C SNPs per bp in 5 kb down                                         | 924 | frequency of ACAGC in 5 kb flanking | 1681 | frequency of TATTG in 5 kb flanking |
| 168 | A-G SNPs per bp in 5 kb down                                         | 925 | frequency of ACAGG in 5 kb flanking | 1682 | frequency of TATTT in 5 kb flanking |
| 169 | A-T SNPs per bp in 5 kb down                                         | 926 | frequency of ACAGT in 5 kb flanking | 1683 | frequency of TCAAA in 5 kb flanking |
| 170 | C-G SNPs per bp in 5 kb down                                         | 927 | frequency of ACATA in 5 kb flanking | 1684 | frequency of TCAAC in 5 kb flanking |
| 171 | C-T SNPs per bp in 5 kb down                                         | 928 | frequency of ACATC in 5 kb flanking | 1685 | frequency of TCAAG in 5 kb flanking |
| 172 | G-T SNPs per bp in 5 kb down                                         | 929 | frequency of ACATG in 5 kb flanking | 1686 | frequency of TCAAT in 5 kb flanking |
| 173 | transitions per bp in 5 kb down                                      | 930 | frequency of ACATT in 5 kb flanking | 1687 | frequency of TCACA in 5 kb flanking |
| 174 | transversions per bp 5 kb down                                       | 931 | frequency of ACCAA in 5 kb flanking | 1688 | frequency of TCACC in 5 kb flanking |
| 175 | total snps per bp in 5 kb down                                       | 932 | frequency of ACCAC in 5 kb flanking | 1689 | frequency of TCACG in 5 kb flanking |
| 176 | number of A-C SNPs in 10 kb up                                       | 933 | frequency of ACCAG in 5 kb flanking | 1690 | frequency of TCACT in 5 kb flanking |
| 177 | number of A-G SNPs in 10 kb up                                       | 934 | frequency of ACCAT in 5 kb flanking | 1691 | frequency of TCAGA in 5 kb flanking |
| 178 | number of A-T SNPs in 10 kb up                                       | 935 | frequency of ACCCA in 5 kb flanking | 1692 | frequency of TCAGC in 5 kb flanking |
| 179 | number of C-G SNPs in 10 kb up                                       | 936 | frequency of ACCCC in 5 kb flanking | 1693 | frequency of TCAGG in 5 kb flanking |
| 180 | number of C-T SNPs in 10 kb up                                       | 937 | frequency of ACCCG in 5 kb flanking | 1694 | frequency of TCAGT in 5 kb flanking |
| 181 | number of G-T SNPs in 10 kb up                                       | 938 | frequency of ACCCT in 5 kb flanking | 1695 | frequency of TCATA in 5 kb flanking |
| 182 | number of total SNPS in 10 kb up                                     | 939 | frequency of ACCGA in 5 kb flanking | 1696 | frequency of TCATC in 5 kb flanking |
| 183 | number of transitions in 10 kb up                                    | 940 | frequency of ACCGC in 5 kb flanking | 1697 | frequency of TCATG in 5 kb flanking |
| 184 | number of transversions in 10 kb up                                  | 941 | frequency of ACCGG in 5 kb flanking | 1698 | frequency of TCATT in 5 kb flanking |
| 185 | proportion of transitions in 10 kb up relative to total num of SNPs  | 942 | frequency of ACCGT in 5 kb flanking | 1699 | frequency of TCCAA in 5 kb flanking |
| 186 | proportion of A-C SNPs in 10 kb up relative to total num SNPs        | 943 | frequency of ACCTA in 5 kb flanking | 1700 | frequency of TCCAC in 5 kb flanking |
| 187 | proportion of A-G SNPs in 10 kb up relative to total num SNPs        | 944 | frequency of ACCTC in 5 kb flanking | 1701 | frequency of TCCAG in 5 kb flanking |
| 188 | proportion of A-T SNPs in 10 kb up relative to total num SNPs        | 945 | frequency of ACCTG in 5 kb flanking | 1702 | frequency of TCCAT in 5 kb flanking |
| 189 | proportion of C-G SNPs in 10 kb up relative to total num SNPs        | 946 | frequency of ACCTT in 5 kb flanking | 1703 | frequency of TCCCA in 5 kb flanking |

|     |                                                                       |     |                                     |      |                                     |
|-----|-----------------------------------------------------------------------|-----|-------------------------------------|------|-------------------------------------|
| 190 | proportion of C-T SNPs in 10 kb up relative to total num SNPs         | 947 | frequency of ACGAA in 5 kb flanking | 1704 | frequency of TCCCC in 5 kb flanking |
| 191 | proportion of G-T SNPs in 10 kb up relative to total num SNPs         | 948 | frequency of ACGAC in 5 kb flanking | 1705 | frequency of TCCCG in 5 kb flanking |
| 192 | A-C SNPs per bp in 10 kb up                                           | 949 | frequency of ACGAG in 5 kb flanking | 1706 | frequency of TCCCT in 5 kb flanking |
| 193 | A-G SNPs per bp in 10 kb up                                           | 950 | frequency of ACGAT in 5 kb flanking | 1707 | frequency of TCCGA in 5 kb flanking |
| 194 | A-T SNPs per bp in 10 kb up                                           | 951 | frequency of ACGCA in 5 kb flanking | 1708 | frequency of TCCGC in 5 kb flanking |
| 195 | C-G SNPs per bp in 10 kb up                                           | 952 | frequency of ACGCC in 5 kb flanking | 1709 | frequency of TCCGG in 5 kb flanking |
| 196 | C-T SNPs per bp in 10 kb up                                           | 953 | frequency of ACGCG in 5 kb flanking | 1710 | frequency of TCCGT in 5 kb flanking |
| 197 | G-T SNPs per bp in 10 kb up                                           | 954 | frequency of ACGCT in 5 kb flanking | 1711 | frequency of TCCTA in 5 kb flanking |
| 198 | transitions per bp in 10 kb up                                        | 955 | frequency of ACGGA in 5 kb flanking | 1712 | frequency of TCCTC in 5 kb flanking |
| 199 | transversions per bp 10 kb up                                         | 956 | frequency of ACGGC in 5 kb flanking | 1713 | frequency of TCCTG in 5 kb flanking |
| 200 | total snps per bp in 10 kb up                                         | 957 | frequency of ACGGG in 5 kb flanking | 1714 | frequency of TCCTT in 5 kb flanking |
| 201 | number of A-C SNPs in 10 kb down                                      | 958 | frequency of ACGGT in 5 kb flanking | 1715 | frequency of TCGAA in 5 kb flanking |
| 202 | number of A-G SNPs in 10 kb down                                      | 959 | frequency of ACGTA in 5 kb flanking | 1716 | frequency of TCGAC in 5 kb flanking |
| 203 | number of A-T SNPs in 10 kb down                                      | 960 | frequency of ACGTC in 5 kb flanking | 1717 | frequency of TCGAG in 5 kb flanking |
| 204 | number of C-G SNPs in 10 kb down                                      | 961 | frequency of ACGTG in 5 kb flanking | 1718 | frequency of TCGAT in 5 kb flanking |
| 205 | number of C-T SNPs in 10 kb down                                      | 962 | frequency of ACGTT in 5 kb flanking | 1719 | frequency of TCGCA in 5 kb flanking |
| 206 | number of G-T SNPs in 10 kb down                                      | 963 | frequency of ACTAA in 5 kb flanking | 1720 | frequency of TCGCC in 5 kb flanking |
| 207 | number of total SNPS in 10 kb down                                    | 964 | frequency of ACTAC in 5 kb flanking | 1721 | frequency of TCGCG in 5 kb flanking |
| 208 | number of transitions in 10 kb down                                   | 965 | frequency of ACTAG in 5 kb flanking | 1722 | frequency of TCGCT in 5 kb flanking |
| 209 | number of transversions in 10 kb down                                 | 966 | frequency of ACTAT in 5 kb flanking | 1723 | frequency of TCGGA in 5 kb flanking |
| 210 | proportion of transitions in 10 kb down relative to total num of SNPs | 967 | frequency of ACTCA in 5 kb flanking | 1724 | frequency of TCGGC in 5 kb flanking |
| 211 | proportion of A-C SNPs in 10 kb down relative to total num SNPs       | 968 | frequency of ACTCC in 5 kb flanking | 1725 | frequency of TCGGG in 5 kb flanking |
| 212 | proportion of A-G SNPs in 10 kb down relative to total num SNPs       | 969 | frequency of ACTCG in 5 kb flanking | 1726 | frequency of TCGGT in 5 kb flanking |
| 213 | proportion of A-T SNPs in 10 kb down relative to total num SNPs       | 970 | frequency of ACTCT in 5 kb flanking | 1727 | frequency of TCGTA in 5 kb flanking |
| 214 | proportion of C-G SNPs in 10 kb down relative to total num SNPs       | 971 | frequency of ACTGA in 5 kb flanking | 1728 | frequency of TCGTC in 5 kb flanking |
| 215 | proportion of C-T SNPs in 10 kb down relative to total num SNPs       | 972 | frequency of ACTGC in 5 kb flanking | 1729 | frequency of TCGTG in 5 kb flanking |
| 216 | proportion of G-T SNPs in 10 kb down relative to total num SNPs       | 973 | frequency of ACTGG in 5 kb flanking | 1730 | frequency of TCGTT in 5 kb flanking |
| 217 | A-C SNPs per bp in 10 kb down                                         | 974 | frequency of ACTGT in 5 kb flanking | 1731 | frequency of TCTAA in 5 kb flanking |
| 218 | A-G SNPs per bp in 10 kb down                                         | 975 | frequency of ACTTA in 5 kb flanking | 1732 | frequency of TCTAC in 5 kb flanking |
| 219 | A-T SNPs per bp in 10 kb down                                         | 976 | frequency of ACTTC in 5 kb flanking | 1733 | frequency of TCTAG in 5 kb flanking |
| 220 | C-G SNPs per bp in 10 kb down                                         | 977 | frequency of ACTTG in 5 kb flanking | 1734 | frequency of TCTAT in 5 kb flanking |
| 221 | C-T SNPs per bp in 10 kb down                                         | 978 | frequency of ACTTT in 5 kb flanking | 1735 | frequency of TCTCA in 5 kb flanking |
| 222 | G-T SNPs per bp in 10 kb down                                         | 979 | frequency of AGAAA in 5 kb flanking | 1736 | frequency of TCTCC in 5 kb flanking |

|     |                                                                                   |      |                                     |      |                                     |
|-----|-----------------------------------------------------------------------------------|------|-------------------------------------|------|-------------------------------------|
| 223 | transitions per bp in 10 kb down                                                  | 980  | frequency of AGAAC in 5 kb flanking | 1737 | frequency of TCTCG in 5 kb flanking |
| 224 | transversions per bp 10 kb down                                                   | 981  | frequency of AGAAG in 5 kb flanking | 1738 | frequency of TCTCT in 5 kb flanking |
| 225 | total snps per bp in 10 kb down                                                   | 982  | frequency of AGAAT in 5 kb flanking | 1739 | frequency of TCTGA in 5 kb flanking |
| 226 | number of A-C SNPs in ccds plus 2kb flanking                                      | 983  | frequency of AGACA in 5 kb flanking | 1740 | frequency of TCTGC in 5 kb flanking |
| 227 | number of A-G SNPs in ccds plus 2kb flanking                                      | 984  | frequency of AGACC in 5 kb flanking | 1741 | frequency of TCTGG in 5 kb flanking |
| 228 | number of A-T SNPs in ccds plus 2kb flanking                                      | 985  | frequency of AGACG in 5 kb flanking | 1742 | frequency of TCTGT in 5 kb flanking |
| 229 | number of C-G SNPs in ccds plus 2kb flanking                                      | 986  | frequency of AGACT in 5 kb flanking | 1743 | frequency of TCTTA in 5 kb flanking |
| 230 | number of C-T SNPs in ccds plus 2kb flanking                                      | 987  | frequency of AGAGA in 5 kb flanking | 1744 | frequency of TCTTC in 5 kb flanking |
| 231 | number of G-T SNPs in ccds plus 2kb flanking                                      | 988  | frequency of AGAGC in 5 kb flanking | 1745 | frequency of TCTTG in 5 kb flanking |
| 232 | number of total SNPs in ccds plus 2kb flanking                                    | 989  | frequency of AGAGG in 5 kb flanking | 1746 | frequency of TCTTT in 5 kb flanking |
| 233 | number of transitions in ccds plus 2kb flanking                                   | 990  | frequency of AGAGT in 5 kb flanking | 1747 | frequency of TGAAA in 5 kb flanking |
| 234 | number of transversions in ccds plus 2kb flanking                                 | 991  | frequency of AGATA in 5 kb flanking | 1748 | frequency of TGAAC in 5 kb flanking |
| 235 | proportion of transitions in ccds plus 2kb flanking relative to total num of SNPs | 992  | frequency of AGATC in 5 kb flanking | 1749 | frequency of TGAAG in 5 kb flanking |
| 236 | proportion of A-C SNPs in ccds plus 2kb flanking relative to total num SNPs       | 993  | frequency of AGATG in 5 kb flanking | 1750 | frequency of TGAAT in 5 kb flanking |
| 237 | proportion of A-G SNPs in ccds plus 2kb flanking relative to total num SNPs       | 994  | frequency of AGATT in 5 kb flanking | 1751 | frequency of TGACA in 5 kb flanking |
| 238 | proportion of A-T SNPs in ccds plus 2kb flanking relative to total num SNPs       | 995  | frequency of AGCAA in 5 kb flanking | 1752 | frequency of TGACC in 5 kb flanking |
| 239 | proportion of C-G SNPs in ccds plus 2kb flanking relative to total num SNPs       | 996  | frequency of AGCAC in 5 kb flanking | 1753 | frequency of TGACG in 5 kb flanking |
| 240 | proportion of C-T SNPs in ccds plus 2kb flanking relative to total num SNPs       | 997  | frequency of AGCAG in 5 kb flanking | 1754 | frequency of TGACT in 5 kb flanking |
| 241 | proportion of G-T SNPs in ccds plus 2kb flanking relative to total num SNPs       | 998  | frequency of AGCAT in 5 kb flanking | 1755 | frequency of TGAGA in 5 kb flanking |
| 242 | A-C SNPs per bp in ccds plus 2kb flanking                                         | 999  | frequency of AGCCA in 5 kb flanking | 1756 | frequency of TGAGC in 5 kb flanking |
| 243 | A-G SNPs per bp in ccds plus 2kb flanking                                         | 1000 | frequency of AGCCC in 5 kb flanking | 1757 | frequency of TGAGG in 5 kb flanking |
| 244 | A-T SNPs per bp in ccds plus 2kb flanking                                         | 1001 | frequency of AGCCG in 5 kb flanking | 1758 | frequency of TGAGT in 5 kb flanking |
| 245 | C-G SNPs per bp in ccds plus 2kb flanking                                         | 1002 | frequency of AGCCT in 5 kb flanking | 1759 | frequency of TGATA in 5 kb flanking |
| 246 | C-T SNPs per bp in ccds plus 2kb flanking                                         | 1003 | frequency of AGCGA in 5 kb flanking | 1760 | frequency of TGATC in 5 kb flanking |
| 247 | G-T SNPs per bp in ccds plus 2kb flanking                                         | 1004 | frequency of AGCGC in 5 kb flanking | 1761 | frequency of TGATG in 5 kb flanking |
| 248 | transitions per bp in ccds plus 2kb flanking                                      | 1005 | frequency of AGCGG in 5 kb flanking | 1762 | frequency of TGATT in 5 kb flanking |
| 249 | transversions per bp ccds plus 2kb flanking                                       | 1006 | frequency of AGCGT in 5 kb flanking | 1763 | frequency of TGCAA in 5 kb flanking |
| 250 | total snps per bp in ccds plus 2kb flanking                                       | 1007 | frequency of AGCTA in 5 kb flanking | 1764 | frequency of TGCAC in 5 kb flanking |
| 251 | number of A-C SNPs in ccds plus 5kb flanking                                      | 1008 | frequency of AGCTC in 5 kb flanking | 1765 | frequency of TGCAG in 5 kb flanking |

|     |                                                                                   |      |                                     |      |                                     |
|-----|-----------------------------------------------------------------------------------|------|-------------------------------------|------|-------------------------------------|
| 252 | number of A-G SNPs in ccds plus 5kb flanking                                      | 1009 | frequency of AGCTG in 5 kb flanking | 1766 | frequency of TGCAT in 5 kb flanking |
| 253 | number of A-T SNPs in ccds plus 5kb flanking                                      | 1010 | frequency of AGCTT in 5 kb flanking | 1767 | frequency of TGCCA in 5 kb flanking |
| 254 | number of C-G SNPs in ccds plus 5kb flanking                                      | 1011 | frequency of AGGAA in 5 kb flanking | 1768 | frequency of TGCCC in 5 kb flanking |
| 255 | number of C-T SNPs in ccds plus 5kb flanking                                      | 1012 | frequency of AGGAC in 5 kb flanking | 1769 | frequency of TGCCG in 5 kb flanking |
| 256 | number of G-T SNPs in ccds plus 5kb flanking                                      | 1013 | frequency of AGGAG in 5 kb flanking | 1770 | frequency of TGCCT in 5 kb flanking |
| 257 | number of total SNPs in ccds plus 5kb flanking                                    | 1014 | frequency of AGGAT in 5 kb flanking | 1771 | frequency of TGCGA in 5 kb flanking |
| 258 | number of transitions in ccds plus 5kb flanking                                   | 1015 | frequency of AGGCA in 5 kb flanking | 1772 | frequency of TGCGC in 5 kb flanking |
| 259 | number of transversions in ccds plus 5kb flanking                                 | 1016 | frequency of AGGCC in 5 kb flanking | 1773 | frequency of TGCGG in 5 kb flanking |
| 260 | proportion of transitions in ccds plus 5kb flanking relative to total num of SNPs | 1017 | frequency of AGGCG in 5 kb flanking | 1774 | frequency of TGCGT in 5 kb flanking |
| 261 | proportion of A-C SNPs in ccds plus 5kb flanking relative to total num SNPs       | 1018 | frequency of AGGCT in 5 kb flanking | 1775 | frequency of TGCTA in 5 kb flanking |
| 262 | proportion of A-G SNPs in ccds plus 5kb flanking relative to total num SNPs       | 1019 | frequency of AGGGA in 5 kb flanking | 1776 | frequency of TGCTC in 5 kb flanking |
| 263 | proportion of A-T SNPs in ccds plus 5kb flanking relative to total num SNPs       | 1020 | frequency of AGGGC in 5 kb flanking | 1777 | frequency of TGCTG in 5 kb flanking |
| 264 | proportion of C-G SNPs in ccds plus 5kb flanking relative to total num SNPs       | 1021 | frequency of AGGGG in 5 kb flanking | 1778 | frequency of TGCTT in 5 kb flanking |
| 265 | proportion of C-T SNPs in ccds plus 5kb flanking relative to total num SNPs       | 1022 | frequency of AGGGT in 5 kb flanking | 1779 | frequency of TGGAA in 5 kb flanking |
| 266 | proportion of G-T SNPs in ccds plus 5kb flanking relative to total num SNPs       | 1023 | frequency of AGGTA in 5 kb flanking | 1780 | frequency of TGGAC in 5 kb flanking |
| 267 | A-C SNPs per bp in ccds plus 5kb flanking                                         | 1024 | frequency of AGGTC in 5 kb flanking | 1781 | frequency of TGGAG in 5 kb flanking |
| 268 | A-G SNPs per bp in ccds plus 5kb flanking                                         | 1025 | frequency of AGGTG in 5 kb flanking | 1782 | frequency of TGGAT in 5 kb flanking |
| 269 | A-T SNPs per bp in ccds plus 5kb flanking                                         | 1026 | frequency of AGGTT in 5 kb flanking | 1783 | frequency of TGGCA in 5 kb flanking |
| 270 | C-G SNPs per bp in ccds plus 5kb flanking                                         | 1027 | frequency of AGTAA in 5 kb flanking | 1784 | frequency of TGGCC in 5 kb flanking |
| 271 | C-T SNPs per bp in ccds plus 5kb flanking                                         | 1028 | frequency of AGTAC in 5 kb flanking | 1785 | frequency of TGGCG in 5 kb flanking |
| 272 | G-T SNPs per bp in ccds plus 5kb flanking                                         | 1029 | frequency of AGTAG in 5 kb flanking | 1786 | frequency of TGGCT in 5 kb flanking |
| 273 | transitions per bp in ccds plus 5kb flanking                                      | 1030 | frequency of AGTAT in 5 kb flanking | 1787 | frequency of TGGGA in 5 kb flanking |
| 274 | transversions per bp ccds plus 5kb flanking                                       | 1031 | frequency of AGTCA in 5 kb flanking | 1788 | frequency of TGGGC in 5 kb flanking |
| 275 | total snps per bp in ccds plus 5kb flanking                                       | 1032 | frequency of AGTCC in 5 kb flanking | 1789 | frequency of TGGGG in 5 kb flanking |
| 276 | number of A-C SNPs in ccds plus 10kb flanking                                     | 1033 | frequency of AGTCG in 5 kb flanking | 1790 | frequency of TGGGT in 5 kb flanking |
| 277 | number of A-G SNPs in ccds plus 10kb flanking                                     | 1034 | frequency of AGTCT in 5 kb flanking | 1791 | frequency of TGGTA in 5 kb flanking |
| 278 | number of A-T SNPs in ccds plus 10kb flanking                                     | 1035 | frequency of AGTGA in 5 kb flanking | 1792 | frequency of TGGTC in 5 kb flanking |
| 279 | number of C-G SNPs in ccds plus 10kb flanking                                     | 1036 | frequency of AGTGC in 5 kb flanking | 1793 | frequency of TGGTG in 5 kb flanking |

|     |                                                                                    |      |                                     |      |                                      |
|-----|------------------------------------------------------------------------------------|------|-------------------------------------|------|--------------------------------------|
| 280 | number of C-T SNPs in ccds plus 10kb flanking                                      | 1037 | frequency of AGTGG in 5 kb flanking | 1794 | frequency of TGGTT in 5 kb flanking  |
| 281 | number of G-T SNPs in ccds plus 10kb flanking                                      | 1038 | frequency of AGTGT in 5 kb flanking | 1795 | frequency of TGTAA in 5 kb flanking  |
| 282 | number of total SNPS in ccds plus 10kb flanking                                    | 1039 | frequency of AGTTA in 5 kb flanking | 1796 | frequency of TGTAC in 5 kb flanking  |
| 283 | number of transitions in ccds plus 10kb flanking                                   | 1040 | frequency of AGTTC in 5 kb flanking | 1797 | frequency of TGTAG in 5 kb flanking  |
| 284 | number of transversions in ccds plus 10kb flanking                                 | 1041 | frequency of AGTTG in 5 kb flanking | 1798 | frequency of TGTAT in 5 kb flanking  |
| 285 | proportion of transitions in ccds plus 10kb flanking relative to total num of SNPs | 1042 | frequency of AGTTT in 5 kb flanking | 1799 | frequency of TGTCA in 5 kb flanking  |
| 286 | proportion of A-C SNPs in ccds plus 10kb flanking relative to total num SNPs       | 1043 | frequency of ATAAA in 5 kb flanking | 1800 | frequency of TGTCC in 5 kb flanking  |
| 287 | proportion of A-G SNPs in ccds plus 10kb flanking relative to total num SNPs       | 1044 | frequency of ATAAC in 5 kb flanking | 1801 | frequency of TGTCCG in 5 kb flanking |
| 288 | proportion of A-T SNPs in ccds plus 10kb flanking relative to total num SNPs       | 1045 | frequency of ATAAG in 5 kb flanking | 1802 | frequency of TGTCT in 5 kb flanking  |
| 289 | proportion of C-G SNPs in ccds plus 10kb flanking relative to total num SNPs       | 1046 | frequency of ATAAT in 5 kb flanking | 1803 | frequency of TGTGA in 5 kb flanking  |
| 290 | proportion of C-T SNPs in ccds plus 10kb flanking relative to total num SNPs       | 1047 | frequency of ATACA in 5 kb flanking | 1804 | frequency of TGTGC in 5 kb flanking  |
| 291 | proportion of G-T SNPs in ccds plus 10kb flanking relative to total num SNPs       | 1048 | frequency of ATACC in 5 kb flanking | 1805 | frequency of TGTGG in 5 kb flanking  |
| 292 | A-C SNPs per bp in ccds plus 10kb flanking                                         | 1049 | frequency of ATACG in 5 kb flanking | 1806 | frequency of TGTGT in 5 kb flanking  |
| 293 | A-G SNPs per bp in ccds plus 10kb flanking                                         | 1050 | frequency of ATACT in 5 kb flanking | 1807 | frequency of TGTTA in 5 kb flanking  |
| 294 | A-T SNPs per bp in ccds plus 10kb flanking                                         | 1051 | frequency of ATAGA in 5 kb flanking | 1808 | frequency of TGTTC in 5 kb flanking  |
| 295 | C-G SNPs per bp in ccds plus 10kb flanking                                         | 1052 | frequency of ATAGC in 5 kb flanking | 1809 | frequency of TGTTG in 5 kb flanking  |
| 296 | C-T SNPs per bp in ccds plus 10kb flanking                                         | 1053 | frequency of ATAGG in 5 kb flanking | 1810 | frequency of TGTTT in 5 kb flanking  |
| 297 | G-T SNPs per bp in ccds plus 10kb flanking                                         | 1054 | frequency of ATAGT in 5 kb flanking | 1811 | frequency of TTAAC in 5 kb flanking  |
| 298 | transitions per bp in ccds plus 10kb flanking                                      | 1055 | frequency of ATATA in 5 kb flanking | 1812 | frequency of TTAAC in 5 kb flanking  |
| 299 | transversions per bp ccds plus 10kb flanking                                       | 1056 | frequency of ATATC in 5 kb flanking | 1813 | frequency of TTAAG in 5 kb flanking  |
| 300 | total snps per bp in ccds plus 10kb flanking                                       | 1057 | frequency of ATATG in 5 kb flanking | 1814 | frequency of TTAAT in 5 kb flanking  |
| 301 | number of A-C SNPs in 2kb flanking                                                 | 1058 | frequency of ATATT in 5 kb flanking | 1815 | frequency of TTACA in 5 kb flanking  |
| 302 | number of A-G SNPs in 2kb flanking                                                 | 1059 | frequency of ATCAA in 5 kb flanking | 1816 | frequency of TTACC in 5 kb flanking  |
| 303 | number of A-T SNPs in 2kb flanking                                                 | 1060 | frequency of ATCAC in 5 kb flanking | 1817 | frequency of TTACG in 5 kb flanking  |
| 304 | number of C-G SNPs in 2kb flanking                                                 | 1061 | frequency of ATCAG in 5 kb flanking | 1818 | frequency of TTAAC in 5 kb flanking  |
| 305 | number of C-T SNPs in 2kb flanking                                                 | 1062 | frequency of ATCAT in 5 kb flanking | 1819 | frequency of TTAGA in 5 kb flanking  |
| 306 | number of G-T SNPs in 2kb flanking                                                 | 1063 | frequency of ATCCA in 5 kb flanking | 1820 | frequency of TTAGC in 5 kb flanking  |
| 307 | number of total SNPS in 2kb flanking                                               | 1064 | frequency of ATCCC in 5 kb flanking | 1821 | frequency of TTAGG in 5 kb flanking  |
| 308 | number of transitions in 2kb flanking                                              | 1065 | frequency of ATCCG in 5 kb flanking | 1822 | frequency of TTAGT in 5 kb flanking  |

|     |                                                                         |      |                                     |      |                                     |
|-----|-------------------------------------------------------------------------|------|-------------------------------------|------|-------------------------------------|
|     |                                                                         |      | flanking                            |      | flanking                            |
| 309 | number of transversions in 2kb flanking                                 | 1066 | frequency of ATCCT in 5 kb flanking | 1823 | frequency of TTATA in 5 kb flanking |
| 310 | proportion of transitions in 2kb flanking relative to total num of SNPs | 1067 | frequency of ATCGA in 5 kb flanking | 1824 | frequency of TTATC in 5 kb flanking |
| 311 | proportion of A-C SNPs in 2kb flanking relative to total num SNPs       | 1068 | frequency of ATCGC in 5 kb flanking | 1825 | frequency of TTATG in 5 kb flanking |
| 312 | proportion of A-G SNPs in 2kb flanking relative to total num SNPs       | 1069 | frequency of ATCGG in 5 kb flanking | 1826 | frequency of TTATT in 5 kb flanking |
| 313 | proportion of A-T SNPs in 2kb flanking relative to total num SNPs       | 1070 | frequency of ATCGT in 5 kb flanking | 1827 | frequency of TTCAA in 5 kb flanking |
| 314 | proportion of C-G SNPs in 2kb flanking relative to total num SNPs       | 1071 | frequency of ATCTA in 5 kb flanking | 1828 | frequency of TTCAC in 5 kb flanking |
| 315 | proportion of C-T SNPs in 2kb flanking relative to total num SNPs       | 1072 | frequency of ATCTC in 5 kb flanking | 1829 | frequency of TTCAG in 5 kb flanking |
| 316 | proportion of G-T SNPs in 2kb flanking relative to total num SNPs       | 1073 | frequency of ATCTG in 5 kb flanking | 1830 | frequency of TTCAT in 5 kb flanking |
| 317 | A-C SNPs per bp in 2kb flanking                                         | 1074 | frequency of ATCTT in 5 kb flanking | 1831 | frequency of TTCCA in 5 kb flanking |
| 318 | A-G SNPs per bp in 2kb flanking                                         | 1075 | frequency of ATGAA in 5 kb flanking | 1832 | frequency of TTCCC in 5 kb flanking |
| 319 | A-T SNPs per bp in 2kb flanking                                         | 1076 | frequency of ATGAC in 5 kb flanking | 1833 | frequency of TTCCG in 5 kb flanking |
| 320 | C-G SNPs per bp in 2kb flanking                                         | 1077 | frequency of ATGAG in 5 kb flanking | 1834 | frequency of TTCCT in 5 kb flanking |
| 321 | C-T SNPs per bp in 2kb flanking                                         | 1078 | frequency of ATGAT in 5 kb flanking | 1835 | frequency of TTCGA in 5 kb flanking |
| 322 | G-T SNPs per bp in 2kb flanking                                         | 1079 | frequency of ATGCA in 5 kb flanking | 1836 | frequency of TTCGC in 5 kb flanking |
| 323 | transitions per bp in 2kb flanking                                      | 1080 | frequency of ATGCC in 5 kb flanking | 1837 | frequency of TTCGG in 5 kb flanking |
| 324 | transversions per bp 2kb flanking                                       | 1081 | frequency of ATGCG in 5 kb flanking | 1838 | frequency of TTCGT in 5 kb flanking |
| 325 | total snps per bp in 2kb flanking                                       | 1082 | frequency of ATGCT in 5 kb flanking | 1839 | frequency of TTCTA in 5 kb flanking |
| 326 | number of A-C SNPs in 5kb flanking                                      | 1083 | frequency of ATGGA in 5 kb flanking | 1840 | frequency of TTCTC in 5 kb flanking |
| 327 | number of A-G SNPs in 5kb flanking                                      | 1084 | frequency of ATGGC in 5 kb flanking | 1841 | frequency of TTCTG in 5 kb flanking |
| 328 | number of A-T SNPs in 5kb flanking                                      | 1085 | frequency of ATGGG in 5 kb flanking | 1842 | frequency of TTCTT in 5 kb flanking |
| 329 | number of C-G SNPs in 5kb flanking                                      | 1086 | frequency of ATGGT in 5 kb flanking | 1843 | frequency of TTGAA in 5 kb flanking |
| 330 | number of C-T SNPs in 5kb flanking                                      | 1087 | frequency of ATGTA in 5 kb flanking | 1844 | frequency of TTGAC in 5 kb flanking |
| 331 | number of G-T SNPs in 5kb flanking                                      | 1088 | frequency of ATGTC in 5 kb flanking | 1845 | frequency of TTGAG in 5 kb flanking |
| 332 | number of total SNPs in 5kb flanking                                    | 1089 | frequency of ATGTG in 5 kb flanking | 1846 | frequency of TTGAT in 5 kb flanking |
| 333 | number of transitions in 5kb flanking                                   | 1090 | frequency of ATGTT in 5 kb flanking | 1847 | frequency of TTGCA in 5 kb flanking |
| 334 | number of transversions in 5kb flanking                                 | 1091 | frequency of ATTAA in 5 kb flanking | 1848 | frequency of TTGCC in 5 kb flanking |
| 335 | proportion of transitions in 5kb flanking relative to total num of SNPs | 1092 | frequency of ATTAC in 5 kb flanking | 1849 | frequency of TTGCG in 5 kb flanking |
| 336 | proportion of A-C SNPs in 5kb flanking relative to total num SNPs       | 1093 | frequency of ATTAG in 5 kb flanking | 1850 | frequency of TTGCT in 5 kb flanking |
| 337 | proportion of A-G SNPs in 5kb flanking relative to total num SNPs       | 1094 | frequency of ATTAT in 5 kb flanking | 1851 | frequency of TTGGA in 5 kb flanking |
| 338 | proportion of A-T SNPs in 5kb flanking relative to total num SNPs       | 1095 | frequency of ATTCA in 5 kb flanking | 1852 | frequency of TTGGC in 5 kb flanking |
| 339 | proportion of C-G SNPs in 5kb flanking relative to total num SNPs       | 1096 | frequency of ATTCC in 5 kb flanking | 1853 | frequency of TTGGG in 5 kb flanking |

|     |                                                                          |      |                                     |      |                                                              |
|-----|--------------------------------------------------------------------------|------|-------------------------------------|------|--------------------------------------------------------------|
| 340 | proportion of C-T SNPs in 5kb flanking relative to total num SNPs        | 1097 | frequency of ATTCG in 5 kb flanking | 1854 | frequency of TTGGT in 5 kb flanking                          |
| 341 | proportion of G-T SNPs in 5kb flanking relative to total num SNPs        | 1098 | frequency of ATTCT in 5 kb flanking | 1855 | frequency of TTGTA in 5 kb flanking                          |
| 342 | A-C SNPs per bp in 5kb flanking                                          | 1099 | frequency of ATTGA in 5 kb flanking | 1856 | frequency of TTGTC in 5 kb flanking                          |
| 343 | A-G SNPs per bp in 5kb flanking                                          | 1100 | frequency of ATTGC in 5 kb flanking | 1857 | frequency of TTGTG in 5 kb flanking                          |
| 344 | A-T SNPs per bp in 5kb flanking                                          | 1101 | frequency of ATTGG in 5 kb flanking | 1858 | frequency of TTGTT in 5 kb flanking                          |
| 345 | C-G SNPs per bp in 5kb flanking                                          | 1102 | frequency of ATTGT in 5 kb flanking | 1859 | frequency of TTTAA in 5 kb flanking                          |
| 346 | C-T SNPs per bp in 5kb flanking                                          | 1103 | frequency of ATTTA in 5 kb flanking | 1860 | frequency of TTTAC in 5 kb flanking                          |
| 347 | G-T SNPs per bp in 5kb flanking                                          | 1104 | frequency of ATTTC in 5 kb flanking | 1861 | frequency of TTTAG in 5 kb flanking                          |
| 348 | transitions per bp in 5kb flanking                                       | 1105 | frequency of ATTTG in 5 kb flanking | 1862 | frequency of TTTAT in 5 kb flanking                          |
| 349 | transversions per bp 5kb flanking                                        | 1106 | frequency of ATTTT in 5 kb flanking | 1863 | frequency of TTTCA in 5 kb flanking                          |
| 350 | total snps per bp in 5kb flanking                                        | 1107 | frequency of CAAAA in 5 kb flanking | 1864 | frequency of TTTCC in 5 kb flanking                          |
| 351 | number of A-C SNPs in 10kb flanking                                      | 1108 | frequency of CAAAC in 5 kb flanking | 1865 | frequency of TTTCG in 5 kb flanking                          |
| 352 | number of A-G SNPs in 10kb flanking                                      | 1109 | frequency of CAAAG in 5 kb flanking | 1866 | frequency of TTTCT in 5 kb flanking                          |
| 353 | number of A-T SNPs in 10kb flanking                                      | 1110 | frequency of CAAAT in 5 kb flanking | 1867 | frequency of TTTGA in 5 kb flanking                          |
| 354 | number of C-G SNPs in 10kb flanking                                      | 1111 | frequency of CAACA in 5 kb flanking | 1868 | frequency of TTTGC in 5 kb flanking                          |
| 355 | number of C-T SNPs in 10kb flanking                                      | 1112 | frequency of CAACC in 5 kb flanking | 1869 | frequency of TTTGG in 5 kb flanking                          |
| 356 | number of G-T SNPs in 10kb flanking                                      | 1113 | frequency of CAACG in 5 kb flanking | 1870 | frequency of TTTGT in 5 kb flanking                          |
| 357 | number of total SNPs in 10kb flanking                                    | 1114 | frequency of CAACT in 5 kb flanking | 1871 | frequency of TTTTA in 5 kb flanking                          |
| 358 | number of transitions in 10kb flanking                                   | 1115 | frequency of CAAGA in 5 kb flanking | 1872 | frequency of TTTTC in 5 kb flanking                          |
| 359 | number of transversions in 10kb flanking                                 | 1116 | frequency of CAAGC in 5 kb flanking | 1873 | frequency of TTTTG in 5 kb flanking                          |
| 360 | proportion of transitions in 10kb flanking relative to total num of SNPs | 1117 | frequency of CAAGG in 5 kb flanking | 1874 | frequency of TTTTT in 5 kb flanking                          |
| 361 | proportion of A-C SNPs in 10kb flanking relative to total num SNPs       | 1118 | frequency of CAAGT in 5 kb flanking | 1875 | # of cpg islands                                             |
| 362 | proportion of A-G SNPs in 10kb flanking relative to total num SNPs       | 1119 | frequency of CAATA in 5 kb flanking | 1876 | # of cpg islands/bp of sequence                              |
| 363 | proportion of A-T SNPs in 10kb flanking relative to total num SNPs       | 1120 | frequency of CAATC in 5 kb flanking | 1877 | % of the sequence composed of cpg islands                    |
| 364 | proportion of C-G SNPs in 10kb flanking relative to total num SNPs       | 1121 | frequency of CAATG in 5 kb flanking | 1878 | number of exons in the gene                                  |
| 365 | proportion of C-T SNPs in 10kb flanking relative to total num SNPs       | 1122 | frequency of CAATT in 5 kb flanking | 1879 | proportion (by bp) of exon content in the ccds               |
| 366 | proportion of G-T SNPs in 10kb flanking relative to total num SNPs       | 1123 | frequency of CACAA in 5 kb flanking | 1880 | proportion of divergent sites per bp in ccds                 |
| 367 | A-C SNPs per bp in 10kb flanking                                         | 1124 | frequency of CACAC in 5 kb flanking | 1881 | number of divergent sites in total in ccds                   |
| 368 | A-G SNPs per bp in 10kb flanking                                         | 1125 | frequency of CACAG in 5 kb flanking | 1882 | proportion of divergent sites per bp, including gaps in ccds |
| 369 | A-T SNPs per bp in 10kb flanking                                         | 1126 | frequency of CACAT in 5 kb flanking | 1883 | number of divergent sites in total, including gaps in ccds   |
| 370 | C-G SNPs per bp in 10kb flanking                                         | 1127 | frequency of CACCA in 5 kb flanking | 1884 | proportion of divergent transitions per bp in ccds           |
| 371 | C-T SNPs per bp in 10kb flanking                                         | 1128 | frequency of CACCC in 5 kb flanking | 1885 | number of divergent transitions in ccds                      |

|     |                                                                                       |      |                                     |      |                                                                                          |
|-----|---------------------------------------------------------------------------------------|------|-------------------------------------|------|------------------------------------------------------------------------------------------|
| 372 | G-T SNPs per bp in 10kb flanking                                                      | 1129 | frequency of CACCG in 5 kb flanking | 1886 | proportion of divergent transversions per bp in ccds                                     |
| 373 | transitions per bp in 10kb flanking                                                   | 1130 | frequency of CACCT in 5 kb flanking | 1887 | number of divergent transversions in ccds                                                |
| 374 | transversions per bp 10kb flanking                                                    | 1131 | frequency of CACGA in 5 kb flanking | 1888 | proportion of divergent sites (no gaps) that are transitions in ccds                     |
| 375 | total snps per bp in 10kb flanking                                                    | 1132 | frequency of CACGC in 5 kb flanking | 1889 | proportion of divergent sites that (no gaps) are transversions in ccds                   |
| 376 | number of A-C SNPs in introns plus 2 kb flanking                                      | 1133 | frequency of CACGG in 5 kb flanking | 1890 | proportion of total divergent sites that are gaps, including gaps in ccds                |
| 377 | number of A-G SNPs in introns plus 2 kb flanking                                      | 1134 | frequency of CACGT in 5 kb flanking | 1891 | proportion of AC divergent sites relative to total num divergent sites (no gaps) in ccds |
| 378 | number of A-T SNPs in introns plus 2 kb flanking                                      | 1135 | frequency of CACTA in 5 kb flanking | 1892 | proportion of AG divergent sites relative to total num divergent sites (no gaps) in ccds |
| 379 | number of C-G SNPs in introns plus 2 kb flanking                                      | 1136 | frequency of CACTC in 5 kb flanking | 1893 | proportion of AT divergent sites relative to total num divergent sites (no gaps) in ccds |
| 380 | number of C-T SNPs in introns plus 2 kb flanking                                      | 1137 | frequency of CACTG in 5 kb flanking | 1894 | proportion of CG divergent sites relative to total num divergent sites (no gaps) in ccds |
| 381 | number of G-T SNPs in introns plus 2 kb flanking                                      | 1138 | frequency of CACTT in 5 kb flanking | 1895 | proportion of CT divergent sites relative to total num divergent sites (no gaps) in ccds |
| 382 | number of total SNPS in introns plus 2 kb flanking                                    | 1139 | frequency of CAGAA in 5 kb flanking | 1896 | proportion of GT divergent sites relative to total num divergent sites (no gaps) in ccds |
| 383 | number of transitions in introns plus 2 kb flanking                                   | 1140 | frequency of CAGAC in 5 kb flanking | 1897 | AC divergent sites per bp in ccds                                                        |
| 384 | number of transversions in introns plus 2 kb flanking                                 | 1141 | frequency of CAGAG in 5 kb flanking | 1898 | AG divergent sites per bp in ccds                                                        |
| 385 | proportion of transitions in introns plus 2 kb flanking relative to total num of SNPs | 1142 | frequency of CAGAT in 5 kb flanking | 1899 | AT divergent sites per bp in ccds                                                        |
| 386 | proportion of A-C SNPs in introns plus 2 kb flanking relative to total num SNPs       | 1143 | frequency of CAGCA in 5 kb flanking | 1900 | CG divergent sites per bp in ccds                                                        |
| 387 | proportion of A-G SNPs in introns plus 2 kb flanking relative to total num SNPs       | 1144 | frequency of CAGCC in 5 kb flanking | 1901 | CT divergent sites per bp in ccds                                                        |
| 388 | proportion of A-T SNPs in introns plus 2 kb flanking relative to total num SNPs       | 1145 | frequency of CAGCG in 5 kb flanking | 1902 | GT divergent sites per bp in ccds                                                        |
| 389 | proportion of C-G SNPs in introns plus 2 kb flanking relative to total num SNPs       | 1146 | frequency of CAGCT in 5 kb flanking | 1903 | proportion unalignable (gaps in human or other species) per bp in ccds                   |
| 390 | proportion of C-T SNPs in introns plus 2 kb flanking relative to total num SNPs       | 1147 | frequency of CAGGA in 5 kb flanking | 1904 | proportion unalignable (gaps in human) per bp in ccds                                    |
| 391 | proportion of G-T SNPs in introns plus 2 kb flanking relative to total num SNPs       | 1148 | frequency of CAGGC in 5 kb flanking | 1905 | proportion unalignable (gaps in other species) per bp in ccds                            |
| 392 | A-C SNPs per bp in introns plus 2 kb flanking                                         | 1149 | frequency of CAGGG in 5 kb flanking | 1906 | proportion of divergent sites per bp in exons                                            |
| 393 | A-G SNPs per bp in introns plus 2 kb flanking                                         | 1150 | frequency of CAGGT in 5 kb flanking | 1907 | number of divergent sites in total in exons                                              |
| 394 | A-T SNPs per bp in introns plus 2 kb flanking                                         | 1151 | frequency of CAGTA in 5 kb flanking | 1908 | proportion of divergent sites per bp, including gaps in exons                            |
| 395 | C-G SNPs per bp in introns plus 2 kb flanking                                         | 1152 | frequency of CAGTC in 5 kb flanking | 1909 | number of divergent sites in total, including gaps in exons                              |
| 396 | C-T SNPs per bp in introns plus 2 kb flanking                                         | 1153 | frequency of CAGTG in 5 kb flanking | 1910 | proportion of divergent transitions per bp in exons                                      |



|     |                                                                                       |      |                                      |      |                                                                                           |
|-----|---------------------------------------------------------------------------------------|------|--------------------------------------|------|-------------------------------------------------------------------------------------------|
| 397 | G-T SNPs per bp in introns plus 2 kb flanking                                         | 1154 | frequency of CAGTT in 5 kb flanking  | 1911 | number of divergent transitions in exons                                                  |
| 398 | transitions per bp in introns plus 2 kb flanking                                      | 1155 | frequency of CATAA in 5 kb flanking  | 1912 | proportion of divergent transversions per bp in exons                                     |
| 399 | transversions per bp introns plus 2 kb flanking                                       | 1156 | frequency of CATAAC in 5 kb flanking | 1913 | number of divergent transversions in exons                                                |
| 400 | total snps per bp in introns plus 2 kb flanking                                       | 1157 | frequency of CATAG in 5 kb flanking  | 1914 | proportion of divergent sites (no gaps) that are transitions in exons                     |
| 401 | number of A-C SNPs in introns plus 5 kb flanking                                      | 1158 | frequency of CATAT in 5 kb flanking  | 1915 | proportion of divergent sites that (no gaps) are transversions in exons                   |
| 402 | number of A-G SNPs in introns plus 5 kb flanking                                      | 1159 | frequency of CATCA in 5 kb flanking  | 1916 | proportion of total divergent sites that are gaps, including gaps in exons                |
| 403 | number of A-T SNPs in introns plus 5 kb flanking                                      | 1160 | frequency of CATCC in 5 kb flanking  | 1917 | proportion of AC divergent sites relative to total num divergent sites (no gaps) in exons |
| 404 | number of C-G SNPs in introns plus 5 kb flanking                                      | 1161 | frequency of CATCG in 5 kb flanking  | 1918 | proportion of AG divergent sites relative to total num divergent sites (no gaps) in exons |
| 405 | number of C-T SNPs in introns plus 5 kb flanking                                      | 1162 | frequency of CATCT in 5 kb flanking  | 1919 | proportion of AT divergent sites relative to total num divergent sites (no gaps) in exons |
| 406 | number of G-T SNPs in introns plus 5 kb flanking                                      | 1163 | frequency of CATGA in 5 kb flanking  | 1920 | proportion of CG divergent sites relative to total num divergent sites (no gaps) in exons |
| 407 | number of total SNPS in introns plus 5 kb flanking                                    | 1164 | frequency of CATGC in 5 kb flanking  | 1921 | proportion of CT divergent sites relative to total num divergent sites (no gaps) in exons |
| 408 | number of transitions in introns plus 5 kb flanking                                   | 1165 | frequency of CATGG in 5 kb flanking  | 1922 | proportion of GT divergent sites relative to total num divergent sites (no gaps) in exons |
| 409 | number of transversions in introns plus 5 kb flanking                                 | 1166 | frequency of CATGT in 5 kb flanking  | 1923 | AC divergent sites per bp in exons                                                        |
| 410 | proportion of transitions in introns plus 5 kb flanking relative to total num of SNPs | 1167 | frequency of CATAA in 5 kb flanking  | 1924 | AG divergent sites per bp in exons                                                        |
| 411 | proportion of A-C SNPs in introns plus 5 kb flanking relative to total num SNPs       | 1168 | frequency of CATTC in 5 kb flanking  | 1925 | AT divergent sites per bp in exons                                                        |
| 412 | proportion of A-G SNPs in introns plus 5 kb flanking relative to total num SNPs       | 1169 | frequency of CATTG in 5 kb flanking  | 1926 | CG divergent sites per bp in exons                                                        |
| 413 | proportion of A-T SNPs in introns plus 5 kb flanking relative to total num SNPs       | 1170 | frequency of CATTT in 5 kb flanking  | 1927 | CT divergent sites per bp in exons                                                        |
| 414 | proportion of C-G SNPs in introns plus 5 kb flanking relative to total num SNPs       | 1171 | frequency of CCAAA in 5 kb flanking  | 1928 | GT divergent sites per bp in exons                                                        |
| 415 | proportion of C-T SNPs in introns plus 5 kb flanking relative to total num SNPs       | 1172 | frequency of CCAAC in 5 kb flanking  | 1929 | proportion unalignable (gaps in human or other species) per bp in exons                   |
| 416 | proportion of G-T SNPs in introns plus 5 kb flanking relative to total num SNPs       | 1173 | frequency of CCAAG in 5 kb flanking  | 1930 | proportion unalignable (gaps in human) per bp in exons                                    |
| 417 | A-C SNPs per bp in introns plus 5 kb flanking                                         | 1174 | frequency of CCAAT in 5 kb flanking  | 1931 | proportion unalignable (gaps in other species) per bp in exons                            |
| 418 | A-G SNPs per bp in introns plus 5 kb flanking                                         | 1175 | frequency of CCACA in 5 kb flanking  | 1932 | proportion of divergent sites per bp in introns                                           |
| 419 | A-T SNPs per bp in introns plus 5 kb flanking                                         | 1176 | frequency of CCACC in 5 kb flanking  | 1933 | number of divergent sites in total in introns                                             |
| 420 | C-G SNPs per bp in introns plus 5 kb flanking                                         | 1177 | frequency of CCACG in 5 kb flanking  | 1934 | proportion of divergent sites per bp, including gaps in introns                           |
| 421 | C-T SNPs per bp in introns plus 5 kb flanking                                         | 1178 | frequency of CCACT in 5 kb flanking  | 1935 | number of divergent sites in total, including gaps in introns                             |

|     |                                                                 |      |                                     |      |                                                                                             |
|-----|-----------------------------------------------------------------|------|-------------------------------------|------|---------------------------------------------------------------------------------------------|
| 422 | G-T SNPs per bp in introns plus 5 kb flanking                   | 1179 | frequency of CCAGA in 5 kb flanking | 1936 | proportion of divergent transitions per bp in introns                                       |
| 423 | transitions per bp in introns plus 5 kb flanking                | 1180 | frequency of CCAGC in 5 kb flanking | 1937 | number of divergent transitions in introns                                                  |
| 424 | transversions per bp introns plus 5 kb flanking                 | 1181 | frequency of CCAGG in 5 kb flanking | 1938 | proportion of divergent transversions per bp in introns                                     |
| 425 | total snps per bp in introns plus 5 kb flanking                 | 1182 | frequency of CCAGT in 5 kb flanking | 1939 | number of divergent transversions in introns                                                |
| 426 | number of synonymous snps                                       | 1183 | frequency of CCATA in 5 kb flanking | 1940 | proportion of divergent sites (no gaps) that are transitions in introns                     |
| 427 | number of nonsynonymous snps                                    | 1184 | frequency of CCATC in 5 kb flanking | 1941 | proportion of divergent sites that (no gaps) are transversions in introns                   |
| 428 | proportion of coding snps that are nonsynonymous ('dn/ds' like) | 1185 | frequency of CCATG in 5 kb flanking | 1942 | proportion of total divergent sites that are gaps, including gaps in introns                |
| 429 | proportion of coding bp that are synonymous snps                | 1186 | frequency of CCATT in 5 kb flanking | 1943 | proportion of AC divergent sites relative to total num divergent sites (no gaps) in introns |
| 430 | proportion of coding bp that are nonsynonymous snps             | 1187 | frequency of CCCAA in 5 kb flanking | 1944 | proportion of AG divergent sites relative to total num divergent sites (no gaps) in introns |
| 431 | GC content in ccds                                              | 1188 | frequency of CCCAC in 5 kb flanking | 1945 | proportion of AT divergent sites relative to total num divergent sites (no gaps) in introns |
| 432 | total % bases masked in ccds                                    | 1189 | frequency of CCCAG in 5 kb flanking | 1946 | proportion of CG divergent sites relative to total num divergent sites (no gaps) in introns |
| 433 | number SINEs in ccds                                            | 1190 | frequency of CCCAT in 5 kb flanking | 1947 | proportion of CT divergent sites relative to total num divergent sites (no gaps) in introns |
| 434 | percentage SINEs in ccds                                        | 1191 | frequency of CCCCA in 5 kb flanking | 1948 | proportion of GT divergent sites relative to total num divergent sites (no gaps) in introns |
| 435 | number ALUs in ccds                                             | 1192 | frequency of CCCCC in 5 kb flanking | 1949 | AC divergent sites per bp in introns                                                        |
| 436 | percentage ALUs in ccds                                         | 1193 | frequency of CCCCG in 5 kb flanking | 1950 | AG divergent sites per bp in introns                                                        |
| 437 | number MIRs in ccds                                             | 1194 | frequency of CCCCT in 5 kb flanking | 1951 | AT divergent sites per bp in introns                                                        |
| 438 | percentage MIRs in ccds                                         | 1195 | frequency of CCCGA in 5 kb flanking | 1952 | CG divergent sites per bp in introns                                                        |
| 439 | number LINES in ccds                                            | 1196 | frequency of CCCGC in 5 kb flanking | 1953 | CT divergent sites per bp in introns                                                        |
| 440 | percentage LINES in ccds                                        | 1197 | frequency of CCCGG in 5 kb flanking | 1954 | GT divergent sites per bp in introns                                                        |
| 441 | number LINE1 in ccds                                            | 1198 | frequency of CCCGT in 5 kb flanking | 1955 | proportion unalignable (gaps in human or other species) per bp in introns                   |
| 442 | percentage LINE1 in ccds                                        | 1199 | frequency of CCCTA in 5 kb flanking | 1956 | proportion unalignable (gaps in human) per bp in introns                                    |
| 443 | number LINE2 in ccds                                            | 1200 | frequency of CCCTC in 5 kb flanking | 1957 | proportion unalignable (gaps in other species) per bp in introns                            |
| 444 | percentage LINE2 in ccds                                        | 1201 | frequency of CCCTG in 5 kb flanking | 1958 | proportion of divergent sites per bp in 2 kb up                                             |
| 445 | number L3/CR1 in ccds                                           | 1202 | frequency of CCCTT in 5 kb flanking | 1959 | number of divergent sites in total in 2 kb up                                               |
| 446 | percentage L3/CR1 in ccds                                       | 1203 | frequency of CCGAA in 5 kb flanking | 1960 | proportion of divergent sites per bp, including gaps in 2 kb up                             |
| 447 | number LTR in ccds                                              | 1204 | frequency of CCGAC in 5 kb flanking | 1961 | number of divergent sites in total, including gaps in 2 kb up                               |
| 448 | percentage LTR in ccds                                          | 1205 | frequency of CCGAG in 5 kb flanking | 1962 | proportion of divergent transitions per bp in 2 kb up                                       |
| 449 | number MaLRs in ccds                                            | 1206 | frequency of CCGAT in 5 kb flanking | 1963 | number of divergent transitions in 2 kb up                                                  |

|     |                                                                   |      |                                     |      |                                                                                             |
|-----|-------------------------------------------------------------------|------|-------------------------------------|------|---------------------------------------------------------------------------------------------|
| 450 | percentage MaLRs in ccds                                          | 1207 | frequency of CCGCA in 5 kb flanking | 1964 | proportion of divergent transversions per bp in 2 kb up                                     |
| 451 | number ERVL in ccds                                               | 1208 | frequency of CCGCC in 5 kb flanking | 1965 | number of divergent transversions in 2 kb up                                                |
| 452 | percentage ERVL in ccds                                           | 1209 | frequency of CCGCG in 5 kb flanking | 1966 | proportion of divergent sites (no gaps) that are transitions in 2 kb up                     |
| 453 | number ERV_classI in ccds                                         | 1210 | frequency of CCGCT in 5 kb flanking | 1967 | proportion of divergent sites that (no gaps) are transversions in 2 kb up                   |
| 454 | percentage ERV_classI in ccds                                     | 1211 | frequency of CCGGA in 5 kb flanking | 1968 | proportion of total divergent sites that are gaps, including gaps in 2 kb up                |
| 455 | number ERV_classII in ccds                                        | 1212 | frequency of CCGGC in 5 kb flanking | 1969 | proportion of AC divergent sites relative to total num divergent sites (no gaps) in 2 kb up |
| 456 | percentage ERV_classII in ccds                                    | 1213 | frequency of CCGGG in 5 kb flanking | 1970 | proportion of AG divergent sites relative to total num divergent sites (no gaps) in 2 kb up |
| 457 | number DNA elements in ccds                                       | 1214 | frequency of CCGGT in 5 kb flanking | 1971 | proportion of AT divergent sites relative to total num divergent sites (no gaps) in 2 kb up |
| 458 | percentage DNA elements in ccds                                   | 1215 | frequency of CCGTA in 5 kb flanking | 1972 | proportion of CG divergent sites relative to total num divergent sites (no gaps) in 2 kb up |
| 459 | number MER1_type in ccds                                          | 1216 | frequency of CCGTC in 5 kb flanking | 1973 | proportion of CT divergent sites relative to total num divergent sites (no gaps) in 2 kb up |
| 460 | percentage MER1_type in ccds                                      | 1217 | frequency of CCGTG in 5 kb flanking | 1974 | proportion of GT divergent sites relative to total num divergent sites (no gaps) in 2 kb up |
| 461 | number MER2_type in ccds                                          | 1218 | frequency of CCGTT in 5 kb flanking | 1975 | AC divergent sites per bp in 2 kb up                                                        |
| 462 | percentage MER2_type in ccds                                      | 1219 | frequency of CCTAA in 5 kb flanking | 1976 | AG divergent sites per bp in 2 kb up                                                        |
| 463 | number unclassified in ccds                                       | 1220 | frequency of CCTAC in 5 kb flanking | 1977 | AT divergent sites per bp in 2 kb up                                                        |
| 464 | percentage unclassified in ccds                                   | 1221 | frequency of CCTAG in 5 kb flanking | 1978 | CG divergent sites per bp in 2 kb up                                                        |
| 465 | number small RNA in ccds                                          | 1222 | frequency of CCTAT in 5 kb flanking | 1979 | CT divergent sites per bp in 2 kb up                                                        |
| 466 | percentage small RNA in ccds                                      | 1223 | frequency of CCTCA in 5 kb flanking | 1980 | GT divergent sites per bp in 2 kb up                                                        |
| 467 | number satellites in ccds                                         | 1224 | frequency of CCTCC in 5 kb flanking | 1981 | proportion unalignable (gaps in human or other species) per bp in 2 kb up                   |
| 468 | percentage satellites in ccds                                     | 1225 | frequency of CCTCG in 5 kb flanking | 1982 | proportion unalignable (gaps in human) per bp in 2 kb up                                    |
| 469 | number simple repeats in ccds                                     | 1226 | frequency of CCTCT in 5 kb flanking | 1983 | proportion unalignable (gaps in other species) per bp in 2 kb up                            |
| 470 | percentage simple repeats in ccds                                 | 1227 | frequency of CCTGA in 5 kb flanking | 1984 | proportion of divergent sites per bp in 2 kb down                                           |
| 471 | number low complexity in ccds                                     | 1228 | frequency of CCTGC in 5 kb flanking | 1985 | number of divergent sites in total in 2 kb down                                             |
| 472 | percentage low complexity in ccds                                 | 1229 | frequency of CCTGG in 5 kb flanking | 1986 | proportion of divergent sites per bp, including gaps in 2 kb down                           |
| 473 | total repeats (number SINES + LINES + LTR + DNA elements) in ccds | 1230 | frequency of CCTGT in 5 kb flanking | 1987 | number of divergent sites in total, including gaps in 2 kb down                             |
| 474 | GC content in 2kb upstream                                        | 1231 | frequency of CCTTA in 5 kb flanking | 1988 | proportion of divergent transitions per bp in 2 kb down                                     |
| 475 | total % bases masked in 2kb upstream                              | 1232 | frequency of CCTTC in 5 kb flanking | 1989 | number of divergent transitions in 2 kb down                                                |
| 476 | number SINES in 2kb upstream                                      | 1233 | frequency of CCTTG in 5 kb flanking | 1990 | proportion of divergent transversions per bp in 2 kb down                                   |
| 477 | percentage SINES in 2kb upstream                                  | 1234 | frequency of CCTTT in 5 kb flanking | 1991 | number of divergent transversions in 2 kb down                                              |

|     |                                         |      |                                     |      |                                                                                               |
|-----|-----------------------------------------|------|-------------------------------------|------|-----------------------------------------------------------------------------------------------|
| 478 | number ALUs in 2kb upstream             | 1235 | frequency of CGAAA in 5 kb flanking | 1992 | proportion of divergent sites (no gaps) that are transitions in 2 kb down                     |
| 479 | percentage ALUs in 2kb upstream         | 1236 | frequency of CGAAC in 5 kb flanking | 1993 | proportion of divergent sites that (no gaps) are transversions in 2 kb down                   |
| 480 | number MIRs in 2kb upstream             | 1237 | frequency of CGAAG in 5 kb flanking | 1994 | proportion of total divergent sites that are gaps, including gaps in 2 kb down                |
| 481 | percentage MIRs in 2kb upstream         | 1238 | frequency of CGAAT in 5 kb flanking | 1995 | proportion of AC divergent sites relative to total num divergent sites (no gaps) in 2 kb down |
| 482 | number LINEs in 2kb upstream            | 1239 | frequency of CGACA in 5 kb flanking | 1996 | proportion of AG divergent sites relative to total num divergent sites (no gaps) in 2 kb down |
| 483 | percentage LINEs in 2kb upstream        | 1240 | frequency of CGACC in 5 kb flanking | 1997 | proportion of AT divergent sites relative to total num divergent sites (no gaps) in 2 kb down |
| 484 | number LINE1 in 2kb upstream            | 1241 | frequency of CGACG in 5 kb flanking | 1998 | proportion of CG divergent sites relative to total num divergent sites (no gaps) in 2 kb down |
| 485 | percentage LINE1 in 2kb upstream        | 1242 | frequency of CGACT in 5 kb flanking | 1999 | proportion of CT divergent sites relative to total num divergent sites (no gaps) in 2 kb down |
| 486 | number LINE2 in 2kb upstream            | 1243 | frequency of CGAGA in 5 kb flanking | 2000 | proportion of GT divergent sites relative to total num divergent sites (no gaps) in 2 kb down |
| 487 | percentage LINE2 in 2kb upstream        | 1244 | frequency of CGAGC in 5 kb flanking | 2001 | AC divergent sites per bp in 2 kb down                                                        |
| 488 | number L3/CR1 in 2kb upstream           | 1245 | frequency of CGAGG in 5 kb flanking | 2002 | AG divergent sites per bp in 2 kb down                                                        |
| 489 | percentage L3/CR1 in 2kb upstream       | 1246 | frequency of CGAGT in 5 kb flanking | 2003 | AT divergent sites per bp in 2 kb down                                                        |
| 490 | number LTR in 2kb upstream              | 1247 | frequency of CGATA in 5 kb flanking | 2004 | CG divergent sites per bp in 2 kb down                                                        |
| 491 | percentage LTR in 2kb upstream          | 1248 | frequency of CGATC in 5 kb flanking | 2005 | CT divergent sites per bp in 2 kb down                                                        |
| 492 | number MaLRs in 2kb upstream            | 1249 | frequency of CGATG in 5 kb flanking | 2006 | GT divergent sites per bp in 2 kb down                                                        |
| 493 | percentage MaLRs in 2kb upstream        | 1250 | frequency of CGATT in 5 kb flanking | 2007 | proportion unalignable (gaps in human or other species) per bp in 2 kb down                   |
| 494 | number ERVL in 2kb upstream             | 1251 | frequency of CGCAA in 5 kb flanking | 2008 | proportion unalignable (gaps in human) per bp in 2 kb down                                    |
| 495 | percentage ERVL in 2kb upstream         | 1252 | frequency of CGCAC in 5 kb flanking | 2009 | proportion unalignable (gaps in other species) per bp in 2 kb down                            |
| 496 | number ERV_classII in 2kb upstream      | 1253 | frequency of CGCAG in 5 kb flanking | 2010 | proportion of divergent sites per bp in 5 kb up                                               |
| 497 | percentage ERV_classII in 2kb upstream  | 1254 | frequency of CGCAT in 5 kb flanking | 2011 | number of divergent sites in total in 5 kb up                                                 |
| 498 | number MER1_type in 2kb upstream        | 1255 | frequency of CGCCA in 5 kb flanking | 2012 | proportion of divergent sites per bp, including gaps in 5 kb up                               |
| 499 | percentage MER1_type in 2kb upstream    | 1256 | frequency of CGCCC in 5 kb flanking | 2013 | number of divergent sites in total, including gaps in 5 kb up                                 |
| 500 | number MER2_type in 2kb upstream        | 1257 | frequency of CGCCG in 5 kb flanking | 2014 | proportion of divergent transitions per bp in 5 kb up                                         |
| 501 | percentage MER2_type in 2kb upstream    | 1258 | frequency of CGCCT in 5 kb flanking | 2015 | number of divergent transitions in 5 kb up                                                    |
| 502 | number unclassified in 2kb upstream     | 1259 | frequency of CGCGA in 5 kb flanking | 2016 | proportion of divergent transversions per bp in 5 kb up                                       |
| 503 | percentage unclassified in 2kb upstream | 1260 | frequency of CGCGC in 5 kb flanking | 2017 | number of divergent transversions in 5 kb up                                                  |
| 504 | number small RNA in 2kb upstream        | 1261 | frequency of CGCGG in 5 kb flanking | 2018 | proportion of divergent sites (no gaps) that are transitions in 5 kb up                       |
| 505 | percentage small RNA in 2kb upstream    | 1262 | frequency of CGCGT in 5 kb flanking | 2019 | proportion of divergent sites that (no gaps) are transversions in 5 kb up                     |

|     |                                                                           |      |                                     |      |                                                                                             |
|-----|---------------------------------------------------------------------------|------|-------------------------------------|------|---------------------------------------------------------------------------------------------|
| 506 | number satellites in 2kb upstream                                         | 1263 | frequency of CGCTA in 5 kb flanking | 2020 | proportion of total divergent sites that are gaps, including gaps in 5 kb up                |
| 507 | percentage satellites in 2kb upstream                                     | 1264 | frequency of CGCTC in 5 kb flanking | 2021 | proportion of AC divergent sites relative to total num divergent sites (no gaps) in 5 kb up |
| 508 | number simple repeats in 2kb upstream                                     | 1265 | frequency of CGCTG in 5 kb flanking | 2022 | proportion of AG divergent sites relative to total num divergent sites (no gaps) in 5 kb up |
| 509 | percentage simple repeats in 2kb upstream                                 | 1266 | frequency of CGCTT in 5 kb flanking | 2023 | proportion of AT divergent sites relative to total num divergent sites (no gaps) in 5 kb up |
| 510 | number low complexity in 2kb upstream                                     | 1267 | frequency of CGGAA in 5 kb flanking | 2024 | proportion of CG divergent sites relative to total num divergent sites (no gaps) in 5 kb up |
| 511 | percentage low complexity in 2kb upstream                                 | 1268 | frequency of CGGAC in 5 kb flanking | 2025 | proportion of CT divergent sites relative to total num divergent sites (no gaps) in 5 kb up |
| 512 | total repeats (number SINEs + LINEs + LTR + DNA elements) in 2kb upstream | 1269 | frequency of CGGAG in 5 kb flanking | 2026 | proportion of GT divergent sites relative to total num divergent sites (no gaps) in 5 kb up |
| 513 | GC content in 2 kb downstream                                             | 1270 | frequency of CGGAT in 5 kb flanking | 2027 | AC divergent sites per bp in 5 kb up                                                        |
| 514 | total % bases masked in 2 kb downstream                                   | 1271 | frequency of CGGCA in 5 kb flanking | 2028 | AG divergent sites per bp in 5 kb up                                                        |
| 515 | number SINEs in 2 kb downstream                                           | 1272 | frequency of CGGCC in 5 kb flanking | 2029 | AT divergent sites per bp in 5 kb up                                                        |
| 516 | percentage SINEs in 2 kb downstream                                       | 1273 | frequency of CGGCG in 5 kb flanking | 2030 | CG divergent sites per bp in 5 kb up                                                        |
| 517 | number ALUs in 2 kb downstream                                            | 1274 | frequency of CGGCT in 5 kb flanking | 2031 | CT divergent sites per bp in 5 kb up                                                        |
| 518 | percentage ALUs in 2 kb downstream                                        | 1275 | frequency of CGGGA in 5 kb flanking | 2032 | GT divergent sites per bp in 5 kb up                                                        |
| 519 | number MIRs in 2 kb downstream                                            | 1276 | frequency of CGGGC in 5 kb flanking | 2033 | proportion unalignable (gaps in human or other species) per bp in 5 kb up                   |
| 520 | percentage MIRs in 2 kb downstream                                        | 1277 | frequency of CGGGG in 5 kb flanking | 2034 | proportion unalignable (gaps in human) per bp in 5 kb up                                    |
| 521 | number LINEs in 2 kb downstream                                           | 1278 | frequency of CGGGT in 5 kb flanking | 2035 | proportion unalignable (gaps in other species) per bp in 5 kb up                            |
| 522 | percentage LINEs in 2 kb downstream                                       | 1279 | frequency of CGGTA in 5 kb flanking | 2036 | proportion of divergent sites per bp in 5 kb down                                           |
| 523 | number LINE1 in 2 kb downstream                                           | 1280 | frequency of CGGTC in 5 kb flanking | 2037 | number of divergent sites in total in 5 kb down                                             |
| 524 | percentage LINE1 in 2 kb downstream                                       | 1281 | frequency of CGGTG in 5 kb flanking | 2038 | proportion of divergent sites per bp, including gaps in 5 kb down                           |
| 525 | number LINE2 in 2 kb downstream                                           | 1282 | frequency of CGGTT in 5 kb flanking | 2039 | number of divergent sites in total, including gaps in 5 kb down                             |
| 526 | percentage LINE2 in 2 kb downstream                                       | 1283 | frequency of CGTAA in 5 kb flanking | 2040 | proportion of divergent transitions per bp in 5 kb down                                     |
| 527 | number L3/CR1 in 2 kb downstream                                          | 1284 | frequency of CGTAC in 5 kb flanking | 2041 | number of divergent transitions in 5 kb down                                                |
| 528 | percentage L3/CR1 in 2 kb downstream                                      | 1285 | frequency of CGTAG in 5 kb flanking | 2042 | proportion of divergent transversions per bp in 5 kb down                                   |
| 529 | number LTR in 2 kb downstream                                             | 1286 | frequency of CGTAT in 5 kb flanking | 2043 | number of divergent transversions in 5 kb down                                              |
| 530 | percentage LTR in 2 kb downstream                                         | 1287 | frequency of CGTCA in 5 kb flanking | 2044 | proportion of divergent sites (no gaps) that are transitions in 5 kb down                   |
| 531 | number MaLRs in 2 kb downstream                                           | 1288 | frequency of CGTCC in 5 kb flanking | 2045 | proportion of divergent sites that (no gaps) are transversions in 5 kb down                 |
| 532 | percentage MaLRs in 2 kb downstream                                       | 1289 | frequency of CGTCG in 5 kb flanking | 2046 | proportion of total divergent sites that are gaps, including gaps in 5 kb down              |

|     |                                                                              |      |                                     |      |                                                                                               |
|-----|------------------------------------------------------------------------------|------|-------------------------------------|------|-----------------------------------------------------------------------------------------------|
| 533 | number ERVL in 2 kb downstream                                               | 1290 | frequency of CGTCT in 5 kb flanking | 2047 | proportion of AC divergent sites relative to total num divergent sites (no gaps) in 5 kb down |
| 534 | percentage ERVL in 2 kb downstream                                           | 1291 | frequency of CGTGA in 5 kb flanking | 2048 | proportion of AG divergent sites relative to total num divergent sites (no gaps) in 5 kb down |
| 535 | number ERV_classI in 2 kb downstream                                         | 1292 | frequency of CGTGC in 5 kb flanking | 2049 | proportion of AT divergent sites relative to total num divergent sites (no gaps) in 5 kb down |
| 536 | percentage ERV_classI in 2 kb downstream                                     | 1293 | frequency of CGTGG in 5 kb flanking | 2050 | proportion of CG divergent sites relative to total num divergent sites (no gaps) in 5 kb down |
| 537 | number ERV_classII in 2 kb downstream                                        | 1294 | frequency of CGTGT in 5 kb flanking | 2051 | proportion of CT divergent sites relative to total num divergent sites (no gaps) in 5 kb down |
| 538 | percentage ERV_classII in 2 kb downstream                                    | 1295 | frequency of CGTTA in 5 kb flanking | 2052 | proportion of GT divergent sites relative to total num divergent sites (no gaps) in 5 kb down |
| 539 | number MER1_type in 2 kb downstream                                          | 1296 | frequency of CGTTC in 5 kb flanking | 2053 | AC divergent sites per bp in 5 kb down                                                        |
| 540 | percentage MER1_type in 2 kb downstream                                      | 1297 | frequency of CGTTG in 5 kb flanking | 2054 | AG divergent sites per bp in 5 kb down                                                        |
| 541 | number MER2_type in 2 kb downstream                                          | 1298 | frequency of CGTTT in 5 kb flanking | 2055 | AT divergent sites per bp in 5 kb down                                                        |
| 542 | percentage MER2_type in 2 kb downstream                                      | 1299 | frequency of CTAAC in 5 kb flanking | 2056 | CG divergent sites per bp in 5 kb down                                                        |
| 543 | number unclassified in 2 kb downstream                                       | 1300 | frequency of CTAAC in 5 kb flanking | 2057 | CT divergent sites per bp in 5 kb down                                                        |
| 544 | percentage unclassified in 2 kb downstream                                   | 1301 | frequency of CTAAG in 5 kb flanking | 2058 | GT divergent sites per bp in 5 kb down                                                        |
| 545 | number small RNA in 2 kb downstream                                          | 1302 | frequency of CTAAT in 5 kb flanking | 2059 | proportion unalignable (gaps in human or other species) per bp in 5 kb down                   |
| 546 | percentage small RNA in 2 kb downstream                                      | 1303 | frequency of CTACA in 5 kb flanking | 2060 | proportion unalignable (gaps in human) per bp in 5 kb down                                    |
| 547 | number satellites in 2 kb downstream                                         | 1304 | frequency of CTACC in 5 kb flanking | 2061 | proportion unalignable (gaps in other species) per bp in 5 kb down                            |
| 548 | percentage satellites in 2 kb downstream                                     | 1305 | frequency of CTACG in 5 kb flanking | 2062 | proportion of divergent sites per bp in 10 kb up                                              |
| 549 | number simple repeats in 2 kb downstream                                     | 1306 | frequency of CTAAT in 5 kb flanking | 2063 | number of divergent sites in total in 10 kb up                                                |
| 550 | percentage simple repeats in 2 kb downstream                                 | 1307 | frequency of CTAGA in 5 kb flanking | 2064 | proportion of divergent sites per bp, including gaps in 10 kb up                              |
| 551 | number low complexity in 2 kb downstream                                     | 1308 | frequency of CTAGC in 5 kb flanking | 2065 | number of divergent sites in total, including gaps in 10 kb up                                |
| 552 | percentage low complexity in 2 kb downstream                                 | 1309 | frequency of CTAGG in 5 kb flanking | 2066 | proportion of divergent transitions per bp in 10 kb up                                        |
| 553 | total repeats (number SINES + LINES + LTR + DNA elements) in 2 kb downstream | 1310 | frequency of CTAGT in 5 kb flanking | 2067 | number of divergent transitions in 10 kb up                                                   |
| 554 | GC content in 5 kb upstream                                                  | 1311 | frequency of CTATA in 5 kb flanking | 2068 | proportion of divergent transversions per bp in 10 kb up                                      |
| 555 | total % bases masked in 5 kb upstream                                        | 1312 | frequency of CTATC in 5 kb flanking | 2069 | number of divergent transversions in 10 kb up                                                 |
| 556 | number SINES in 5 kb upstream                                                | 1313 | frequency of CTATG in 5 kb flanking | 2070 | proportion of divergent sites (no gaps) that are transitions in 10 kb up                      |
| 557 | percentage SINES in 5 kb upstream                                            | 1314 | frequency of CTATT in 5 kb flanking | 2071 | proportion of divergent sites that (no gaps) are transversions in 10 kb up                    |
| 558 | number ALUs in 5 kb upstream                                                 | 1315 | frequency of CTCAA in 5 kb flanking | 2072 | proportion of total divergent sites that are gaps, including gaps in 10 kb up                 |

|     |                                          |      |                                     |      |                                                                                                |
|-----|------------------------------------------|------|-------------------------------------|------|------------------------------------------------------------------------------------------------|
| 559 | percentage ALUs in 5 kb upstream         | 1316 | frequency of CTCAC in 5 kb flanking | 2073 | proportion of AC divergent sites relative to total num divergent sites (no gaps) in 10 kb up   |
| 560 | number MIRs in 5 kb upstream             | 1317 | frequency of CTCAG in 5 kb flanking | 2074 | proportion of AG divergent sites relative to total num divergent sites (no gaps) in 10 kb up   |
| 561 | percentage MIRs in 5 kb upstream         | 1318 | frequency of CTCAT in 5 kb flanking | 2075 | proportion of AT divergent sites relative to total num divergent sites (no gaps) in 10 kb up   |
| 562 | number LINES in 5 kb upstream            | 1319 | frequency of CTCCA in 5 kb flanking | 2076 | proportion of CG divergent sites relative to total num divergent sites (no gaps) in 10 kb up   |
| 563 | percentage LINES in 5 kb upstream        | 1320 | frequency of CTCCC in 5 kb flanking | 2077 | proportion of CT divergent sites relative to total num divergent sites (no gaps) in 10 kb up   |
| 564 | number LINE1 in 5 kb upstream            | 1321 | frequency of CTCCG in 5 kb flanking | 2078 | proportion of GT divergent sites relative to total num divergent sites (no gaps) in 10 kb up   |
| 565 | percentage LINE1 in 5 kb upstream        | 1322 | frequency of CTCTT in 5 kb flanking | 2079 | AC divergent sites per bp in 10 kb up                                                          |
| 566 | number LINE2 in 5 kb upstream            | 1323 | frequency of CTCGA in 5 kb flanking | 2080 | AG divergent sites per bp in 10 kb up                                                          |
| 567 | percentage LINE2 in 5 kb upstream        | 1324 | frequency of CTCGC in 5 kb flanking | 2081 | AT divergent sites per bp in 10 kb up                                                          |
| 568 | number L3/CR1 in 5 kb upstream           | 1325 | frequency of CTCGG in 5 kb flanking | 2082 | CG divergent sites per bp in 10 kb up                                                          |
| 569 | percentage L3/CR1 in 5 kb upstream       | 1326 | frequency of CTCGT in 5 kb flanking | 2083 | CT divergent sites per bp in 10 kb up                                                          |
| 570 | number LTR in 5 kb upstream              | 1327 | frequency of CTCTA in 5 kb flanking | 2084 | GT divergent sites per bp in 10 kb up                                                          |
| 571 | percentage LTR in 5 kb upstream          | 1328 | frequency of CTCTC in 5 kb flanking | 2085 | proportion unalignable (gaps in human or other species) per bp in 10 kb up                     |
| 572 | number MaLRs in 5 kb upstream            | 1329 | frequency of CTCTG in 5 kb flanking | 2086 | proportion unalignable (gaps in human) per bp in 10 kb up                                      |
| 573 | percentage MaLRs in 5 kb upstream        | 1330 | frequency of CTCTT in 5 kb flanking | 2087 | proportion unalignable (gaps in other species) per bp in 10 kb up                              |
| 574 | number ERVL in 5 kb upstream             | 1331 | frequency of CTGAA in 5 kb flanking | 2088 | proportion of divergent sites per bp in 10 kb down                                             |
| 575 | percentage ERVL in 5 kb upstream         | 1332 | frequency of CTGAC in 5 kb flanking | 2089 | number of divergent sites in total in 10 kb down                                               |
| 576 | number ERV_classI in 5 kb upstream       | 1333 | frequency of CTGAG in 5 kb flanking | 2090 | proportion of divergent sites per bp, including gaps in 10 kb down                             |
| 577 | percentage ERV_classI in 5 kb upstream   | 1334 | frequency of CTGAT in 5 kb flanking | 2091 | number of divergent sites in total, including gaps in 10 kb down                               |
| 578 | number ERV_classII in 5 kb upstream      | 1335 | frequency of CTGCA in 5 kb flanking | 2092 | proportion of divergent transitions per bp in 10 kb down                                       |
| 579 | percentage ERV_classII in 5 kb upstream  | 1336 | frequency of CTGCC in 5 kb flanking | 2093 | number of divergent transitions in 10 kb down                                                  |
| 580 | number DNA elements in 5 kb upstream     | 1337 | frequency of CTGCG in 5 kb flanking | 2094 | proportion of divergent transversions per bp in 10 kb down                                     |
| 581 | percentage DNA elements in 5 kb upstream | 1338 | frequency of CTGCT in 5 kb flanking | 2095 | number of divergent transversions in 10 kb down                                                |
| 582 | number MER1_type in 5 kb upstream        | 1339 | frequency of CTGGA in 5 kb flanking | 2096 | proportion of divergent sites (no gaps) that are transitions in 10 kb down                     |
| 583 | percentage MER1_type in 5 kb upstream    | 1340 | frequency of CTGGC in 5 kb flanking | 2097 | proportion of divergent sites that (no gaps) are transversions in 10 kb down                   |
| 584 | number MER2_type in 5 kb upstream        | 1341 | frequency of CTGGG in 5 kb flanking | 2098 | proportion of total divergent sites that are gaps, including gaps in 10 kb down                |
| 585 | percentage MER2_type in 5 kb upstream    | 1342 | frequency of CTGGT in 5 kb flanking | 2099 | proportion of AC divergent sites relative to total num divergent sites (no gaps) in 10 kb down |

|     |                                                                            |      |                                     |      |                                                                                                      |
|-----|----------------------------------------------------------------------------|------|-------------------------------------|------|------------------------------------------------------------------------------------------------------|
| 586 | number unclassified in 5 kb upstream                                       | 1343 | frequency of CTGTA in 5 kb flanking | 2100 | proportion of AG divergent sites relative to total num divergent sites (no gaps) in 10 kb down       |
| 587 | percentage unclassified in 5 kb upstream                                   | 1344 | frequency of CTGTC in 5 kb flanking | 2101 | proportion of AT divergent sites relative to total num divergent sites (no gaps) in 10 kb down       |
| 588 | number small RNA in 5 kb upstream                                          | 1345 | frequency of CTGTG in 5 kb flanking | 2102 | proportion of CG divergent sites relative to total num divergent sites (no gaps) in 10 kb down       |
| 589 | percentage small RNA in 5 kb upstream                                      | 1346 | frequency of CTGTT in 5 kb flanking | 2103 | proportion of CT divergent sites relative to total num divergent sites (no gaps) in 10 kb down       |
| 590 | number satellites in 5 kb upstream                                         | 1347 | frequency of CTTAA in 5 kb flanking | 2104 | proportion of GT divergent sites relative to total num divergent sites (no gaps) in 10 kb down       |
| 591 | percentage satellites in 5 kb upstream                                     | 1348 | frequency of CTTAC in 5 kb flanking | 2105 | AC divergent sites per bp in 10 kb down                                                              |
| 592 | number simple repeats in 5 kb upstream                                     | 1349 | frequency of CTTAG in 5 kb flanking | 2106 | AG divergent sites per bp in 10 kb down                                                              |
| 593 | percentage simple repeats in 5 kb upstream                                 | 1350 | frequency of CTTAT in 5 kb flanking | 2107 | AT divergent sites per bp in 10 kb down                                                              |
| 594 | number low complexity in 5 kb upstream                                     | 1351 | frequency of CTTCA in 5 kb flanking | 2108 | CG divergent sites per bp in 10 kb down                                                              |
| 595 | percentage low complexity in 5 kb upstream                                 | 1352 | frequency of CTTCC in 5 kb flanking | 2109 | CT divergent sites per bp in 10 kb down                                                              |
| 596 | total repeats (number SINES + LINES + LTR + DNA elements) in 5 kb upstream | 1353 | frequency of CTTCG in 5 kb flanking | 2110 | GT divergent sites per bp in 10 kb down                                                              |
| 597 | GC content in 5 kb downstream                                              | 1354 | frequency of CTTCT in 5 kb flanking | 2111 | proportion unalignable (gaps in human or other species) per bp in 10 kb down                         |
| 598 | total % bases masked in 5 kb downstream                                    | 1355 | frequency of CTTGA in 5 kb flanking | 2112 | proportion unalignable (gaps in human) per bp in 10 kb down                                          |
| 599 | number SINES in 5 kb downstream                                            | 1356 | frequency of CTTGC in 5 kb flanking | 2113 | proportion unalignable (gaps in other species) per bp in 10 kb down                                  |
| 600 | percentage SINES in 5 kb downstream                                        | 1357 | frequency of CTTGG in 5 kb flanking | 2114 | proportion of divergent sites per bp in ccds + 2kb flank                                             |
| 601 | number ALUs in 5 kb downstream                                             | 1358 | frequency of CTTGT in 5 kb flanking | 2115 | number of divergent sites in total in ccds + 2kb flank                                               |
| 602 | percentage ALUs in 5 kb downstream                                         | 1359 | frequency of CTTTA in 5 kb flanking | 2116 | proportion of divergent sites per bp, including gaps in ccds + 2kb flank                             |
| 603 | number MIRs in 5 kb downstream                                             | 1360 | frequency of CTTTC in 5 kb flanking | 2117 | number of divergent sites in total, including gaps in ccds + 2kb flank                               |
| 604 | percentage MIRs in 5 kb downstream                                         | 1361 | frequency of CTTTG in 5 kb flanking | 2118 | proportion of divergent transitions per bp in ccds + 2kb flank                                       |
| 605 | number LINES in 5 kb downstream                                            | 1362 | frequency of CTTTT in 5 kb flanking | 2119 | number of divergent transitions in ccds + 2kb flank                                                  |
| 606 | percentage LINES in 5 kb downstream                                        | 1363 | frequency of GAAAA in 5 kb flanking | 2120 | proportion of divergent transversions per bp in ccds + 2kb flank                                     |
| 607 | number LINE1 in 5 kb downstream                                            | 1364 | frequency of GAAAC in 5 kb flanking | 2121 | number of divergent transversions in ccds + 2kb flank                                                |
| 608 | percentage LINE1 in 5 kb downstream                                        | 1365 | frequency of GAAAG in 5 kb flanking | 2122 | proportion of divergent sites (no gaps) that are transitions in ccds + 2kb flank                     |
| 609 | number LINE2 in 5 kb downstream                                            | 1366 | frequency of GAAAT in 5 kb flanking | 2123 | proportion of divergent sites that (no gaps) are transversions in ccds + 2kb flank                   |
| 610 | percentage LINE2 in 5 kb downstream                                        | 1367 | frequency of GAACA in 5 kb flanking | 2124 | proportion of total divergent sites that are gaps, including gaps in ccds + 2kb flank                |
| 611 | number L3/CR1 in 5 kb downstream                                           | 1368 | frequency of GAACC in 5 kb flanking | 2125 | proportion of AC divergent sites relative to total num divergent sites (no gaps) in ccds + 2kb flank |



|     |                                                                              |      |                                     |      |                                                                                                       |
|-----|------------------------------------------------------------------------------|------|-------------------------------------|------|-------------------------------------------------------------------------------------------------------|
| 612 | percentage L3/CR1 in 5 kb downstream                                         | 1369 | frequency of GAACG in 5 kb flanking | 2126 | proportion of AG divergent sites relative to total num divergent sites (no gaps) in ccds + 2kb flank  |
| 613 | number LTR in 5 kb downstream                                                | 1370 | frequency of GAACT in 5 kb flanking | 2127 | proportion of AT divergent sites relative to total num divergent sites (no gaps) in ccds + 2kb flank  |
| 614 | percentage LTR in 5 kb downstream                                            | 1371 | frequency of GAAGA in 5 kb flanking | 2128 | proportion of CG divergent sites relative to total num divergent sites (no gaps) in ccds + 2kb flank  |
| 615 | number MaLRs in 5 kb downstream                                              | 1372 | frequency of GAAGC in 5 kb flanking | 2129 | proportion of CT divergent sites relative to total num divergent sites (no gaps) in ccds + 2kb flank  |
| 616 | percentage MaLRs in 5 kb downstream                                          | 1373 | frequency of GAAGG in 5 kb flanking | 2130 | proportion of GT divergent sites relative to total num divergent sites (no gaps) in ccds + 2kb flank  |
| 617 | number ERVL in 5 kb downstream                                               | 1374 | frequency of GAAGT in 5 kb flanking | 2131 | AC divergent sites per bp in ccds + 2kb flank                                                         |
| 618 | percentage ERVL in 5 kb downstream                                           | 1375 | frequency of GAATA in 5 kb flanking | 2132 | AG divergent sites per bp in ccds + 2kb flank                                                         |
| 619 | number ERV_classI in 5 kb downstream                                         | 1376 | frequency of GAATC in 5 kb flanking | 2133 | AT divergent sites per bp in ccds + 2kb flank                                                         |
| 620 | percentage ERV_classI in 5 kb downstream                                     | 1377 | frequency of GAATG in 5 kb flanking | 2134 | CG divergent sites per bp in ccds + 2kb flank                                                         |
| 621 | number ERV_classII in 5 kb downstream                                        | 1378 | frequency of GAATT in 5 kb flanking | 2135 | CT divergent sites per bp in ccds + 2kb flank                                                         |
| 622 | percentage ERV_classII in 5 kb downstream                                    | 1379 | frequency of GACAA in 5 kb flanking | 2136 | GT divergent sites per bp in ccds + 2kb flank                                                         |
| 623 | number MER1_type in 5 kb downstream                                          | 1380 | frequency of GACAC in 5 kb flanking | 2137 | proportion unalignable (gaps in human or other species) per bp in ccds + 2kb flank                    |
| 624 | percentage MER1_type in 5 kb downstream                                      | 1381 | frequency of GACAG in 5 kb flanking | 2138 | proportion unalignable (gaps in human) per bp in ccds + 2kb flank                                     |
| 625 | number MER2_type in 5 kb downstream                                          | 1382 | frequency of GACAT in 5 kb flanking | 2139 | proportion unalignable (gaps in other species) per bp in ccds + 2kb flank                             |
| 626 | percentage MER2_type in 5 kb downstream                                      | 1383 | frequency of GACCA in 5 kb flanking | 2140 | proportion of divergent sites per bp in ccds + 5 kb flank                                             |
| 627 | number unclassified in 5 kb downstream                                       | 1384 | frequency of GACCC in 5 kb flanking | 2141 | number of divergent sites in total in ccds + 5 kb flank                                               |
| 628 | percentage unclassified in 5 kb downstream                                   | 1385 | frequency of GACCG in 5 kb flanking | 2142 | proportion of divergent sites per bp, including gaps in ccds + 5 kb flank                             |
| 629 | number small RNA in 5 kb downstream                                          | 1386 | frequency of GACCT in 5 kb flanking | 2143 | number of divergent sites in total, including gaps in ccds + 5 kb flank                               |
| 630 | percentage small RNA in 5 kb downstream                                      | 1387 | frequency of GACGA in 5 kb flanking | 2144 | proportion of divergent transitions per bp in ccds + 5 kb flank                                       |
| 631 | number satellites in 5 kb downstream                                         | 1388 | frequency of GACGC in 5 kb flanking | 2145 | number of divergent transitions in ccds + 5 kb flank                                                  |
| 632 | percentage satellites in 5 kb downstream                                     | 1389 | frequency of GACGG in 5 kb flanking | 2146 | proportion of divergent transversions per bp in ccds + 5 kb flank                                     |
| 633 | number simple repeats in 5 kb downstream                                     | 1390 | frequency of GACGT in 5 kb flanking | 2147 | number of divergent transversions in ccds + 5 kb flank                                                |
| 634 | percentage simple repeats in 5 kb downstream                                 | 1391 | frequency of GACTA in 5 kb flanking | 2148 | proportion of divergent sites (no gaps) that are transitions in ccds + 5 kb flank                     |
| 635 | number low complexity in 5 kb downstream                                     | 1392 | frequency of GACTC in 5 kb flanking | 2149 | proportion of divergent sites that (no gaps) are transversions in ccds + 5 kb flank                   |
| 636 | percentage low complexity in 5 kb downstream                                 | 1393 | frequency of GACTG in 5 kb flanking | 2150 | proportion of total divergent sites that are gaps, including gaps in ccds + 5 kb flank                |
| 637 | total repeats (number SINEs + LINEs + LTR + DNA elements) in 5 kb downstream | 1394 | frequency of GACTT in 5 kb flanking | 2151 | proportion of AC divergent sites relative to total num divergent sites (no gaps) in ccds + 5 kb flank |

|     |                                          |      |                                     |      |                                                                                                        |
|-----|------------------------------------------|------|-------------------------------------|------|--------------------------------------------------------------------------------------------------------|
| 638 | GC content in 10 kb upstream             | 1395 | frequency of GAGAA in 5 kb flanking | 2152 | proportion of AG divergent sites relative to total num divergent sites (no gaps) in ccds + 5 kb flank  |
| 639 | total % bases masked in 10 kb upstream   | 1396 | frequency of GAGAC in 5 kb flanking | 2153 | proportion of AT divergent sites relative to total num divergent sites (no gaps) in ccds + 5 kb flank  |
| 640 | number SINEs in 10 kb upstream           | 1397 | frequency of GAGAG in 5 kb flanking | 2154 | proportion of CG divergent sites relative to total num divergent sites (no gaps) in ccds + 5 kb flank  |
| 641 | percentage SINEs in 10 kb upstream       | 1398 | frequency of GAGAT in 5 kb flanking | 2155 | proportion of CT divergent sites relative to total num divergent sites (no gaps) in ccds + 5 kb flank  |
| 642 | number ALUs in 10 kb upstream            | 1399 | frequency of GAGCA in 5 kb flanking | 2156 | proportion of GT divergent sites relative to total num divergent sites (no gaps) in ccds + 5 kb flank  |
| 643 | percentage ALUs in 10 kb upstream        | 1400 | frequency of GAGCC in 5 kb flanking | 2157 | AC divergent sites per bp in ccds + 5 kb flank                                                         |
| 644 | number MIRs in 10 kb upstream            | 1401 | frequency of GAGCG in 5 kb flanking | 2158 | AG divergent sites per bp in ccds + 5 kb flank                                                         |
| 645 | percentage MIRs in 10 kb upstream        | 1402 | frequency of GAGCT in 5 kb flanking | 2159 | AT divergent sites per bp in ccds + 5 kb flank                                                         |
| 646 | number LINEs in 10 kb upstream           | 1403 | frequency of GAGGA in 5 kb flanking | 2160 | CG divergent sites per bp in ccds + 5 kb flank                                                         |
| 647 | percentage LINEs in 10 kb upstream       | 1404 | frequency of GAGGC in 5 kb flanking | 2161 | CT divergent sites per bp in ccds + 5 kb flank                                                         |
| 648 | number LINE1 in 10 kb upstream           | 1405 | frequency of GAGGG in 5 kb flanking | 2162 | GT divergent sites per bp in ccds + 5 kb flank                                                         |
| 649 | percentage LINE1 in 10 kb upstream       | 1406 | frequency of GAGGT in 5 kb flanking | 2163 | proportion unalignable (gaps in human or other species) per bp in ccds + 5 kb flank                    |
| 650 | number LINE2 in 10 kb upstream           | 1407 | frequency of GAGTA in 5 kb flanking | 2164 | proportion unalignable (gaps in human) per bp in ccds + 5 kb flank                                     |
| 651 | percentage LINE2 in 10 kb upstream       | 1408 | frequency of GAGTC in 5 kb flanking | 2165 | proportion unalignable (gaps in other species) per bp in ccds + 5 kb flank                             |
| 652 | number L3/CR1 in 10 kb upstream          | 1409 | frequency of GAGTG in 5 kb flanking | 2166 | proportion of divergent sites per bp in ccds + 10 kb flank                                             |
| 653 | percentage L3/CR1 in 10 kb upstream      | 1410 | frequency of GAGTT in 5 kb flanking | 2167 | number of divergent sites in total in ccds + 10 kb flank                                               |
| 654 | number LTR in 10 kb upstream             | 1411 | frequency of GATAA in 5 kb flanking | 2168 | proportion of divergent sites per bp, including gaps in ccds + 10 kb flank                             |
| 655 | percentage LTR in 10 kb upstream         | 1412 | frequency of GATAC in 5 kb flanking | 2169 | number of divergent sites in total, including gaps in ccds + 10 kb flank                               |
| 656 | number MaLRs in 10 kb upstream           | 1413 | frequency of GATAG in 5 kb flanking | 2170 | proportion of divergent transitions per bp in ccds + 10 kb flank                                       |
| 657 | percentage MaLRs in 10 kb upstream       | 1414 | frequency of GATAT in 5 kb flanking | 2171 | number of divergent transitions in ccds + 10 kb flank                                                  |
| 658 | number ERVL in 10 kb upstream            | 1415 | frequency of GATCA in 5 kb flanking | 2172 | proportion of divergent transversions per bp in ccds + 10 kb flank                                     |
| 659 | percentage ERVL in 10 kb upstream        | 1416 | frequency of GATCC in 5 kb flanking | 2173 | number of divergent transversions in ccds + 10 kb flank                                                |
| 660 | number ERV_classI in 10 kb upstream      | 1417 | frequency of GATCG in 5 kb flanking | 2174 | proportion of divergent sites (no gaps) that are transitions in ccds + 10 kb flank                     |
| 661 | percentage ERV_classI in 10 kb upstream  | 1418 | frequency of GATCT in 5 kb flanking | 2175 | proportion of divergent sites that (no gaps) are transversions in ccds + 10 kb flank                   |
| 662 | number ERV_classII in 10 kb upstream     | 1419 | frequency of GATGA in 5 kb flanking | 2176 | proportion of total divergent sites that are gaps, including gaps in ccds + 10 kb flank                |
| 663 | percentage ERV_classII in 10 kb upstream | 1420 | frequency of GATGC in 5 kb flanking | 2177 | proportion of AC divergent sites relative to total num divergent sites (no gaps) in ccds + 10 kb flank |

|     |                                                                             |      |                                     |      |                                                                                                        |
|-----|-----------------------------------------------------------------------------|------|-------------------------------------|------|--------------------------------------------------------------------------------------------------------|
| 664 | number DNA elements in 10 kb upstream                                       | 1421 | frequency of GATGG in 5 kb flanking | 2178 | proportion of AG divergent sites relative to total num divergent sites (no gaps) in ccds + 10 kb flank |
| 665 | percentage DNA elements in 10 kb upstream                                   | 1422 | frequency of GATGT in 5 kb flanking | 2179 | proportion of AT divergent sites relative to total num divergent sites (no gaps) in ccds + 10 kb flank |
| 666 | number MER1_type in 10 kb upstream                                          | 1423 | frequency of GATTA in 5 kb flanking | 2180 | proportion of CG divergent sites relative to total num divergent sites (no gaps) in ccds + 10 kb flank |
| 667 | percentage MER1_type in 10 kb upstream                                      | 1424 | frequency of GATTC in 5 kb flanking | 2181 | proportion of CT divergent sites relative to total num divergent sites (no gaps) in ccds + 10 kb flank |
| 668 | number MER2_type in 10 kb upstream                                          | 1425 | frequency of GATTG in 5 kb flanking | 2182 | proportion of GT divergent sites relative to total num divergent sites (no gaps) in ccds + 10 kb flank |
| 669 | percentage MER2_type in 10 kb upstream                                      | 1426 | frequency of GATTT in 5 kb flanking | 2183 | AC divergent sites per bp in ccds + 10 kb flank                                                        |
| 670 | number unclassified in 10 kb upstream                                       | 1427 | frequency of GCAAA in 5 kb flanking | 2184 | AG divergent sites per bp in ccds + 10 kb flank                                                        |
| 671 | percentage unclassified in 10 kb upstream                                   | 1428 | frequency of GCAAC in 5 kb flanking | 2185 | AT divergent sites per bp in ccds + 10 kb flank                                                        |
| 672 | number small RNA in 10 kb upstream                                          | 1429 | frequency of GCAAG in 5 kb flanking | 2186 | CG divergent sites per bp in ccds + 10 kb flank                                                        |
| 673 | percentage small RNA in 10 kb upstream                                      | 1430 | frequency of GCAAT in 5 kb flanking | 2187 | CT divergent sites per bp in ccds + 10 kb flank                                                        |
| 674 | number satellites in 10 kb upstream                                         | 1431 | frequency of GCACA in 5 kb flanking | 2188 | GT divergent sites per bp in ccds + 10 kb flank                                                        |
| 675 | percentage satellites in 10 kb upstream                                     | 1432 | frequency of GCACC in 5 kb flanking | 2189 | proportion unalignable (gaps in human or other species) per bp in ccds + 10 kb flank                   |
| 676 | number simple repeats in 10 kb upstream                                     | 1433 | frequency of GCACG in 5 kb flanking | 2190 | proportion unalignable (gaps in human) per bp in ccds + 10 kb flank                                    |
| 677 | percentage simple repeats in 10 kb upstream                                 | 1434 | frequency of GCACT in 5 kb flanking | 2191 | proportion unalignable (gaps in other species) per bp in ccds + 10 kb flank                            |
| 678 | number low complexity in 10 kb upstream                                     | 1435 | frequency of GCAGA in 5 kb flanking | 2192 | proportion of divergent sites per bp in 2 kb flank                                                     |
| 679 | percentage low complexity in 10 kb upstream                                 | 1436 | frequency of GCAGC in 5 kb flanking | 2193 | number of divergent sites in total in 2 kb flank                                                       |
| 680 | total repeats (number SINES + LINES + LTR + DNA elements) in 10 kb upstream | 1437 | frequency of GCAGG in 5 kb flanking | 2194 | proportion of divergent sites per bp, including gaps in 2 kb flank                                     |
| 681 | GC content in 10 kb downstream                                              | 1438 | frequency of GCAGT in 5 kb flanking | 2195 | number of divergent sites in total, including gaps in 2 kb flank                                       |
| 682 | total % bases masked in 10 kb downstream                                    | 1439 | frequency of GCATA in 5 kb flanking | 2196 | proportion of divergent transitions per bp in 2 kb flank                                               |
| 683 | number SINES in 10 kb downstream                                            | 1440 | frequency of GCATC in 5 kb flanking | 2197 | number of divergent transitions in 2 kb flank                                                          |
| 684 | percentage SINES in 10 kb downstream                                        | 1441 | frequency of GCATG in 5 kb flanking | 2198 | proportion of divergent transversions per bp in 2 kb flank                                             |
| 685 | number ALUs in 10 kb downstream                                             | 1442 | frequency of GCATT in 5 kb flanking | 2199 | number of divergent transversions in 2 kb flank                                                        |
| 686 | percentage ALUs in 10 kb downstream                                         | 1443 | frequency of GCCAA in 5 kb flanking | 2200 | proportion of divergent sites (no gaps) that are transitions in 2 kb flank                             |
| 687 | number MIRs in 10 kb downstream                                             | 1444 | frequency of GCCAC in 5 kb flanking | 2201 | proportion of divergent sites that (no gaps) are transversions in 2 kb flank                           |
| 688 | percentage MIRs in 10 kb downstream                                         | 1445 | frequency of GCCAG in 5 kb flanking | 2202 | proportion of total divergent sites that are gaps, including gaps in 2 kb flank                        |
| 689 | number LINES in 10 kb downstream                                            | 1446 | frequency of GCCAT in 5 kb flanking | 2203 | proportion of AC divergent sites relative to total num divergent sites (no gaps) in 2 kb flank         |

|     |                                             |      |                                     |      |                                                                                                |
|-----|---------------------------------------------|------|-------------------------------------|------|------------------------------------------------------------------------------------------------|
| 690 | percentage LINEs in 10 kb downstream        | 1447 | frequency of GCCCA in 5 kb flanking | 2204 | proportion of AG divergent sites relative to total num divergent sites (no gaps) in 2 kb flank |
| 691 | number LINE1 in 10 kb downstream            | 1448 | frequency of GCCCC in 5 kb flanking | 2205 | proportion of AT divergent sites relative to total num divergent sites (no gaps) in 2 kb flank |
| 692 | percentage LINE1 in 10 kb downstream        | 1449 | frequency of GCCCG in 5 kb flanking | 2206 | proportion of CG divergent sites relative to total num divergent sites (no gaps) in 2 kb flank |
| 693 | number LINE2 in 10 kb downstream            | 1450 | frequency of GCCCT in 5 kb flanking | 2207 | proportion of CT divergent sites relative to total num divergent sites (no gaps) in 2 kb flank |
| 694 | percentage LINE2 in 10 kb downstream        | 1451 | frequency of GCCGA in 5 kb flanking | 2208 | proportion of GT divergent sites relative to total num divergent sites (no gaps) in 2 kb flank |
| 695 | number L3/CR1 in 10 kb downstream           | 1452 | frequency of GCCGC in 5 kb flanking | 2209 | AC divergent sites per bp in 2 kb flank                                                        |
| 696 | percentage L3/CR1 in 10 kb downstream       | 1453 | frequency of GCCGG in 5 kb flanking | 2210 | AG divergent sites per bp in 2 kb flank                                                        |
| 697 | number LTR in 10 kb downstream              | 1454 | frequency of GCCGT in 5 kb flanking | 2211 | AT divergent sites per bp in 2 kb flank                                                        |
| 698 | percentage LTR in 10 kb downstream          | 1455 | frequency of GCCTA in 5 kb flanking | 2212 | CG divergent sites per bp in 2 kb flank                                                        |
| 699 | number MaLRs in 10 kb downstream            | 1456 | frequency of GCCTC in 5 kb flanking | 2213 | CT divergent sites per bp in 2 kb flank                                                        |
| 700 | percentage MaLRs in 10 kb downstream        | 1457 | frequency of GCCTG in 5 kb flanking | 2214 | GT divergent sites per bp in 2 kb flank                                                        |
| 701 | number ERVL in 10 kb downstream             | 1458 | frequency of GCCTT in 5 kb flanking | 2215 | proportion unalignable (gaps in human or other species) per bp in 2 kb flank                   |
| 702 | percentage ERVL in 10 kb downstream         | 1459 | frequency of GCGAA in 5 kb flanking | 2216 | proportion unalignable (gaps in human) per bp in 2 kb flank                                    |
| 703 | number ERV_classI in 10 kb downstream       | 1460 | frequency of GCGAC in 5 kb flanking | 2217 | proportion unalignable (gaps in other species) per bp in 2 kb flank                            |
| 704 | percentage ERV_classI in 10 kb downstream   | 1461 | frequency of GCGAG in 5 kb flanking | 2218 | proportion of divergent sites per bp in 5 kb flank                                             |
| 705 | number ERV_classII in 10 kb downstream      | 1462 | frequency of GCGAT in 5 kb flanking | 2219 | number of divergent sites in total in 5 kb flank                                               |
| 706 | percentage ERV_classII in 10 kb downstream  | 1463 | frequency of GCGCA in 5 kb flanking | 2220 | proportion of divergent sites per bp, including gaps in 5 kb flank                             |
| 707 | number MER1_type in 10 kb downstream        | 1464 | frequency of GCGCC in 5 kb flanking | 2221 | number of divergent sites in total, including gaps in 5 kb flank                               |
| 708 | percentage MER1_type in 10 kb downstream    | 1465 | frequency of GCGCG in 5 kb flanking | 2222 | proportion of divergent transitions per bp in 5 kb flank                                       |
| 709 | number MER2_type in 10 kb downstream        | 1466 | frequency of GCGCT in 5 kb flanking | 2223 | number of divergent transitions in 5 kb flank                                                  |
| 710 | percentage MER2_type in 10 kb downstream    | 1467 | frequency of GCGGA in 5 kb flanking | 2224 | proportion of divergent transversions per bp in 5 kb flank                                     |
| 711 | number unclassified in 10 kb downstream     | 1468 | frequency of GCGGC in 5 kb flanking | 2225 | number of divergent transversions in 5 kb flank                                                |
| 712 | percentage unclassified in 10 kb downstream | 1469 | frequency of GCGGG in 5 kb flanking | 2226 | proportion of divergent sites (no gaps) that are transitions in 5 kb flank                     |
| 713 | number small RNA in 10 kb downstream        | 1470 | frequency of GCGGT in 5 kb flanking | 2227 | proportion of divergent sites that (no gaps) are transversions in 5 kb flank                   |
| 714 | percentage small RNA in 10 kb downstream    | 1471 | frequency of GCGTA in 5 kb flanking | 2228 | proportion of total divergent sites that are gaps, including gaps in 5 kb flank                |
| 715 | number satellites in 10 kb downstream       | 1472 | frequency of GCGTC in 5 kb flanking | 2229 | proportion of AC divergent sites relative to total num divergent sites (no gaps) in 5 kb flank |
| 716 | percentage satellites in 10 kb downstream   | 1473 | frequency of GCGTG in 5 kb flanking | 2230 | proportion of AG divergent sites relative to total num divergent sites (no gaps) in 5 kb flank |

|     |                                                                               |      |                                     |      |                                                                                                 |
|-----|-------------------------------------------------------------------------------|------|-------------------------------------|------|-------------------------------------------------------------------------------------------------|
| 717 | number simple repeats in 10 kb downstream                                     | 1474 | frequency of GCGTT in 5 kb flanking | 2231 | proportion of AT divergent sites relative to total num divergent sites (no gaps) in 5 kb flank  |
| 718 | percentage simple repeats in 10 kb downstream                                 | 1475 | frequency of GCTAA in 5 kb flanking | 2232 | proportion of CG divergent sites relative to total num divergent sites (no gaps) in 5 kb flank  |
| 719 | number low complexity in 10 kb downstream                                     | 1476 | frequency of GCTAC in 5 kb flanking | 2233 | proportion of CT divergent sites relative to total num divergent sites (no gaps) in 5 kb flank  |
| 720 | percentage low complexity in 10 kb downstream                                 | 1477 | frequency of GCTAG in 5 kb flanking | 2234 | proportion of GT divergent sites relative to total num divergent sites (no gaps) in 5 kb flank  |
| 721 | total repeats (number SINEs + LINEs + LTR + DNA elements) in 10 kb downstream | 1478 | frequency of GCTAT in 5 kb flanking | 2235 | AC divergent sites per bp in 5 kb flank                                                         |
| 722 | GC content in ccds plus 2kb flanking                                          | 1479 | frequency of GCTCA in 5 kb flanking | 2236 | AG divergent sites per bp in 5 kb flank                                                         |
| 723 | total % bases masked in ccds plus 2kb flanking                                | 1480 | frequency of GCTCC in 5 kb flanking | 2237 | AT divergent sites per bp in 5 kb flank                                                         |
| 724 | number SINEs in ccds plus 2kb flanking                                        | 1481 | frequency of GCTCG in 5 kb flanking | 2238 | CG divergent sites per bp in 5 kb flank                                                         |
| 725 | percentage SINEs in ccds plus 2kb flanking                                    | 1482 | frequency of GCTCT in 5 kb flanking | 2239 | CT divergent sites per bp in 5 kb flank                                                         |
| 726 | number ALUs in ccds plus 2kb flanking                                         | 1483 | frequency of GCTGA in 5 kb flanking | 2240 | GT divergent sites per bp in 5 kb flank                                                         |
| 727 | percentage ALUs in ccds plus 2kb flanking                                     | 1484 | frequency of GCTGC in 5 kb flanking | 2241 | proportion unalignable (gaps in human or other species) per bp in 5 kb flank                    |
| 728 | number MIRs in ccds plus 2kb flanking                                         | 1485 | frequency of GCTGG in 5 kb flanking | 2242 | proportion unalignable (gaps in human) per bp in 5 kb flank                                     |
| 729 | percentage MIRs in ccds plus 2kb flanking                                     | 1486 | frequency of GCTGT in 5 kb flanking | 2243 | proportion unalignable (gaps in other species) per bp in 5 kb flank                             |
| 730 | number LINEs in ccds plus 2kb flanking                                        | 1487 | frequency of GCTTA in 5 kb flanking | 2244 | proportion of divergent sites per bp in 10 kb flank                                             |
| 731 | percentage LINEs in ccds plus 2kb flanking                                    | 1488 | frequency of GCTTC in 5 kb flanking | 2245 | number of divergent sites in total in 10 kb flank                                               |
| 732 | number LINE1 in ccds plus 2kb flanking                                        | 1489 | frequency of GCTTG in 5 kb flanking | 2246 | proportion of divergent sites per bp, including gaps in 10 kb flank                             |
| 733 | percentage LINE1 in ccds plus 2kb flanking                                    | 1490 | frequency of GCTTT in 5 kb flanking | 2247 | number of divergent sites in total, including gaps in 10 kb flank                               |
| 734 | number LINE2 in ccds plus 2kb flanking                                        | 1491 | frequency of GGAAA in 5 kb flanking | 2248 | proportion of divergent transitions per bp in 10 kb flank                                       |
| 735 | percentage LINE2 in ccds plus 2kb flanking                                    | 1492 | frequency of GGAAC in 5 kb flanking | 2249 | number of divergent transitions in 10 kb flank                                                  |
| 736 | number L3/CR1 in ccds plus 2kb flanking                                       | 1493 | frequency of GGAAG in 5 kb flanking | 2250 | proportion of divergent transversions per bp in 10 kb flank                                     |
| 737 | percentage L3/CR1 in ccds plus 2kb flanking                                   | 1494 | frequency of GGAAT in 5 kb flanking | 2251 | number of divergent transversions in 10 kb flank                                                |
| 738 | number LTR in ccds plus 2kb flanking                                          | 1495 | frequency of GGACA in 5 kb flanking | 2252 | proportion of divergent sites (no gaps) that are transitions in 10 kb flank                     |
| 739 | percentage LTR in ccds plus 2kb flanking                                      | 1496 | frequency of GGACC in 5 kb flanking | 2253 | proportion of divergent sites that (no gaps) are transversions in 10 kb flank                   |
| 740 | number MaLRs in ccds plus 2kb flanking                                        | 1497 | frequency of GGACG in 5 kb flanking | 2254 | proportion of total divergent sites that are gaps, including gaps in 10 kb flank                |
| 741 | percentage MaLRs in ccds plus 2kb flanking                                    | 1498 | frequency of GGACT in 5 kb flanking | 2255 | proportion of AC divergent sites relative to total num divergent sites (no gaps) in 10 kb flank |
| 742 | number ERVL in ccds plus 2kb flanking                                         | 1499 | frequency of GGAGA in 5 kb flanking | 2256 | proportion of AG divergent sites relative to total num divergent sites (no gaps) in 10 kb flank |

|     |                                                   |      |                                     |      |                                                                                                 |
|-----|---------------------------------------------------|------|-------------------------------------|------|-------------------------------------------------------------------------------------------------|
| 743 | percentage ERVL in ccds plus 2kb flanking         | 1500 | frequency of GGAGC in 5 kb flanking | 2257 | proportion of AT divergent sites relative to total num divergent sites (no gaps) in 10 kb flank |
| 744 | number ERV_classI in ccds plus 2kb flanking       | 1501 | frequency of GGAGG in 5 kb flanking | 2258 | proportion of CG divergent sites relative to total num divergent sites (no gaps) in 10 kb flank |
| 745 | percentage ERV_classI in ccds plus 2kb flanking   | 1502 | frequency of GGAGT in 5 kb flanking | 2259 | proportion of CT divergent sites relative to total num divergent sites (no gaps) in 10 kb flank |
| 746 | number ERV_classII in ccds plus 2kb flanking      | 1503 | frequency of GGATA in 5 kb flanking | 2260 | proportion of GT divergent sites relative to total num divergent sites (no gaps) in 10 kb flank |
| 747 | percentage ERV_classII in ccds plus 2kb flanking  | 1504 | frequency of GGATC in 5 kb flanking | 2261 | AC divergent sites per bp in 10 kb flank                                                        |
| 748 | number DNA elements in ccds plus 2kb flanking     | 1505 | frequency of GGATG in 5 kb flanking | 2262 | AG divergent sites per bp in 10 kb flank                                                        |
| 749 | percentage DNA elements in ccds plus 2kb flanking | 1506 | frequency of GGATT in 5 kb flanking | 2263 | AT divergent sites per bp in 10 kb flank                                                        |
| 750 | number MER1_type in ccds plus 2kb flanking        | 1507 | frequency of GGCAA in 5 kb flanking | 2264 | CG divergent sites per bp in 10 kb flank                                                        |
| 751 | percentage MER1_type in ccds plus 2kb flanking    | 1508 | frequency of GGCAC in 5 kb flanking | 2265 | CT divergent sites per bp in 10 kb flank                                                        |
| 752 | number MER2_type in ccds plus 2kb flanking        | 1509 | frequency of GGCAG in 5 kb flanking | 2266 | GT divergent sites per bp in 10 kb flank                                                        |
| 753 | percentage MER2_type in ccds plus 2kb flanking    | 1510 | frequency of GGCAT in 5 kb flanking | 2267 | proportion unalignable (gaps in human or other species) per bp in 10 kb flank                   |
| 754 | number unclassified in ccds plus 2kb flanking     | 1511 | frequency of GGCCA in 5 kb flanking | 2268 | proportion unalignable (gaps in human) per bp in 10 kb flank                                    |
| 755 | percentage unclassified in ccds plus 2kb flanking | 1512 | frequency of GGCCC in 5 kb flanking | 2269 | proportion unalignable (gaps in other species) per bp in 10 kb flank                            |
| 756 | number small RNA in ccds plus 2kb flanking        | 1513 | frequency of GGCCG in 5 kb flanking |      |                                                                                                 |
| 757 | percentage small RNA in ccds plus 2kb flanking    | 1514 | frequency of GGCCT in 5 kb flanking |      |                                                                                                 |

Table S3: 500 features most commonly retained in the 469 feature model. Features are ranked by the proportion of cases in which they were included in the 469 feature model, over 287 instances of leave one out cross-validation. Thus, features listed with a proportion of 1 were included in the final 469 feature model in every set of cross-validation feature eliminations.

| Feature ID                                                             | Proportion | Feature ID                           | Proportion | Feature ID                                                                                  | Proportion |
|------------------------------------------------------------------------|------------|--------------------------------------|------------|---------------------------------------------------------------------------------------------|------------|
| proportion of transitions in the CCDS relative to total number of SNPs | 100        | frequency of GGACC in 5 kb flanking  | 100.00     | proportion of CG divergent sites relative to total num divergent sites (no gaps) in ccds    | 97.56      |
| number of A-T SNPs in exons                                            | 100        | frequency of GGAGG in 5 kb flanking  | 100.00     | percentage unclassified in 5 kb downstream                                                  | 97.21      |
| number of C-T SNPs in exons                                            | 100        | frequency of GGATG in 5 kb flanking  | 100.00     | frequency of TATCT in 5 kb flanking                                                         | 97.21      |
| number of transversions in exons                                       | 100        | frequency of GGCCC in 5 kb flanking  | 100.00     | percentage unclassified in ccds plus 2kb flanking                                           | 96.86      |
| proportion of C-G SNPs in exons relative to total num SNPs             | 100        | frequency of GGGTT in 5 kb flanking  | 100.00     | frequency of TAGGG in 5 kb flanking                                                         | 96.86      |
| proportion of G-T SNPs in introns relative to total num SNPs           | 100        | frequency of GGTA A in 5 kb flanking | 100.00     | frequency of TCGAT in 5 kb flanking                                                         | 96.86      |
| proportion of C-T SNPs in 2 kb up relative to total num SNPs           | 100        | frequency of GGTAG in 5 kb flanking  | 100.00     | frequency of ATGTA in 5 kb flanking                                                         | 96.52      |
| C-G SNPs per bp in 2 kb up                                             | 100        | frequency of GGTAT in 5 kb flanking  | 100.00     | frequency of GCGAT in 5 kb flanking                                                         | 96.52      |
| proportion of A-C SNPs in 2 kb down relative to total num SNPs         | 100        | frequency of GGTCG in 5 kb flanking  | 100.00     | number of A-T SNPs in 2 kb up                                                               | 96.17      |
| transitions per bp in 2 kb down                                        | 100        | frequency of GGTGT in 5 kb flanking  | 100.00     | C-G SNPs per bp in ccds plus 10kb flanking                                                  | 96.17      |
| proportion of C-T SNPs in 5 kb up relative to total num SNPs           | 100        | frequency of GTAAG in 5 kb flanking  | 100.00     | frequency of AATGA in 5 kb flanking                                                         | 96.17      |
| number of A-G SNPs in 5 kb down                                        | 100        | frequency of GTACA in 5 kb flanking  | 100.00     | frequency of ATAAT in 5 kb flanking                                                         | 96.17      |
| proportion of transitions in 5 kb down relative to total num of SNPs   | 100        | frequency of GTAGG in 5 kb flanking  | 100.00     | frequency of GCTGA in 5 kb flanking                                                         | 96.17      |
| proportion of A-C SNPs in 5 kb down relative to total num SNPs         | 100        | frequency of GTATA in 5 kb flanking  | 100.00     | CT divergent sites per bp in ccds                                                           | 96.17      |
| A-G SNPs per bp in 5 kb down                                           | 100        | frequency of GTCCG in 5 kb flanking  | 100.00     | frequency of GTAGT in 5 kb flanking                                                         | 95.82      |
| total snps per bp in 5 kb down                                         | 100        | frequency of GTCGG in 5 kb flanking  | 100.00     | number ALUs in 10 kb upstream                                                               | 95.47      |
| number of A-G SNPs in 10 kb up                                         | 100        | frequency of GTGAT in 5 kb flanking  | 100.00     | frequency of ACGTT in 5 kb flanking                                                         | 95.47      |
| number of A-T SNPs in 10 kb up                                         | 100        | frequency of GTGCA in 5 kb flanking  | 100.00     | frequency of CCACC in 5 kb flanking                                                         | 95.47      |
| number of C-G SNPs in 10 kb up                                         | 100        | frequency of GTGCG in 5 kb flanking  | 100.00     | number of exons in the gene                                                                 | 95.47      |
| number of G-T SNPs in 10 kb up                                         | 100        | frequency of GTGTG in 5 kb flanking  | 100.00     | A-T SNPs per bp in 2 kb up                                                                  | 95.12      |
| number of total SNPS in 10 kb up                                       | 100        | frequency of GTTCC in 5 kb flanking  | 100.00     | frequency of CAAAT in 5 kb flanking                                                         | 95.12      |
| number of transitions in 10 kb up                                      | 100        | frequency of TAACC in 5 kb flanking  | 100.00     | proportion of CT divergent sites relative to total num divergent sites (no gaps) in 5 kb up | 95.12      |
| number of transversions in 10 kb up                                    | 100        | frequency of TAATA in 5 kb flanking  | 100.00     | transversions per bp in exons                                                               | 94.77      |
| proportion of transitions in 10 kb up relative to total num of SNPs    | 100        | frequency of TACGA in 5 kb flanking  | 100.00     | percentage SINEs in 2 kb downstream                                                         | 94.43      |
| proportion of A-C SNPs in 10 kb up relative to total num SNPs          | 100        | frequency of TACTC in 5 kb flanking  | 100.00     | number of C-T SNPs in 2 kb up                                                               | 93.73      |
| proportion of G-T SNPs in 10 kb up relative to total num SNPs          | 100        | frequency of TAGCC in 5 kb flanking  | 100.00     | C-T SNPs per bp in 2 kb up                                                                  | 93.73      |
| A-G SNPs per bp in 10 kb up                                            | 100        | frequency of TAGCG in 5 kb flanking  | 100.00     | frequency of AAGAG in 5 kb flanking                                                         | 93.73      |

|                                                                                       |     |                                     |        |                                                                                              |       |
|---------------------------------------------------------------------------------------|-----|-------------------------------------|--------|----------------------------------------------------------------------------------------------|-------|
| A-T SNPs per bp in 10 kb up                                                           | 100 | frequency of TAGCT in 5 kb flanking | 100.00 | frequency of TGCTG in 5 kb flanking                                                          | 93.73 |
| C-G SNPs per bp in 10 kb up                                                           | 100 | frequency of TAGTG in 5 kb flanking | 100.00 | transitions per bp in the CCDS                                                               | 93.38 |
| G-T SNPs per bp in 10 kb up                                                           | 100 | frequency of TATGG in 5 kb flanking | 100.00 | percentage ERVL in 2kb upstream                                                              | 93.38 |
| transitions per bp in 10 kb up                                                        | 100 | frequency of TCAAG in 5 kb flanking | 100.00 | percentage satellites in 10 kb downstream                                                    | 93.38 |
| transversions per bp 10 kb up                                                         | 100 | frequency of TCACC in 5 kb flanking | 100.00 | proportion of AT divergent sites relative to total num divergent sites (no gaps) in 10 kb up | 93.38 |
| total snps per bp in 10 kb up                                                         | 100 | frequency of TCAGT in 5 kb flanking | 100.00 | AT divergent sites per bp in 2 kb flank                                                      | 93.38 |
| proportion of G-T SNPs in 10 kb down relative to total num SNPs                       | 100 | frequency of TCATT in 5 kb flanking | 100.00 | number LINE1 in ccds plus 5 kb flanking                                                      | 93.03 |
| proportion of A-C SNPs in ccds plus 10kb flanking relative to total num SNPs          | 100 | frequency of TCCCC in 5 kb flanking | 100.00 | frequency of TCGTT in 5 kb flanking                                                          | 93.03 |
| A-T SNPs per bp in ccds plus 10kb flanking                                            | 100 | frequency of TCGCC in 5 kb flanking | 100.00 | CG divergent sites per bp in introns                                                         | 92.68 |
| number of C-T SNPs in 2kb flanking                                                    | 100 | frequency of TCGTC in 5 kb flanking | 100.00 | frequency of CCTTC in 5 kb flanking                                                          | 92.33 |
| C-T SNPs per bp in 2kb flanking                                                       | 100 | frequency of TCTTG in 5 kb flanking | 100.00 | frequency of CGGAG in 5 kb flanking                                                          | 92.33 |
| number of A-G SNPs in 5kb flanking                                                    | 100 | frequency of TGAAA in 5 kb flanking | 100.00 | number L3/CR1 in 5 kb downstream                                                             | 91.99 |
| A-G SNPs per bp in 5kb flanking                                                       | 100 | frequency of TGATT in 5 kb flanking | 100.00 | frequency of AAGCT in 5 kb flanking                                                          | 91.99 |
| number of C-G SNPs in 10kb flanking                                                   | 100 | frequency of TGCCT in 5 kb flanking | 100.00 | frequency of AGGCT in 5 kb flanking                                                          | 91.99 |
| C-G SNPs per bp in 10kb flanking                                                      | 100 | frequency of TGGCG in 5 kb flanking | 100.00 | frequency of TCGGC in 5 kb flanking                                                          | 91.99 |
| proportion of transitions in introns plus 5 kb flanking relative to total num of SNPs | 100 | frequency of TGCTC in 5 kb flanking | 100.00 | frequency of AACTG in 5 kb flanking                                                          | 91.64 |
| proportion of G-T SNPs in introns plus 5 kb flanking relative to total num SNPs       | 100 | frequency of TTAAA in 5 kb flanking | 100.00 | frequency of CCTGT in 5 kb flanking                                                          | 91.64 |
| number of synonymous snps                                                             | 100 | frequency of TTAAT in 5 kb flanking | 100.00 | frequency of GCGGT in 5 kb flanking                                                          | 91.64 |
| number ERV classI in ccds                                                             | 100 | frequency of TTATA in 5 kb flanking | 100.00 | frequency of GTAGA in 5 kb flanking                                                          | 90.94 |
| total repeats in ccds                                                                 | 100 | frequency of TTATC in 5 kb flanking | 100.00 | frequency of TAATG in 5 kb flanking                                                          | 90.94 |
| percentage ALUs in 2kb upstream                                                       | 100 | frequency of TTATT in 5 kb flanking | 100.00 | percentage MER1_type in 2kb upstream                                                         | 89.90 |
| number MIRs in 2kb upstream                                                           | 100 | frequency of TTCGC in 5 kb flanking | 100.00 | frequency of TGACC in 5 kb flanking                                                          | 89.20 |
| percentage L3/CR1 in 2kb upstream                                                     | 100 | frequency of TTGCT in 5 kb flanking | 100.00 | frequency of TTTGT in 5 kb flanking                                                          | 89.20 |
| percentage low complexity in 2kb upstream                                             | 100 | frequency of TTGGC in 5 kb flanking | 100.00 | number of transversions in introns                                                           | 88.85 |
| number SINEs in 2 kb downstream                                                       | 100 | frequency of TTGGG in 5 kb flanking | 100.00 | frequency of CTCCA in 5 kb flanking                                                          | 88.85 |
| number ALUs in 2 kb downstream                                                        | 100 | frequency of TTGGT in 5 kb flanking | 100.00 | proportion of AT divergent sites relative to total num divergent sites (no gaps) in 5 kb up  | 88.50 |
| percentage MIRs in 2 kb downstream                                                    | 100 | frequency of TTGTA in 5 kb flanking | 100.00 | frequency of CGAGA in 5 kb flanking                                                          | 88.15 |
| percentage low complexity in 2 kb downstream                                          | 100 | frequency of TTTCC in 5 kb flanking | 100.00 | frequency of CCTTG in 5 kb flanking                                                          | 87.46 |
| percentage LINE2 in 5 kb upstream                                                     | 100 | frequency of TTTCT in 5 kb flanking | 100.00 | frequency of TCGGA in 5 kb flanking                                                          | 87.46 |
| percentage LTR in 5 kb upstream                                                       | 100 | frequency of TTTGG in 5 kb flanking | 100.00 | frequency of AAGTT in 5 kb flanking                                                          | 87.11 |



|                                                    |     |                                                                                                |        |                                                                                                        |       |
|----------------------------------------------------|-----|------------------------------------------------------------------------------------------------|--------|--------------------------------------------------------------------------------------------------------|-------|
|                                                    |     | flanking                                                                                       |        | flanking                                                                                               |       |
| percentage simple repeats in 5 kb upstream         | 100 | frequency of TTTTC in 5 kb flanking                                                            | 100.00 | frequency of CGGGT in 5 kb flanking                                                                    | 87.11 |
| number MIRs in 5 kb downstream                     | 100 | frequency of TTTTG in 5 kb flanking                                                            | 100.00 | frequency of ACTTG in 5 kb flanking                                                                    | 86.41 |
| percentage MIRs in 5 kb downstream                 | 100 | number of divergent transversions in exons                                                     | 100.00 | frequency of TTGTT in 5 kb flanking                                                                    | 86.41 |
| percentage LINEs in 5 kb downstream                | 100 | proportion of CG divergent sites relative to total num divergent sites (no gaps) in exons      | 100.00 | frequency of TAAGC in 5 kb flanking                                                                    | 85.37 |
| number SINEs in 10 kb upstream                     | 100 | CG divergent sites per bp in exons                                                             | 100.00 | frequency of TAGCA in 5 kb flanking                                                                    | 84.67 |
| number LINEs in 10 kb upstream                     | 100 | proportion of AG divergent sites relative to total num divergent sites (no gaps) in introns    | 100.00 | A-T SNPs per bp in introns plus 2 kb flanking                                                          | 84.32 |
| number LINE1 in 10 kb upstream                     | 100 | proportion of AT divergent sites relative to total num divergent sites (no gaps) in 2 kb up    | 100.00 | frequency of ACACG in 5 kb flanking                                                                    | 84.32 |
| percentage unclassified in 10 kb upstream          | 100 | AT divergent sites per bp in 2 kb up                                                           | 100.00 | frequency of ACTCG in 5 kb flanking                                                                    | 84.32 |
| percentage low complexity in 10 kb upstream        | 100 | proportion of divergent sites that (no gaps) are transversions in 2 kb down                    | 100.00 | proportion of transitions in 2 kb up relative to total num of SNPs                                     | 83.97 |
| percentage MIRs in 10 kb downstream                | 100 | proportion of AG divergent sites relative to total num divergent sites (no gaps) in 2 kb down  | 100.00 | proportion of GT divergent sites relative to total num divergent sites (no gaps) in ccds + 10 kb flank | 83.97 |
| number LINEs in 10 kb downstream                   | 100 | number of divergent transitions in 5 kb up                                                     | 100.00 | number MaLRs in 5 kb upstream                                                                          | 83.28 |
| percentage LINEs in 10 kb downstream               | 100 | proportion of divergent transversions per bp in 5 kb up                                        | 100.00 | frequency of TCTCC in 5 kb flanking                                                                    | 82.93 |
| percentage LTR in 10 kb downstream                 | 100 | proportion of GT divergent sites relative to total num divergent sites (no gaps) in 5 kb up    | 100.00 | frequency of TATTC in 5 kb flanking                                                                    | 82.58 |
| number MaLRs in 10 kb downstream                   | 100 | AT divergent sites per bp in 5 kb up                                                           | 100.00 | percentage unclassified in 5 kb upstream                                                               | 82.23 |
| percentage unclassified in 10 kb downstream        | 100 | proportion of divergent sites that (no gaps) are transversions in 5 kb down                    | 100.00 | frequency of AAATG in 5 kb flanking                                                                    | 82.23 |
| percentage unclassified in ccds plus 5 kb flanking | 100 | AT divergent sites per bp in 5 kb down                                                         | 100.00 | proportion unalignable (gaps in human or other species) per bp in introns                              | 81.88 |
| number MaLRs in ccds plus 10 kb flanking           | 100 | proportion of CT divergent sites relative to total num divergent sites (no gaps) in 10 kb up   | 100.00 | number L3/CR1 in ccds plus 10 kb flanking                                                              | 79.44 |
| total repeats in ccds plus 10 kb flanking          | 100 | proportion of GT divergent sites relative to total num divergent sites (no gaps) in 10 kb up   | 100.00 | frequency of CCTAC in 5 kb flanking                                                                    | 79.44 |
| frequency of AAGAC in 5 kb flanking                | 100 | proportion of divergent sites that (no gaps) are transversions in 10 kb down                   | 100.00 | frequency of TCAAC in 5 kb flanking                                                                    | 79.44 |
| frequency of AAGCA in 5 kb flanking                | 100 | AC divergent sites per bp in 10 kb down                                                        | 100.00 | number LINEs in ccds plus 2kb flanking                                                                 | 79.09 |
| frequency of AAGCG in 5 kb flanking                | 100 | proportion of divergent sites that (no gaps) are transversions in ccds + 10 kb flank           | 100.00 | frequency of GTTGA in 5 kb flanking                                                                    | 78.40 |
| frequency of AAGGA in 5 kb flanking                | 100 | number of divergent transitions in 5 kb flank                                                  | 100.00 | number of G-T SNPs in 5 kb up                                                                          | 78.05 |
| frequency of AATGG in 5 kb flanking                | 100 | proportion of divergent transversions per bp in 5 kb flank                                     | 100.00 | transversions per bp 5 kb up                                                                           | 78.05 |
| frequency of AAAAA in 5 kb flanking                | 100 | proportion of AT divergent sites relative to total num divergent sites (no gaps) in 5 kb flank | 100.00 | proportion of C-G SNPs in 5 kb down relative to total num SNPs                                         | 78.05 |

|                                     |     |                                                                                                |        |                                                  |       |
|-------------------------------------|-----|------------------------------------------------------------------------------------------------|--------|--------------------------------------------------|-------|
| frequency of ACAAG in 5 kb flanking | 100 | proportion of CT divergent sites relative to total num divergent sites (no gaps) in 5 kb flank | 100.00 | A-T SNPs per bp in introns plus 5 kb flanking    | 77.70 |
| frequency of ACATC in 5 kb flanking | 100 | AT divergent sites per bp in 5 kb flank                                                        | 100.00 | frequency of ATCTC in 5 kb flanking              | 77.00 |
| frequency of ACCAC in 5 kb flanking | 100 | proportion of divergent sites that (no gaps) are transversions in 10 kb flank                  | 100.00 | frequency of CGGAT in 5 kb flanking              | 75.96 |
| frequency of ACCCC in 5 kb flanking | 100 | AT divergent sites per bp in 10 kb flank                                                       | 100.00 | frequency of TTGAA in 5 kb flanking              | 75.96 |
| frequency of ACGAC in 5 kb flanking | 100 | proportion unalignable (gaps in other species) per bp in 10 kb flank                           | 100.00 | frequency of CACTG in 5 kb flanking              | 75.26 |
| frequency of ACGCC in 5 kb flanking | 100 | proportion of C-T SNPs in exons relative to total num SNPs                                     | 99.65  | frequency of CGGTA in 5 kb flanking              | 75.26 |
| frequency of ACGGG in 5 kb flanking | 100 | proportion of transitions in introns relative to total number of SNPs                          | 99.65  | frequency of AATTC in 5 kb flanking              | 74.91 |
| frequency of ACGTG in 5 kb flanking | 100 | proportion of C-G SNPs in introns relative to total num SNPs                                   | 99.65  | frequency of TCTTT in 5 kb flanking              | 74.22 |
| frequency of ACTAA in 5 kb flanking | 100 | number of A-C SNPs in 2 kb down                                                                | 99.65  | percentage MER1_type in ccds plus 10 kb flanking | 73.52 |
| frequency of ACTAC in 5 kb flanking | 100 | A-C SNPs per bp in 2 kb down                                                                   | 99.65  | frequency of AGGTC in 5 kb flanking              | 73.52 |
| frequency of ACTAG in 5 kb flanking | 100 | proportion of G-T SNPs in introns plus 2 kb flanking relative to total num SNPs                | 99.65  | frequency of TATCA in 5 kb flanking              | 73.17 |
| frequency of AGAAT in 5 kb flanking | 100 | number of nonsynonymous snps                                                                   | 99.65  | frequency of AGCAT in 5 kb flanking              | 72.13 |
| frequency of AGACT in 5 kb flanking | 100 | percentage simple repeats in 2kb upstream                                                      | 99.65  | frequency of CAGCC in 5 kb flanking              | 71.78 |
| frequency of AGAGC in 5 kb flanking | 100 | percentage LINE1 in 2 kb downstream                                                            | 99.65  | frequency of ACTCA in 5 kb flanking              | 71.43 |
| frequency of AGATC in 5 kb flanking | 100 | number MaLRs in 2 kb downstream                                                                | 99.65  | transitions per bp in introns plus 2 kb flanking | 70.73 |
| frequency of AGCGT in 5 kb flanking | 100 | percentage L3/CR1 in 5 kb upstream                                                             | 99.65  | frequency of GAATG in 5 kb flanking              | 70.73 |
| frequency of AGTAG in 5 kb flanking | 100 | percentage low complexity in 5 kb downstream                                                   | 99.65  | frequency of TACAC in 5 kb flanking              | 70.73 |
| frequency of AGTCG in 5 kb flanking | 100 | total % bases masked in 10 kb upstream                                                         | 99.65  | percentage LINE1 in 10 kb downstream             | 69.69 |
| frequency of ATAAC in 5 kb flanking | 100 | number ERV_classI in ccds plus 2kb flanking                                                    | 99.65  | number of A-T SNPs in 10kb flanking              | 69.34 |
| frequency of ATAGG in 5 kb flanking | 100 | number L3/CR1 in ccds plus 5 kb flanking                                                       | 99.65  | frequency of TAGGC in 5 kb flanking              | 68.99 |
| frequency of ATCAT in 5 kb flanking | 100 | frequency of AGCTC in 5 kb flanking                                                            | 99.65  | A-T SNPs per bp in 10kb flanking                 | 68.64 |
| frequency of ATCGT in 5 kb flanking | 100 | frequency of AGTGT in 5 kb flanking                                                            | 99.65  | frequency of CTATA in 5 kb flanking              | 68.29 |
| frequency of ATGGT in 5 kb flanking | 100 | frequency of ATAGC in 5 kb flanking                                                            | 99.65  | CG divergent sites per bp in ccds                | 67.60 |
| frequency of ATTCC in 5 kb flanking | 100 | frequency of ATCCG in 5 kb flanking                                                            | 99.65  | AT divergent sites per bp in 10 kb up            | 67.60 |
| frequency of ATTGA in 5 kb flanking | 100 | frequency of CACTC in 5 kb flanking                                                            | 99.65  | frequency of TCATA in 5 kb flanking              | 65.51 |
| frequency of ATTGC in 5 kb flanking | 100 | frequency of CCGAG in 5 kb flanking                                                            | 99.65  | percentage LINE1 in 5 kb downstream              | 65.16 |
| frequency of CAACC in 5 kb flanking | 100 | frequency of CCGGC in 5 kb flanking                                                            | 99.65  | frequency of ATGCG in 5 kb flanking              | 64.81 |
| frequency of CAACT in 5 kb flanking | 100 | frequency of CGAAA in 5 kb flanking                                                            | 99.65  | frequency of GCGTC in 5 kb flanking              | 64.81 |
| frequency of CAAGT in 5 kb flanking | 100 | frequency of GAGAG in 5 kb flanking                                                            | 99.65  | A-G SNPs per bp in introns plus 2 kb flanking    | 64.46 |
| frequency of CAATA in 5 kb flanking | 100 | frequency of GGACG in 5 kb flanking                                                            | 99.65  | frequency of ACCCG in 5 kb flanking              | 64.46 |

|                                     |     |                                                                                                |       |                                                                                    |       |
|-------------------------------------|-----|------------------------------------------------------------------------------------------------|-------|------------------------------------------------------------------------------------|-------|
| frequency of CAATC in 5 kb flanking | 100 | frequency of TAGGT in 5 kb flanking                                                            | 99.65 | frequency of TACCC in 5 kb flanking                                                | 63.76 |
| frequency of CAATG in 5 kb flanking | 100 | proportion of CG divergent sites relative to total num divergent sites (no gaps) in 10 kb down | 99.65 | frequency of TTAGC in 5 kb flanking                                                | 62.72 |
| frequency of CAATT in 5 kb flanking | 100 | proportion of AT divergent sites relative to total num divergent sites (no gaps) in 2 kb flank | 99.65 | frequency of CGCAC in 5 kb flanking                                                | 61.67 |
| frequency of CACAG in 5 kb flanking | 100 | number of C-G SNPs in exons                                                                    | 99.30 | AT divergent sites per bp in 10 kb down                                            | 61.32 |
| frequency of CACGG in 5 kb flanking | 100 | number of C-G SNPs in 2 kb up                                                                  | 99.30 | number LINE1 in ccds plus 2kb flanking                                             | 60.28 |
| frequency of CACTT in 5 kb flanking | 100 | number of transitions in 2 kb down                                                             | 99.30 | frequency of TGTCC in 5 kb flanking                                                | 60.28 |
| frequency of CAGTG in 5 kb flanking | 100 | number of transversions in 5 kb down                                                           | 99.30 | frequency of CTGTG in 5 kb flanking                                                | 59.93 |
| frequency of CCAAG in 5 kb flanking | 100 | proportion of A-G SNPs in 10 kb up relative to total num SNPs                                  | 99.30 | proportion of C-T SNPs in 10 kb down relative to total num SNPs                    | 58.54 |
| frequency of CCAGA in 5 kb flanking | 100 | C-G SNPs per bp in introns plus 5 kb flanking                                                  | 99.30 | percentage unclassified in ccds                                                    | 58.19 |
| frequency of CCATC in 5 kb flanking | 100 | number low complexity in 5 kb upstream                                                         | 99.30 | frequency of CTATT in 5 kb flanking                                                | 58.19 |
| frequency of CCCGC in 5 kb flanking | 100 | frequency of GGCTT in 5 kb flanking                                                            | 99.30 | percentage LINEs in 2 kb downstream                                                | 57.49 |
| frequency of CCGCT in 5 kb flanking | 100 | frequency of GTTAC in 5 kb flanking                                                            | 99.30 | frequency of ATTAT in 5 kb flanking                                                | 57.14 |
| frequency of CCTGG in 5 kb flanking | 100 | proportion of GT divergent sites relative to total num divergent sites (no gaps) in ccds       | 99.30 | frequency of CATT A in 5 kb flanking                                               | 57.14 |
| frequency of CGAAG in 5 kb flanking | 100 | number of total SNPs in exons                                                                  | 98.95 | frequency of ATCCT in 5 kb flanking                                                | 56.10 |
| frequency of CGAGG in 5 kb flanking | 100 | A-G SNPs per bp in introns plus 5 kb flanking                                                  | 98.95 | frequency of TTTGC in 5 kb flanking                                                | 56.10 |
| frequency of CGCCT in 5 kb flanking | 100 | transitions per bp in introns plus 5 kb flanking                                               | 98.95 | number LINEs in ccds plus 5 kb flanking                                            | 54.70 |
| frequency of CGGCG in 5 kb flanking | 100 | transversions per bp in introns plus 5 kb flanking                                             | 98.95 | proportion of divergent sites per bp in 5 kb up                                    | 52.96 |
| frequency of CGGTG in 5 kb flanking | 100 | total % bases masked in 2kb upstream                                                           | 98.95 | proportion unalignable (gaps in other species) per bp in 2 kb down                 | 52.61 |
| frequency of CGGTT in 5 kb flanking | 100 | percentage MaLRs in 2 kb downstream                                                            | 98.95 | percentage SINEs in 10 kb upstream                                                 | 51.57 |
| frequency of CGTGT in 5 kb flanking | 100 | percentage LTR in 5 kb downstream                                                              | 98.95 | frequency of ATGTG in 5 kb flanking                                                | 51.57 |
| frequency of CGTTC in 5 kb flanking | 100 | frequency of CGCTG in 5 kb flanking                                                            | 98.95 | AG divergent sites per bp in introns                                               | 51.57 |
| frequency of CTACA in 5 kb flanking | 100 | frequency of CGGGC in 5 kb flanking                                                            | 98.95 | percentage ERV_classII in 2kb upstream                                             | 50.87 |
| frequency of CTACC in 5 kb flanking | 100 | frequency of GGCTC in 5 kb flanking                                                            | 98.95 | frequency of CGTCC in 5 kb flanking                                                | 50.87 |
| frequency of CTACG in 5 kb flanking | 100 | frequency of GTCTG in 5 kb flanking                                                            | 98.95 | frequency of CTCTG in 5 kb flanking                                                | 50.87 |
| frequency of CTAGA in 5 kb flanking | 100 | frequency of TCTCT in 5 kb flanking                                                            | 98.95 | frequency of TGGTA in 5 kb flanking                                                | 50.52 |
| frequency of CTCGT in 5 kb flanking | 100 | number of G-T SNPs in exons                                                                    | 98.61 | proportion of divergent sites that (no gaps) are transversions in ccds + 2kb flank | 50.52 |
| frequency of CTGCG in 5 kb flanking | 100 | number of A-G SNPs in 10kb flanking                                                            | 98.61 | frequency of CGAGC in 5 kb flanking                                                | 50.17 |
| frequency of CTGTT in 5 kb flanking | 100 | proportion of A-G SNPs in introns plus 2 kb flanking relative to total num SNPs                | 98.61 | frequency of GGGTG in 5 kb flanking                                                | 50.17 |
| frequency of CTTAA in 5 kb flanking | 100 | A-C SNPs per bp in introns plus 2 kb flanking                                                  | 98.61 | frequency of TTGAC in 5 kb flanking                                                | 49.48 |

|                                     |     |                                                                                           |       |                                                                                          |       |
|-------------------------------------|-----|-------------------------------------------------------------------------------------------|-------|------------------------------------------------------------------------------------------|-------|
| frequency of CTTAC in 5 kb flanking | 100 | G-T SNPs per bp in introns plus 5 kb flanking                                             | 98.61 | GC content in ccds                                                                       | 48.08 |
| frequency of CTTGA in 5 kb flanking | 100 | percentage unclassified in 2kb upstream                                                   | 98.61 | frequency of CTAGC in 5 kb flanking                                                      | 48.08 |
| frequency of CTTGC in 5 kb flanking | 100 | percentage LTR in 2 kb downstream                                                         | 98.61 | frequency of CAGGG in 5 kb flanking                                                      | 47.39 |
| frequency of CTTGT in 5 kb flanking | 100 | frequency of CAACG in 5 kb flanking                                                       | 98.61 | proportion of A-T SNPs in 5 kb up relative to total num SNPs                             | 45.99 |
| frequency of CTTTG in 5 kb flanking | 100 | frequency of CAGAT in 5 kb flanking                                                       | 98.61 | frequency of GGTC in 5 kb flanking                                                       | 45.99 |
| frequency of GAAGG in 5 kb flanking | 100 | proportion of C-G SNPs in 2 kb up relative to total num SNPs                              | 98.26 | frequency of GTACC in 5 kb flanking                                                      | 45.99 |
| frequency of GACCC in 5 kb flanking | 100 | A-G SNPs per bp in 10kb flanking                                                          | 98.26 | proportion unalignable (gaps in human or other species) per bp in ccds + 2kb flank       | 45.64 |
| frequency of GACGG in 5 kb flanking | 100 | C-G SNPs per bp in introns plus 2 kb flanking                                             | 98.26 | proportion of C-G SNPs in 2 kb down relative to total num SNPs                           | 45.30 |
| frequency of GACGT in 5 kb flanking | 100 | G-T SNPs per bp in introns plus 2 kb flanking                                             | 98.26 | proportion of transitions in ccds plus 5kb flanking relative to total num of SNPs        | 44.60 |
| frequency of GAGAC in 5 kb flanking | 100 | transversions per bp introns plus 2 kb flanking                                           | 98.26 | proportion of AC divergent sites relative to total num divergent sites (no gaps) in ccds | 44.25 |
| frequency of GAGCT in 5 kb flanking | 100 | percentage ALUs in 5 kb downstream                                                        | 98.26 | total % bases masked in 2 kb downstream                                                  | 43.21 |
| frequency of GAGTA in 5 kb flanking | 100 | frequency of GTCCC in 5 kb flanking                                                       | 98.26 | frequency of GAACA in 5 kb flanking                                                      | 42.86 |
| frequency of GAGTT in 5 kb flanking | 100 | frequency of TACAG in 5 kb flanking                                                       | 98.26 | frequency of GGCGC in 5 kb flanking                                                      | 42.86 |
| frequency of GATAC in 5 kb flanking | 100 | percentage unclassified in ccds plus 10 kb flanking                                       | 97.91 | total snps per bp in 2 kb up                                                             | 42.16 |
| frequency of GATCA in 5 kb flanking | 100 | frequency of ACCGG in 5 kb flanking                                                       | 97.91 | proportion of G-T SNPs in 2 kb down relative to total num SNPs                           | 41.81 |
| frequency of GATCC in 5 kb flanking | 100 | frequency of ACTCT in 5 kb flanking                                                       | 97.91 | frequency of CGTTT in 5 kb flanking                                                      | 41.46 |
| frequency of GATTC in 5 kb flanking | 100 | frequency of CGTCA in 5 kb flanking                                                       | 97.91 | frequency of CTCTT in 5 kb flanking                                                      | 41.11 |
| frequency of GCAAA in 5 kb flanking | 100 | frequency of GCCCC in 5 kb flanking                                                       | 97.91 | proportion of G-T SNPs in ccds plus 5kb flanking relative to total num SNPs              | 40.42 |
| frequency of GCAAC in 5 kb flanking | 100 | frequency of TTCTC in 5 kb flanking                                                       | 97.91 | frequency of TCGAG in 5 kb flanking                                                      | 40.42 |
| frequency of GCAGG in 5 kb flanking | 100 | proportion of AG divergent sites relative to total num divergent sites (no gaps) in exons | 97.91 | percentage ERV_classII in 2 kb downstream                                                | 39.72 |
| frequency of GCCTT in 5 kb flanking | 100 | proportion of total divergent sites that are gaps, including gaps in 2 kb down            | 97.91 | frequency of CCGAC in 5 kb flanking                                                      | 39.37 |
| frequency of GCGAC in 5 kb flanking | 100 | proportion of transitions in 2 kb down relative to total num of SNPs                      | 97.56 | frequency of ATGAT in 5 kb flanking                                                      | 38.33 |
| frequency of GCGCC in 5 kb flanking | 100 | number simple repeats in 2 kb downstream                                                  | 97.56 | frequency of CTCGA in 5 kb flanking                                                      | 37.63 |
| frequency of GCGGG in 5 kb flanking | 100 | percentage LINE2 in 5 kb downstream                                                       | 97.56 | frequency of ACTGA in 5 kb flanking                                                      | 35.19 |
| frequency of GCGTA in 5 kb flanking | 100 | number LINE1 in 10 kb downstream                                                          | 97.56 |                                                                                          |       |
| frequency of GCTCC in 5 kb flanking | 100 | frequency of ACATT in 5 kb flanking                                                       | 97.56 |                                                                                          |       |
| frequency of GCTGC in 5 kb flanking | 100 | frequency of AGTGA in 5 kb flanking                                                       | 97.56 |                                                                                          |       |
| frequency of GCTTG in 5 kb flanking | 100 | frequency of GGATT in 5 kb flanking                                                       | 97.56 |                                                                                          |       |

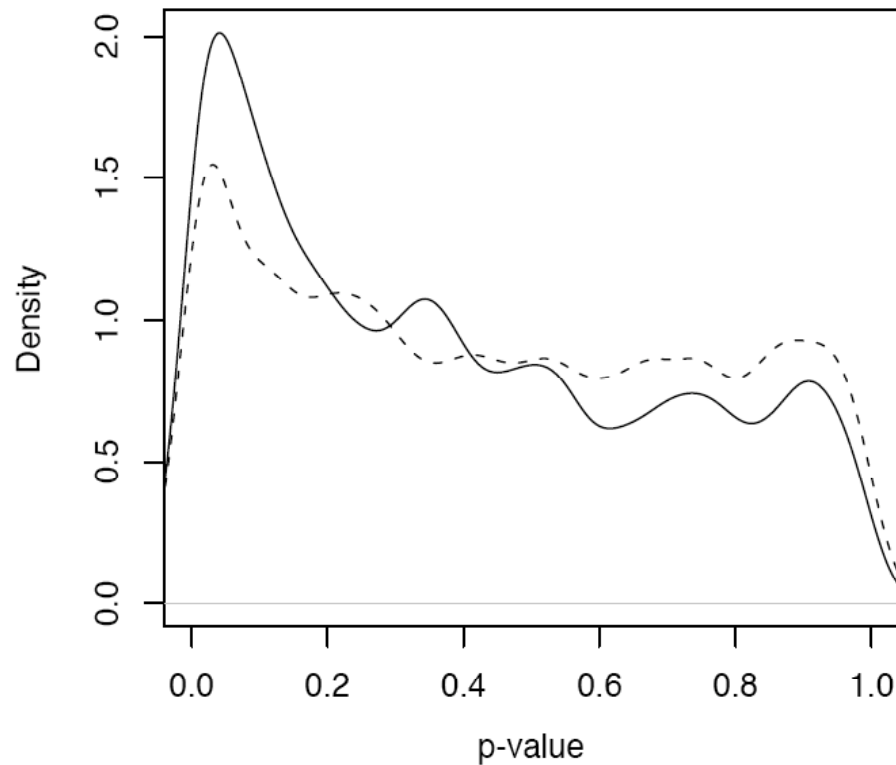

**Figure S1.** Five-mers from gene flanking regions differentiate between the allelic imbalance class and the non-allelic imbalance class better than five-mers from the coding sequence. Lines show the smoothed histograms of p-values from Wilcoxon summed ranks tests for all 1024 possible five-mers, where each test compares the values of a five-mer feature for the AI class and the non-AI class. The solid line represents five-mers from concatenated region 5 kb upstream of the start of translation and 5 kb downstream of the translation stop site; the dashed line represents five-mers obtained from the coding sequence (exons + introns). Because the p-values for the 5 kb flanking region were more skewed towards low (i.e., nominally significant) values, we used only these features when subsequently fitting the full model.

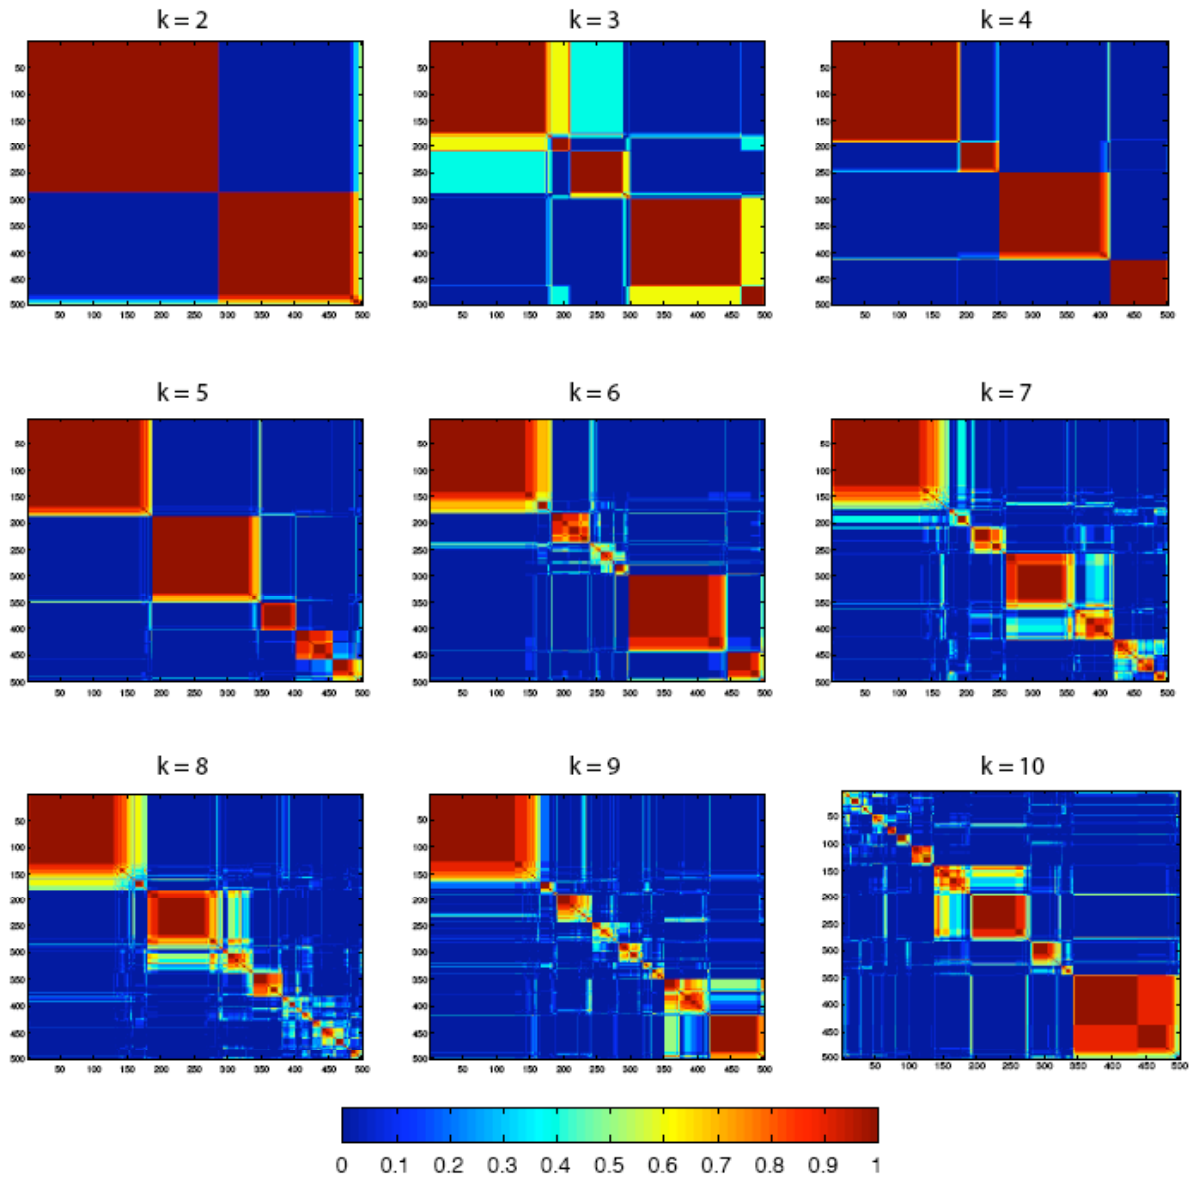

**Figure S2.** NMF consensus clustering matrices for varying number of clusters  $k$ . The matrix displays the frequency that the 500 features are found to be in the same cluster when the NMF algorithm is applied with different random initialization values.

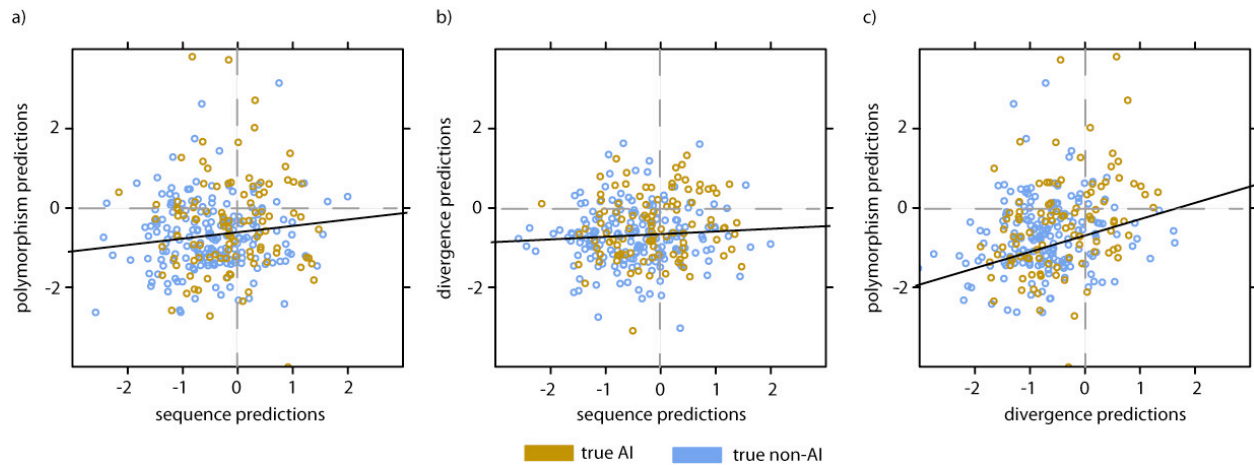

**Figure S3.** Correlation between predictions based on single feature subsets. Positive values on the x and y axes correspond to a prediction that the gene falls in the AI class; negative values correspond to a prediction that the gene falls in the non-AI class. Neither polymorphism- nor divergence-based predictions are correlated with sequence-based predictions: (a) Sequence predictions versus polymorphism predictions (Spearman's  $\rho = 0.051$ ,  $p = 0.389$ ); (b) Sequence predictions versus divergence predictions (Spearman's  $\rho = 0.085$ ,  $p = 0.150$ ). However, predictions derived from polymorphism features and divergence features are significantly positively correlated, suggesting that polymorphism data and divergence data contain partially redundant information about allelic imbalance: (c) Divergence predictions versus polymorphism predictions (Spearman's  $\rho = 0.250$ ,  $p = 1.93 \times 10^{-5}$ ).

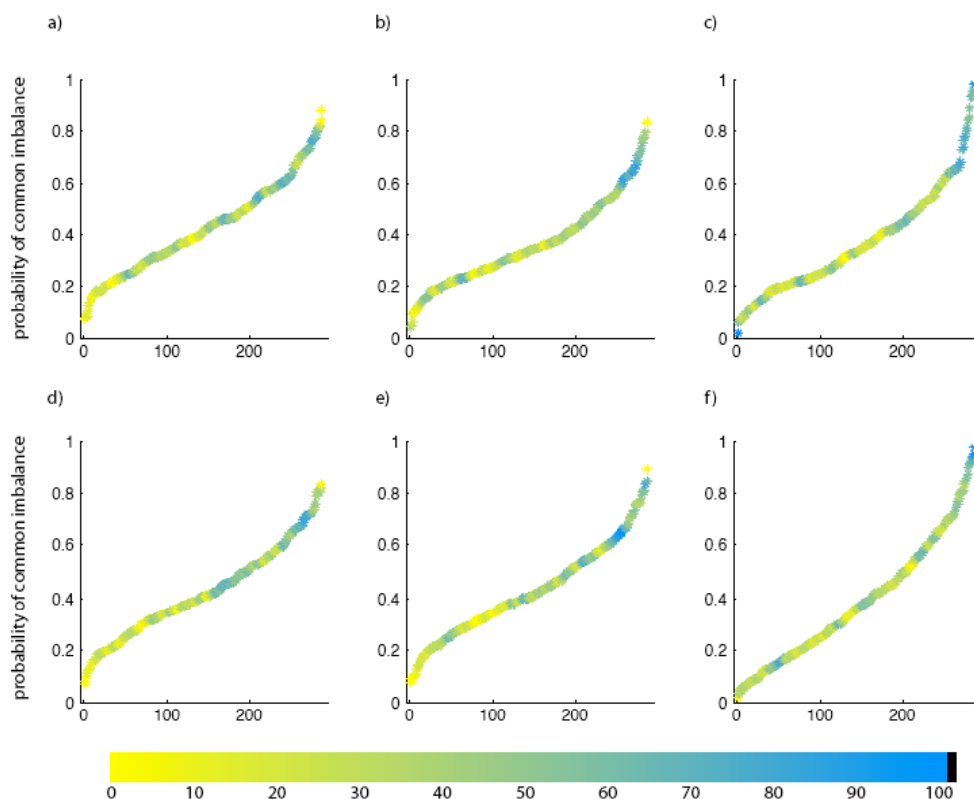

**Figure S4.** Genes with more extreme predicted values are more likely to be predicted correctly. Predictions from different models were passed through a logit link function to produce a predicted probability of common imbalance at each gene. All 287 probability values are plotted, ranked from lowest probability of common imbalance to highest probability of common imbalance. True imbalance class is reflected by the color bar: yellow represents non-AI genes and blue represents AI genes. The color for each dot represents the degree to which model predictions were correct for a window size of eight genes around a given gene. Non-AI genes are predicted as commonly imbalanced with lower probability (lower left of each panel); AI genes are predicted as commonly imbalanced with higher probability (upper right of each panel). (a) Sequence features only; (b) Divergence features only; (c) Polymorphism features only; (d) Sequence + Divergence features; (e) Sequence + Polymorphism; (f) Polymorphism + Divergence.



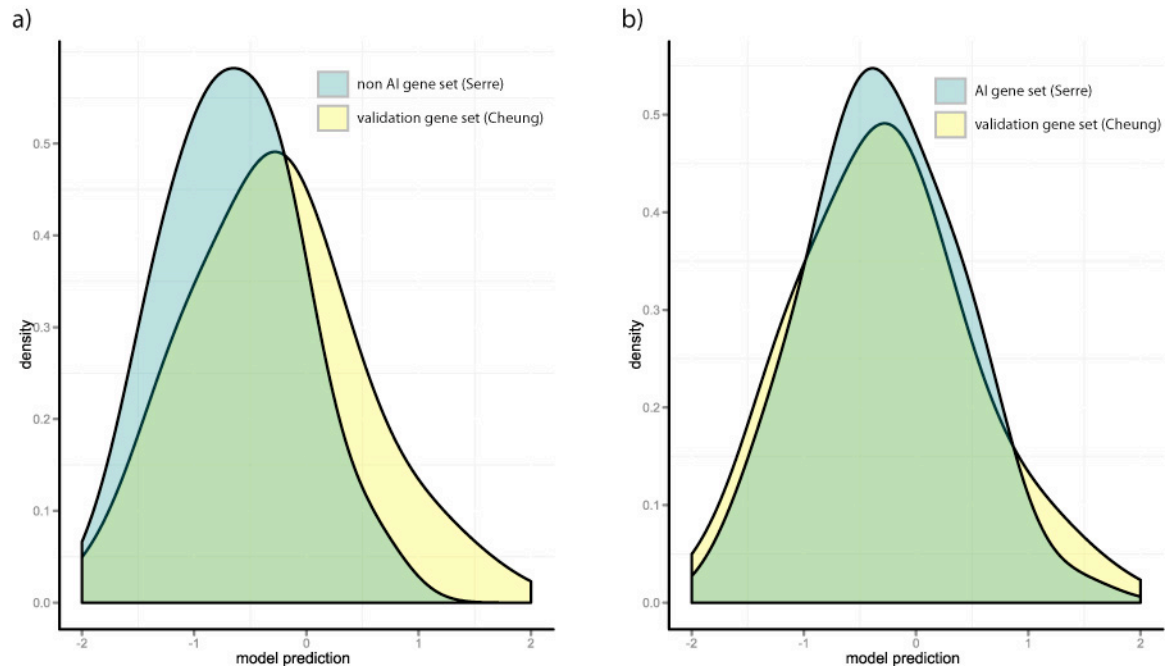

**Figure S5.** Raw predictions from the full model for genes that exhibit allelic imbalance in the Cheung et al. (2008) dataset are significantly different from predictions for the non-AI gene set ( $p = 4.70 \times 10^{-6}$ ) derived from Serre et al. (2008), but not significantly different from predictions for the AI gene set from Serre et al. ( $p = 0.506$ ).

## Supplementary Methods:

### *Radial basis function kernel for the SVM*

We explored whether use of an alternative kernel function would improve the classification accuracy of the full model using the radial basis function kernel implemented in the program SVM<sup>light</sup> (the ‘-t 2’ option: Joachims 1999). The gamma parameter for the RBF kernel was estimated as the inverse of the median value of the sum of squared pairwise differences among all 287 genes in the sample. We explored settings of gamma over four orders of magnitude, centered on this estimate, and also over four orders of magnitude of the regularization parameter  $C$ . In no case did classification accuracy (as assessed by leave-one-out cross validation) improve over use of the default linear kernel. Hence, for all subsequent models and all results reported in the main text, we used a linear kernel.

### *Relationship between magnitude of imbalance and classification accuracy*

We analyzed the correlation between the mean allelic imbalance from the Serre *et al* (2008) dataset for genes in the allelic imbalance class and the predictions from the full model (for both  $C = 0.05$  and  $C = 1$ ). Where multiple values were given for the same gene (corresponding to different allelic imbalance marker SNPs within the gene), we always used the most extreme mean imbalance. All mean imbalance values were  $\log_2$  transformed prior to analysis.

We found some evidence for a relationship between the mean magnitude of imbalance and classification accuracy for predictions made with  $C = 0.05$  (Spearman’s  $\rho = 0.229$ ,  $p = 0.026$ ). Specifically, we identified a positive correlation between mean imbalance and the value of the prediction made by the full model when we used the continuous value of  $f(x)$  from the model (more positive values of  $f(x)$  correspond to greater confidence that a gene is truly commonly imbalanced; more negative values of  $f(x)$  correspond to greater confidence that a gene is truly not imbalanced). This result suggests that genes that exhibit more extreme mean imbalance may be easier to predict using our approach than genes that exhibit more modest levels of imbalance. However, it is difficult to disentangle whether means in this case truly represent more extreme values when imbalance occurs or, instead, imbalance that occurs more commonly in the population. When we conducted the same analysis with predictions made with  $C = 1$ , we found no relationship between mean imbalance and the value of the predictions (Spearman’s  $\rho = -0.056$ ,  $p = 0.586$ ). Hence, it remains unclear whether heterogeneity in the predictive ability of our model can generally be accounted for by differences in magnitude of mean imbalance.
